# Supplementary material for: Successfully implementing and embedding guidelines to improve the nutrition and growth of preterm infants in neonatal intensive care: a prospective interventional study
Source: PubMed Central journal article supplement (PMC5728292; doi:10.1136/bmjopen-2017-017727), 2017-12-06
Supplement: bmjopen-2017-017727.draft_revisions.pdf [file bmjopen-2017-017727.draft_revisions.pdf]

# BMJ Open

BMJ Open is committed to open peer review. As part of this commitment we make the peer review history of every article we publish publicly available.

When an article is published we post the peer reviewers' comments and the authors' responses online. We also post the versions of the paper that were used during peer review. These are the versions that the peer review comments apply to.

The versions of the paper that follow are the versions that were submitted during the peer review process. They are not the versions of record or the final published versions. They should not be cited or distributed as the published version of this manuscript.

BMJ Open is an open access journal and the full, final, typeset and author-corrected version of record of the manuscript is available on our site with no access controls, subscription charges or pay-per-view fees (<http://bmjopen.bmj.com>).

If you have any questions on BMJ Open's open peer review process please email [editorial.bmjopen@bmj.com](mailto:editorial.bmjopen@bmj.com)

# BMJ Open

## Successful implementation and embedding of guidelines to improve the nutrition and growth of preterm infants in neonatal intensive care

|                                 |                                                                                                                                                                                                                                                                                                                                                                                                                                                                                                                                                                                                                                                                                                                                                                                                                                                                                                                                                                                                                            |
|---------------------------------|----------------------------------------------------------------------------------------------------------------------------------------------------------------------------------------------------------------------------------------------------------------------------------------------------------------------------------------------------------------------------------------------------------------------------------------------------------------------------------------------------------------------------------------------------------------------------------------------------------------------------------------------------------------------------------------------------------------------------------------------------------------------------------------------------------------------------------------------------------------------------------------------------------------------------------------------------------------------------------------------------------------------------|
| Journal:                        | <i>BMJ Open</i>                                                                                                                                                                                                                                                                                                                                                                                                                                                                                                                                                                                                                                                                                                                                                                                                                                                                                                                                                                                                            |
| Manuscript ID                   | bmjopen-2017-017727                                                                                                                                                                                                                                                                                                                                                                                                                                                                                                                                                                                                                                                                                                                                                                                                                                                                                                                                                                                                        |
| Article Type:                   | Research                                                                                                                                                                                                                                                                                                                                                                                                                                                                                                                                                                                                                                                                                                                                                                                                                                                                                                                                                                                                                   |
| Date Submitted by the Author:   | 12-May-2017                                                                                                                                                                                                                                                                                                                                                                                                                                                                                                                                                                                                                                                                                                                                                                                                                                                                                                                                                                                                                |
| Complete List of Authors:       | Johnson, Mark; University Hospital Southampton NHS Foundation Trust and University of Southampton, National Institute for Health Research Southampton Biomedical Research Centre; University Hospital Southampton NHS Foundation Trust, Department of Neonatal Medicine Leaf, Alison; University Hospital Southampton NHS Foundation Trust and University of Southampton, National Institute for Health Research Southampton Biomedical Research Centre; University Hospital Southampton NHS Foundation Trust, Department of Neonatal Medicine Pearson, Freya; University Hospital Southampton NHS Foundation Trust, Department of Neonatal Medicine Clark, Howard; University Hospital Southampton NHS Foundation Trust, Department of Neonatal Medicine; University of Southampton, Faculty of Medicine Dimitrov, Borislav; University of Southampton, Primary Care and Population Sciences Pope, Catherine; University of Southampton, Health Sciences May, Carl; University of Southampton, Faculty of Health Sciences |
| <b>Primary Subject Heading</b>: | Health services research                                                                                                                                                                                                                                                                                                                                                                                                                                                                                                                                                                                                                                                                                                                                                                                                                                                                                                                                                                                                   |
| Secondary Subject Heading:      | Nutrition and metabolism, Paediatrics                                                                                                                                                                                                                                                                                                                                                                                                                                                                                                                                                                                                                                                                                                                                                                                                                                                                                                                                                                                      |
| Keywords:                       | Change management < HEALTH SERVICES ADMINISTRATION & MANAGEMENT, Protocols & guidelines < HEALTH SERVICES ADMINISTRATION & MANAGEMENT, Neonatal intensive & critical care < INTENSIVE & CRITICAL CARE, NEONATOLOGY, NUTRITION & DIETETICS                                                                                                                                                                                                                                                                                                                                                                                                                                                                                                                                                                                                                                                                                                                                                                                  |
|                                 |                                                                                                                                                                                                                                                                                                                                                                                                                                                                                                                                                                                                                                                                                                                                                                                                                                                                                                                                                                                                                            |

SCHOLARONE™  
Manuscripts

1  
2  
3  
4 1 **Successful implementation and embedding of guidelines to improve the**  
5 2 **nutrition and growth of preterm infants in neonatal intensive care**

7 3 *Mark J Johnson*<sup>1,2</sup>([m.johnson@soton.ac.uk](mailto:m.johnson@soton.ac.uk)), *Alison A Leaf*<sup>1,2</sup>([a.a.leaf@soton.ac.uk](mailto:a.a.leaf@soton.ac.uk)), *Freya*  
8 4 *Pearson*<sup>2</sup>([freya.pearson@uhs.nhs.uk](mailto:freya.pearson@uhs.nhs.uk)), *Howard W. Clark*<sup>2,3</sup>([h.w.clark@soton.ac.uk](mailto:h.w.clark@soton.ac.uk)) *Borislav D.*  
9 5 *Dimitrov*<sup>4</sup>([b.dimitrov@soton.ac.uk](mailto:b.dimitrov@soton.ac.uk)), *Catherine Pope*<sup>5</sup> ([c.j.pope@soton.ac.uk](mailto:c.j.pope@soton.ac.uk)) & *Carl R. May*<sup>5</sup>  
10 6 ([c.r.may@soton.ac.uk](mailto:c.r.may@soton.ac.uk))

13  
14 7 <sup>1</sup>National Institute for Health Research, Southampton Biomedical Research Centre, University Hospital  
15 8 Southampton NHS Foundation Trust and University of Southampton, Southampton, UK

17  
18 9 <sup>2</sup>Department of Neonatal Medicine, Princess Anne Hospital, University Hospital Southampton NHS  
19 10 Foundation Trust, Southampton, UK

21  
22 11 <sup>3</sup>University Child Health, Faculty of Medicine, University of Southampton, Southampton, Hampshire, UK

23  
24 12 <sup>4</sup>Primary Care and Population Sciences, Faculty of Medicine, University of Southampton, Southampton,  
25 13 Hampshire, UK

26  
27  
28 14 <sup>5</sup>Faculty of Health Sciences, University of Southampton, Southampton, Hampshire, UK

29  
30  
31 15 **Corresponding Author**

32  
33 16 Mark J. Johnson  
34 17 Department of Neonatal Medicine  
35 18 Mailpoint 105 Level E  
36 19 University Hospital Southampton NHS Foundation Trust  
37 20 Princess Anne Hospital  
38 21 Coxford Road  
39 22 Southampton  
40 23 Hants  
41 24 SO16 5YA  
42 25 Tel: +442381204643  
43 26 Email: [m.johnson@soton.ac.uk](mailto:m.johnson@soton.ac.uk)  
44  
45  
46  
47  
48

49 28 **Keywords:** Implementation, Premature Infant, Nutrition, Nutritional Assessment, Growth  
50  
51  
52

53 30 **Word Count:** 4256  
54  
55  
56  
57  
58  
59  
60

**32 ABSTRACT****33 Objectives**

34 We aimed to improve the nutritional care of preterm infants by developing a complex (multifaceted)  
35 intervention intended to translate current evidence into practice. We used the sociological framework  
36 of Normalization Process Theory (NPT), to guide implementation in order to embed the new practices  
37 into routine care,

**38 Design**

39 A prospective interventional study with a before and after methodology

**40 Participants**

41 Infants <30 weeks gestation or <1500g at birth.

**42 Setting**

43 Tertiary neonatal intensive care unit

**44 Interventions**

45 The intervention was introduced in phases: Phase 1 (Control period, Jan-Aug 2011); Phase 2 (Partial  
46 Implementation; improved parenteral and enteral nutrition solutions, nutrition team, education, Aug-  
47 Dec 2011); Phase 3 (Full implementation; guidelines, screening tool, 'nurse champions', Jan-Dec 2012);  
48 Phase 4 (Post implementation; Jan-Jun 2013). Bi-monthly audits and staff NPT questionnaires were used  
49 to measure guideline compliance and 'normalisation' respectively. NPT scores were used to guide  
50 implementation in real time. Data on nutrient intakes and growth were collected continuously.

**51 Results**

52 There were 52, 36, 75 and 35 infants in phases 1, 2, 3 and 4 respectively. Mean guideline compliance  
53 exceeded 75% throughout the intervention period, peaking at 85%. Guideline compliance and NPT  
54 scores both increased over time, ( $r=0.92$  and  $0.15$ ,  $p<0.03$  for both), with a significant linear association  
55 between the two ( $r=0.21$ ,  $p<0.01$ ). There were significant improvements in daily protein intake and  
56 weight gain between birth and discharge in phases 2 and 3 compared to phase 1 ( $p<0.01$  for all), which  
57 were sustained into phase 4.

**58 Conclusions**

59 NPT and audit results suggest that the intervention was rapidly incorporated into practice, with high  
60 guideline compliance and accompanying improvements in protein intake and weight gain. NPT appears  
61 to offer an effective way of implementing new practices such that they lead to sustained changes in  
62 care. Complex interventions based on current evidence can improve both practice and clinical  
63 outcomes.

64

1  
2  
3  
4  
5  
6  
7  
8  
9  
10  
11  
12  
13  
14  
15  
16  
17  
18  
19  
20  
21  
22  
23  
24  
25  
26  
27  
28  
29  
30  
31  
32  
33  
34  
35  
36  
37  
38  
39  
40  
41  
42  
43  
44  
45  
46  
47  
48  
49  
50  
51  
52  
53  
54  
55  
56  
57  
58  
59  
60

65 **ARTICLE SUMMARY**

66 **Strengths and Limitations of the this study**

- 67 • This study was novel in using a sociological theory (Normalisation Process Theory) to both guide
- 68 and measure the process of implementation
- 69 • This study shows that complex interventions, when properly implemented, can change practice
- 70 in a sustained fashion
- 71 • The before and after methodology used in this study is a limitation and means result should be
- 72 interested with caution, but allowed the implementation process to be studied more closely and
- 73 in ‘real world’ conditions.

74  
75  
76  
77  
78

For peer review only

1  
2  
3 79 **MAIN MANUSCRIPT TEXT**  
4  
5

6 80 **BACKGROUND**  
7  
8

9  
10 81 Attempts to span translational gaps and implement evidence-based practice into routine clinical practice  
11  
12 82 often fail [1, 2]. This can mean that patients fail to receive optimal treatment, or conversely may mean  
13  
14 83 they receive unnecessary or potentially harmful care. Neonatal intensive care offers important  
15  
16 84 opportunities for professional behaviour change and practice implementation but is a complex and  
17  
18 85 demanding environment. The Neonatal Intensive Care Unit (NICU) has very vulnerable patients with  
19  
20  
21 86 complex and multiple medical problems, and a large multidisciplinary healthcare team working variable  
22  
23 87 shift patterns. It is also a highly technological and information rich environment. Staff must manage and  
24  
25 88 assimilate a constantly changing array of clinical information from a variety of sources, including  
26  
27  
28 89 monitoring equipment and computerised results systems. It is an interaction rich environment too: with  
29  
30 90 complex interactions between different professionals, parents and patients themselves. It is a  
31  
32 91 demanding environment to work in, with priorities constantly changing across the unit as new patients  
33  
34  
35 92 are admitted or others become clinically unstable.  
36  
37

38 93 The nutritional care and growth of preterm infants managed in the NICU is an important example of the  
39  
40 94 problem of translating evidence into practice. Recommendations for nutrient intakes have been  
41  
42 95 published [3, 4], however there is evidence that these are not effectively integrated into clinical practice  
43  
44 96 [5]. There is also evidence that inconsistent and variable nutritional care may be partly responsible for  
45  
46 97 sub-optimal growth. Neonatal units offering the same level of care have reported significant variations  
47  
48 98 in rates of postnatal growth restriction and in length of stay, with differences in feeding practices shown  
49  
50 99 to be one of the factors responsible for this variation [6]. Taking this together with the complexity of the  
51  
52 100 NICU environment, it is understandable that current evidence and recommendations for practice fail to  
53  
54  
55 101 be consistently assimilated. We have recently discussed the issues surrounding context and complexity,  
56  
57  
58  
59  
60

1  
2  
3 102 and it is clear that context has a profound effect on the extent to which new practices can be  
4  
5 103 successfully implemented [7].  
6  
7

8  
9 104 In this paper we describe the successful implementation of a nutrition guideline for preterm infants in a  
10  
11 105 UK NICU leading to sustained change in practice. We show how integrating this guideline into patient  
12  
13 106 care effectively required a carefully designed programme of translational work that facilitated both  
14  
15 107 professional behaviour change (when professionals work differently) and practice implementation  
16  
17 108 (when they embed new ways of conceptualizing, enacting and organizing practice into their workflow).  
18  
19 109 We explain the operation of this programme of translational work using Normalization Process Theory  
20  
21 110 (NPT) [8, 9], a conceptual tool-kit that helped us both to plan guideline implementation and to  
22  
23 111 understand its dynamics [10]. More than 250 studies have now been reported that employ NPT. It offers  
24  
25 112 a rigorous and transferable explanatory model of the mechanisms that promote implementation  
26  
27 113 processes and fits well with the MRC Framework for Evaluating Complex Interventions [11, 12]. NPT has  
28  
29 114 four main constructs; Coherence (whether people understand the need for change), Cognitive  
30  
31 115 Participation (whether people understand the change itself and what they need to do to enact new  
32  
33 116 practices), Collective action (whether people actually do the work needed for the new practices) and  
34  
35 117 Reflexive monitoring (whether people see the benefit of the new practices in their daily work). In **Figure**  
36  
37 118 **1**, we show how the mechanisms that drive implementation processes are characterised in NPT. Whilst  
38  
39 119 NPT provides a robust model of implementation that has often been used retrospectively to explain  
40  
41 120 these process, it has less frequently been used to develop, guide and drive implementation  
42  
43 121 prospectively as it was in the present study.  
44  
45  
46  
47  
48  
49

50  
51 122  
52  
53 123 **METHODS**  
54  
55  
56  
57  
58  
59  
60

1  
2  
3 124 **Aims.** We hypothesized that (i) the implementation of an evidence-based nutrition guideline for preterm  
4  
5 125 infants would improve nutrient intakes and growth; and (ii) that the use of NPT to monitor and guide  
6  
7 126 implementation of the guideline would result in its successful integration into practice. We anticipated  
8  
9  
10 127 that improvements in nutrient intake and growth that would follow from successful implementation  
11  
12 128 would have important health benefits.

13  
14  
15 129 **Setting and sample.** The study was conducted in a NICU in the South of England. Inborn infants with a  
16  
17 130 gestational age less than 30 weeks or birth weight less than 1501g were eligible for inclusion in the  
18  
19 131 study, and were automatically included from birth to receive the newly implemented service for the  
20  
21 132 provision and monitoring of nutrition for preterm infants. Staff were eligible for inclusion in the study if  
22  
23 133 they were qualified clinicians (nurses, doctors, dietitians) rostered to NICU during the phase 2, 3 and 4 of  
24  
25 134 the implementation study. They took part in individual structured (questionnaire) data collection using  
26  
27 135 an online tool, and semi-structured (qualitative) interviews and focus groups facilitated by MJJ. The  
28  
29 136 study was approved by an NHS Research Ethics Committee, ('Oxford 'B' Reference 11/sc/0365). **Figure 2**  
30  
31 137 shows a flow chart of the study.

32  
33  
34  
35  
36  
37 138 **Intervention development.** A complex intervention was developed with the aim of translating evidence  
38  
39 139 about the nutritional care of preterm infants into practice. It was based on current literature and  
40  
41 140 practice recommendations available at the time (see additional file 1). To improve the likelihood of  
42  
43 141 implementation and embedding in practice, each component of the intervention also aimed to target  
44  
45 142 implementation mechanisms identified by NPT[13]. The implementation intervention had seven major  
46  
47 143 components:

- 48  
49  
50  
51  
52 144
  - A comprehensive nutrition guideline (see additional file 1).
- 53  
54 145
  - A screening tool to identify nutritional risk, linked to specific guideline pathways and nutrition
- 55  
56 146 review [14].
- 57  
58  
59  
60



- 1  
2  
3 147   ▪ Improved nutritional products: Stock PN solutions were revised to provide more nutrition in a  
4  
5 148   smaller volume and new formula milks and breast milk fortifier introduced with higher nutritional  
6  
7  
8 149   content.
- 9  
10 150   ▪ A multidisciplinary nutrition support team, (consultant neonatologist with an interest in nutrition, a  
11  
12 151   neonatal dietitian, a neonatal pharmacist and nurse champions).
- 13  
14 152   ▪ Nurse champions seconded one day in five to the nutrition team to improve their knowledge and  
15  
16 153   skills nutritional care, and four days in five working clinically, supporting their colleagues in the new  
17  
18 154   ways of working[15].
- 19  
20 155   ▪ A weekly nutrition ward round to review infants at the highest nutritional risk and provide additional  
21  
22 156   management plans for nutrition

23  
24  
25  
26  
27 157   Once developed, the clinical guidelines were circulated to staff and two focus groups held in order to  
28  
29 158   both raise awareness of the changes in practice and to gain insight into potential barriers or facilitators  
30  
31 159   to the implementation process, enabling tailoring of the guidelines to the local setting.

32  
33  
34  
35 160   **Guideline implementation.** This was an observational study. Data were collected in discrete periods  
36  
37 161   between January 2011 and June 2013:

- 38  
39  
40 162   a. **Control period** (1st January 2011 and 31st July 2011). Nutrient intake and growth data on infants  
41  
42 163   born during this period were collected retrospectively after the study had finished in order to  
43  
44 164   provide a contemporaneous 'control' group.
- 45  
46  
47 165   b. **Intervention planning and introduction of improved nutrition products** (August 1st – December  
48  
49 166   31st 2011). Nutrient intake and growth data on infants were collected prospectively during this  
50  
51 167   period, during which some elements of the intervention (including improved nutritional solutions)  
52  
53 168   were introduced, and staff were consulted about guideline intervention and its associated changes  
54  
55  
56  
57  
58  
59  
60

1  
2  
3 169 in organization and practice. In addition, the work with staff carried out during this period to  
4  
5 170 develop the intervention would also be likely to begin to affect practice.  
6  
7

8 171 c. **Facilitated guideline implementation** (January 1st- December 31st 2012) during which the full  
9  
10 172 complex intervention was implemented. Nutrient intake and growth data on infants were collected  
11  
12 173 prospectively and audits of guideline compliance and staff NPT Toolkit questionnaires were carried  
13  
14 174 out bi-monthly.  
15  
16

17 175 d. **Post-implementation phase** (January 1st- June 30th 2013). Nutrient intake and growth data on  
18  
19 176 infants were collected prospectively during this period, and one final audit of guideline compliance  
20  
21 177 was carried out to assess the degree to which the new practices remained in place after the main  
22  
23 178 intervention period.  
24  
25  
26

27 179 **Patient outcomes.** Infant outcomes of primary interest were (i) differences in mean daily energy and  
28  
29 180 protein intakes during stay on NICU between pre-implementation and intervention periods, and (ii)  
30  
31 181 differences in the change in weight and head circumference standard deviation scores (SDS) between  
32  
33 182 birth and discharge. These data were collected by entering infant chart data on fluid and feed intake into  
34  
35 183 a specially designed spreadsheet, which was pre-programmed with the nutrient content of feeds and  
36  
37 184 fluids available on the NICU, and automatically calculated daily energy and protein intakes for each  
38  
39 185 infant. Growth data were collected in a similar manner and converted to SDS using the LMS growth add  
40  
41 186 in for Microsoft Excel using reference data from the UK-WHO Newborn Infant Close Monitoring growth  
42  
43 187 chart. Differences in patient outcomes were also detected by monitoring routinely collected data on  
44  
45 188 mortality, morbidity (e.g. necrotising enterocolitis; chronic lung disease; retinopathy of prematurity;  
46  
47 189 severe Intraventricular haemorrhage; late onset sepsis) and length of stay.  
48  
49  
50  
51  
52

53 190 **Guideline normalization and compliance.** Measures of nutritional processes were extracted from  
54  
55 191 patient charts at the time of nutritional data entry: time of starting enteral feeds, time of starting PN,  
56  
57  
58  
59  
60

1  
2  
3 192 time of starting breast milk fortifier and type of feed at discharge. Audits of compliance with the  
4  
5 193 nutrition guideline were carried out throughout the full implementation period, and again at the end of  
6  
7  
8 194 the post-implementation period [16]. Audits were carried out every two months in the implementation  
9  
10 195 phase, and once in the post-implementation phase. Measures of the normalization of guideline  
11  
12 196 compliance were made using a questionnaire based on the NPT online toolkit  
13  
14 197 ([www.normalizationprocess.org](http://www.normalizationprocess.org)). This was adapted to ensure that questions related to implementing  
15  
16 198 and embedding the nutrition guideline in practice. This was made available to staff online using  
17  
18 199 [www.freesurveys.com](http://www.freesurveys.com). Respondents were asked to score their level of agreement with each of the 16  
19  
20 200 items between one and ten. This provided overall scores for each of the four domains of NPT (sense-  
21  
22 201 making, participation, action and monitoring). Staff completed questionnaires anonymously.  
23  
24  
25  
26

27 202 **Statistical analysis.** Descriptive statistics was used to summarise the demographic and outcome  
28  
29 203 variables. The outcome variables were tested for normality using the Kolmogorov–Smirnov test in order  
30  
31 204 to help determine the nature of the analysis methods used, with  $p < 0.05$  indicating that the tested  
32  
33 205 variable distribution differed from a normal distribution. For normally distributed continuous variables,  
34  
35 206 the mean and standard deviation were calculated, with the median and interquartile range calculated  
36  
37 207 for other continuous variables. Distribution of categorical variables was presented as frequency and  
38  
39 208 percentage. Comparison of daily nutrient intake and growth data between periods was carried out using  
40  
41 209 general linear models with mixed effects. This statistical technique accounts for repeated measures in  
42  
43 210 the same infant, allowing the addition of other potentially confounding variables (sex, gestational age at  
44  
45 211 birth and birth weight) and subsequent adjustment of the model. Post-hoc Tukey’s test was used to  
46  
47 212 adjust significance values in view of multiple comparisons. For normally distributed data, a type of  
48  
49 213 general linear model was used, whilst for non-normally distributed data a type of generalized linear  
50  
51 214 model was used in which repeated effects are considered random effects.  
52  
53  
54  
55  
56  
57  
58  
59  
60

1  
2  
3 215 Mortality and morbidity data and other dichotomous outcomes were compared across study periods  
4  
5 216 using  $X^2$  tests (or Fishers Exact test where numbers were low). Continuous process outcome measures  
6  
7  
8 217 were compared across study periods using either a two-way ANOVA (for normally distributed data) or  
9  
10 218 the Kruskal-Wallis test (for non-normally distributed data). If significant differences were found then  
11  
12 219 comparisons between pairs of groups were further analysed with post hoc adjustment by Tukey's test  
13  
14 220 (normally distributed data) or multiple Mann-Whitney-U tests (non-normally distributed data).  
15  
16  
17  
18 221 Guideline compliance audit results and measures of the 'normalisation' of practice (using scores from  
19  
20 222 the online NPT questionnaire) were summarised as mean scores and plotted over time. Multiple linear  
21  
22 223 regression was used to describe the nature of the relationship between mean percentage audit  
23  
24 224 compliance and NPT scores over time. A similar approach was then used to relate mean percentage  
25  
26 225 audit compliance and NPT scores to the primary infant outcome measures. Plots of mean percentage  
27  
28 226 audit compliance and NPT scores were overlaid with plots of energy intakes, protein intakes and the  
29  
30 227 differences in weight and head circumference SDS between birth and discharge over time during the  
31  
32 228 intervention period. The analyses were carried out using Stata IC v12.3 (Stata Corp) and SAS 9.3 (SAS  
33  
34 229 Institute Inc.).  
35  
36  
37  
38  
39  
40  
41  
42  
43  
44

## 232 RESULTS

45  
46 233 **Measures of Infant Outcomes.** Table 1 summarises the sex, gestational age at birth and birth weight of  
47  
48 234 infants in each study period. CRIB II[17] scores are also shown as in indication of illness severity. CRIB II  
49  
50 235 scores were not available for all infants and the numbers available with CRIB scores are also shown in  
51  
52 236 Table 2. There were no significant differences in sex, birth weight or gestational age between groups.  
53  
54  
55 237 There was a significant difference in CRIB II scores between groups ( $p=0.008$ ), with post hoc pairwise  
56  
57  
58  
59  
60

238 testing using Tukey's method revealing that only group D was significantly different (higher) from all the  
 239 others. This suggests an increased level of illness severity in group D when interpreting results.

240

| Period                                             | n  | Male (%)  | Mean Birth weight (SD) | Mean Gestational Age (SD) | Mean CRIB II (SD), n |
|----------------------------------------------------|----|-----------|------------------------|---------------------------|----------------------|
| A. Pre-implementation period (Jan 2011 – Jul 2011) | 52 | 23 (44.2) | 1.084 (0.270)          | 29.2 (2.6)                | 7.0 (3.6), 30        |
| B. Partial implementation period (Aug – Dec 2011)  | 36 | 18 (50)   | 1.029 (0.311)          | 29.2 (2.9)                | 6.4 (3.9), 20        |
| C. Main Intervention Period (Jan – Dec 2012)       | 75 | 37 (49.3) | 0.998 (0.269)          | 28.7 (3.0)                | 6.9 (2.5), 44        |
| D. Post-implementation period (Jan – Jun 2013)     | 35 | 22 (62.9) | 0.924 (0.261)          | 28.1 (2.8)                | 9.7 (3.2), 18        |
| p value for difference between groups (ANOVA)      |    | 0.392*    | 0.066                  | 0.290                     | <b>0.008</b>         |

**Table 1:** Infant Characteristics in each study group (SD-Standard Deviation) \*p value is for Chi<sup>2</sup>

241

| Outcome                              | Mean nutritional process audit compliance |                          |
|--------------------------------------|-------------------------------------------|--------------------------|
|                                      | Model with Time Excluded                  | Model with Time Included |
| Mean NPT Score Coefficient (p value) | 0.95 (0.002)                              | 0.40 (0.031)             |
| Time coefficient (p value)           | Omitted                                   | 0.72 (<0.0001)           |
| p value for model                    | 0.0018                                    | <0.0001                  |
| r for model                          | 0.2098                                    | 0.8076                   |
| r <sup>2</sup> for model             | 0.044                                     | 0.6522                   |

**Table 2:** Results of linear regression for mean audit compliance measures and mean NPT scores over time.

242

243 **Nutrient Intakes over time.** When compared with baseline data, progressive increases in protein intake  
 244 were observed over the course of the study. **Figures 3a-d** show the results of the generalised linear

1  
2  
3 245 modelling analysis for median daily nutrient intakes for each of energy (kcal/kg/day), protein (g/kg/day),  
4  
5 246 energy (as a percentage of RRI) and protein (as a percentage of RRI) respectively. Using Tukey's test to  
6  
7  
8 247 compare the difference between each period, there were significant improvements in protein intake in  
9  
10 248 period B and C compared to period A (both  $p < 0.001$ ), and this was sustained beyond the intervention  
11  
12 249 into period D ( $p < 0.01$  vs periods A and B). In particular, there was a significant increase protein intake  
13  
14 250 between the intervention planning phase (B) and the post implementation phase (D).  
15  
16  
17

18 251 **Growth over time** The results of the general linear model using mixed effects for the changes in weight  
19  
20 252 and head circumference SDS in each study period are shown in **Figure 4**. Using Tukey's test to compare  
21  
22 253 the difference between each period, there was a significant and sequential improvement in the change  
23  
24 254 in standard deviation score from birth (cSDS) for weight in period B and C compared to period A (both  
25  
26 255  $p < 0.01$ ), which again were sustained post implementation in period D ( $p < 0.001$  vs periods A and B). This  
27  
28 256 demonstrates that there was a sequential improvement in the difference in weight SDS between birth  
29  
30 257 and discharge in each study period during the study. There was a non-significant improvement in the  
31  
32 258 cSDS for head circumference (HC) across the study.  
33  
34  
35  
36

37 259 **Mortality and Morbidity.** No significant differences were detected in the rates of mortality, chronic lung  
38  
39 260 disease, necrotising enterocolitis, severe intraventricular haemorrhage, retinopathy of prematurity and  
40  
41 261 late onset infection.  
42  
43  
44  
45 262

#### 48 263 **Professional behaviour change and practice implementation**

49  
50  
51 264 **Timing of commencement of feeds and types of feed.** There were no significant differences in the  
52  
53 265 number of babies receiving breast milk, preterm formula, term formula or mixed feeding at discharge  
54  
55 266 between phases of the study. There were no significant changes in the proportion of breast milk fed  
56  
57  
58  
59  
60

1  
2  
3 267 infants receiving fortifier, nor were their differences in the time to start enteral feeds or the time of  
4  
5 268 starting fortifier in infants receiving breast milk between study periods. However, there were differences  
6  
7  
8 269 in the median time to starting parenteral nutrition between the phases of the study. In the baseline or  
9  
10 270 control phase of the study this was 15 hrs. Over the pre-implementation and implementation phases of  
11  
12 271 the study this reduced to nine hours. In the post implementation phase this rose to 12 hours. A  
13  
14  
15 272 significant difference between study phases was detected using the Kruskal-Wallis test ( $p=0.013$ ).

16  
17  
18 273 **Adherence to Guideline.** Bimonthly guideline compliance audits – described in Figure 2 – during the  
19  
20 274 intervention phase and at the end of the post-implementation phase showed that mean compliance  
21  
22 275 improved incrementally across the implementation phase, but there was a slight decrease in compliance  
23  
24  
25 276 at the final audit in July 2013. Linear regression of mean nutritional audit compliance during the 12  
26  
27 277 months of the intervention period demonstrated a significant linear increase over time, with a  
28  
29 278 regression coefficient of 1.1 ( $r=0.92$ ,  $p=0.009$ ).

30  
31  
32 279 **Normalisation Process Theory Scores.** Taking into account participant dropout due to staff turnover,  
33  
34 280 response rates to the NPT Toolkit questionnaire peaked at 74% in May 2012, falling to 27% in the final  
35  
36  
37 281 questionnaire in July 2013. Details regarding the number and type of respondents can be seen in **table**  
38  
39 282 **3. Figure 5** shows NPT scores as radar plots for each time period ; in general, the fuller the radar plot,  
40  
41 283 the greater extent to which staff felt that the practices were part of 'normal practice' at that time. Radar  
42  
43 284 plots generally become fuller over time, though some key areas of the plots were less full at different  
44  
45 285 time points, indicating areas for improvement. The items relating to collective action and reflexive  
46  
47 286 monitoring were scoring lower early in the intervention period, indicating that staff could not see the  
48  
49 287 benefit of the intervention in their work. In order to address this, the results of the study to date were  
50  
51 288 displayed around the staff areas of NICU in August 2012, with a subsequent improvement in the related  
52  
53 289 NPT scores. There was a significant linear increase in mean NPT score over time (coefficient=0.031,  
54  
55  
56  
57  
58  
59  
60

1  
2  
3 290  $r=0.15$ ,  $p=0.023$ ), though this dropped off during the post-implementation phase. **Figure 6** shows that  
4  
5 291 global NPT scores and guideline compliance increased together over time and then flattened out in the  
6  
7 292 post implementation phase. Linear regression analysis showed that there was a significant association  
8  
9 293 between mean global NPT scores and audit compliance through the intervention development,  
10  
11 294 implementation and post-implementation phases of the study with a coefficient of 0.95 ( $r=0.21$ ,  
12  
13 295  $p=0.002$ , see table 2). The addition of time as a variable into the linear regression models (to account for  
14  
15 296 the repeated measures nature of the data) is also shown in table 2. The addition of time significantly  
16  
17 297 contributed to the increases in compliance over the study and increased the predictive value of the  
18  
19 298 model, though despite this the mean NPT scores remained a significant predictor, showing that the  
20  
21 299 measures of normalisation using NPT are associated with measures of clinical practice. Linear regression  
22  
23 300 using the mean individual construct scores for NPT showed a significant association with the mean audit  
24  
25 301 scores and participants' capacity to monitor the effects of their actions (*reflexive monitoring*), both  
26  
27 302 before and after adjustment for the effect of time (coefficients of 0.89 and 0.51,  $p=0.034$  and  $p=0.044$   
28  
29 303 with and without adjustment for time respectively).  
30  
31  
32  
33  
34  
35

| Time Period                     | Mar-12    | May-12    | Jul-12    | Sep-12    | Nov-12   | Jan-13   | Jul-13   |
|---------------------------------|-----------|-----------|-----------|-----------|----------|----------|----------|
| Number of Respondents           | 44        | 52        | 39        | 26        | 24       | 18       | 16       |
| Percentage Response Rate        | 57.9      | 74.3      | 58.2      | 41.3      | 40.7     | 31       | 27       |
| Number (%) Consultants          | 4 (9.1)   | 4 (7.7)   | 4 (10.3)  | 4 (15.4)  | 4 (16.7) | 3 (16.7) | 4 (25)   |
| Number (%) Junior Doctors/ANNPs | 1 (2.3)   | 3 (5.8)   | 3 (7.7)   | 0 (0)     | 0 (0)    | 0 (0)    | 0 (0)    |
| Number (%) Pharmacists          | 1 (2.3)   | 1 (1.9)   | 1 (2.6)   | 0 (0)     | 0 (0)    | 0 (0)    | 0 (0)    |
| Number (%) Band 7 Nurses        | 4 (9.1)   | 4 (7.7)   | 2 (5.1)   | 3 (11.5)  | 5 (20.8) | 2 (11.1) | 2 (12.5) |
| Number (%) Band 6 Nurses        | 10 (22.7) | 9 (17.3)  | 6 (15.4)  | 7 (26.9)  | 6 (25.0) | 5 (27.8) | 4 (25.0) |
| Number (%) Band 5 Nurses        | 19 (43.1) | 23 (44.2) | 18 (46.2) | 10 (38.5) | 6 (25.0) | 5 (27.8) | 4 (25)   |
| Number (%) Band 4 Nurses        | 2 (4.6)   | 4 (7.7)   | 2 (5.1)   | 1 (3.9)   | 1 (4.2)  | 0 (0)    | 2 (12.5) |



|                                   |         |         |         |          |         |         |         |
|-----------------------------------|---------|---------|---------|----------|---------|---------|---------|
| Number (%) Band 3 Nurses or lower | 3 (6.8) | 4 (7.7) | 3 (7.7) | 1 (3.85) | 2 (8.3) | 1 (5.6) | 1 (6.3) |
|-----------------------------------|---------|---------|---------|----------|---------|---------|---------|

**Table 3:** Number of respondents and percentage response rate for each NPT questionnaire

304

## 305 DISCUSSION

306 We evaluated the effects of guideline implementation by measuring objective changes in nutrition  
 307 intake. These data are important in their own right, but can also be used to corroborate subjective self-  
 308 reports of behaviour change and practice implementation by staff. Objective improvements in nutrient  
 309 intake and weight gain were detected in infants across the four data collection periods. Against this  
 310 background, mean audit guideline compliance and NPT scores both increased in a linear fashion over  
 311 time. Impressively, mean guideline compliance was in excess of 75% throughout the intervention period,  
 312 peaking at 85%. The headline result of this study is that implementation of the guideline was  
 313 successfully achieved, and that activities associated with specific intervention components were  
 314 routinely embedded in workflow within the NICU.

315 This paper has described the successful implementation of a nutrition guideline for preterm infants in  
 316 NICU, leading to sustained change in practice and improved nutritional outcomes. During the time this  
 317 study was active, other groups have used similar approaches in the preterm population in order to try  
 318 and improve infant growth in NICU [18, 19]. They also used before and after study designs, but did not  
 319 include a process evaluation. Our study has shown that implementing a facilitated nutrition guideline in  
 320 NICU using a multifaceted intervention improved protein intake and weight gain in preterm infants. Our  
 321 process evaluation demonstrates that using NPT to develop and guide the implementation process can  
 322 lead to high compliance with guidelines and changes in practice that are sustained beyond the initial  
 323 intervention period. The results also show that measures of normalisation using the NPT toolkit  
 324 correlate well with measures of clinical practice in real life, and suggest that NPT may therefore offer an

1  
2  
3 325 effective way of measuring and guiding the implementation process. Effectively implementing the  
4  
5 326 components of this intervention significantly improved both protein intake and weight gain, and  
6  
7  
8 327 appeared to prevent the 'expected' fall of around 1.5-2 SDS for weight between birth and discharge  
9  
10 328 reported in other studies [20, 21]. This may be clinically relevant; for example, it may lead to improved  
11  
12 329 neurodevelopmental outcomes [22-24]. Improvement in weight gain and protein intake appears to  
13  
14 330 continue into the post implementation period, suggesting that improvements were sustained beyond  
15  
16 331 the main intervention period.

17  
18  
19  
20 332 In the present study, audits of guideline compliance were used in combination with the NPT toolkit. The  
21  
22 333 audits measured how well the guideline was put into practice, and the toolkit provided insight into how  
23  
24 334 well the intervention was being integrated into routine care by staff and identified areas where more  
25  
26 335 work was needed to aid implementation. NPT was used prospectively for the first time in this study to  
27  
28 336 develop and drive the intervention, rather than retrospectively assessing the implementation process. In  
29  
30 337 particular, the guidelines were aimed at encouraging *coherence* and *cognitive participation* by being  
31  
32 338 clear about the reasoning behind the approaches used and how to use them. Similarly, the nutrition  
33  
34 339 team, nurse champions and nutrition ward round aimed to provide feedback to aid *reflexive monitoring*.  
35  
36 340 Audit compliance generally improved over the course of the intervention period, and was around 80%,  
37  
38 341 which is exceptionally high for studies of implementation. NPT scores generally increased over time,  
39  
40 342 suggesting the intervention was becoming 'normalised' into practice. While the use of the NPT Toolkit to  
41  
42 343 measure normalisation in this study was novel and experimental, it seems that the measure of  
43  
44 344 'normalisation' provided by the NPT toolkit does relate to practice changes in the 'real world'. Here,  
45  
46 345 subjective self-reports by staff related well to objective measures of guideline compliance. Global NPT  
47  
48 346 scores were high even at the start of the intervention, suggesting that staff felt the intervention became  
49  
50 347 embedded into routine care rapidly  
51  
52  
53  
54  
55  
56  
57  
58  
59  
60

1  
2  
3 348 A notable result of this study is the importance of reflexive monitoring of implementation progress by  
4  
5 349 staff. This was significantly associated with audit compliance ( $r = 0.25$ ). However, it accounted for 6% of  
6  
7  
8 350 the variation in audit compliance and it had an effect size of an improvement of 0.9% audit compliance  
9  
10 351 for every point in global NPT scores. Seeing the impact of personal action functions as a feedback  
11  
12 352 mechanism, and such 'feedback loops' are likely to be responsible for the efficacy of professional  
13  
14 353 interventions such as 'audit and feedback' and 'educational outreach' from other health professionals  
15  
16  
17 354 [10]. Both of these were central components of the intervention. These findings are also consistent with  
18  
19 355 those of a previous theory-led overview of systematic reviews of professional interventions using NPT by  
20  
21 356 our group, which showed that those interventions that emphasised *reflexive monitoring* were more  
22  
23 357 likely to be successful [10]. Showing staff the results of the study to date during the main  
24  
25 358 implementation period in response to low *reflexive monitoring* scores demonstrates the utility of NPT to  
26  
27 359 identify issues and make implementation a more dynamic process. It also illustrates how addressing  
28  
29 360 such issues results in responsive changes that can be seen in subsequent NPT scores, suggesting that  
30  
31 361 NPT offers a way to both *measure* and *guide* change.

32  
33  
34  
35  
36 362 We have previously discussed the importance of context in relation to implementation, suggesting that  
37  
38 363 NPT is also able to provide a lens through which to consider the interactions between context and  
39  
40 364 complex interventions [7]. We proposed that the *plasticity* of interventions and the *elasticity* of the  
41  
42 365 context into which they were introduced played a significant part in the degree of implementation  
43  
44 366 success. Using NPT in the present study to both develop and guide the implementation process, perhaps  
45  
46 367 helped overcome the issues with the complex context of the NICU, providing contemporaneous  
47  
48 368 feedback on the barriers to implementation and allowing a degree of plasticity of the intervention itself.  
49  
50 369 This process was also facilitated by the focus groups prior to implementation, allowing potential barriers  
51  
52 370 to be overcome by alterations in the intervention components and the way in which they were  
53  
54  
55  
56  
57  
58  
59  
60

1  
2  
3 371 delivered. In addition, the focus groups suggested a desire from staff for more consistency in nutritional  
4  
5 372 care, and this in turn is likely to have improved the elasticity of the host context, facilitating *normative*  
6  
7 373 *restructuring* around the intervention and aiding implementation. This may explain the high degree of  
8  
9  
10 374 compliance and normalisation seen in the present study.

11  
12  
13 375 There were some limitations to this study. As a controlled before and after study, it is not possible to be  
14  
15 376 sure if any of the changes seen during the study are a direct result of the intervention. As this was not a  
16  
17 377 randomised controlled trial, it cannot control for causal mechanisms and confounders, and as such it is  
18  
19 378 subject to limits of interpretation. Whilst the statistical analyses show associations between the  
20  
21 379 progressive implementation of the intervention and changes in outcomes, it cannot prove causation. A  
22  
23 380 further limitation relates to having adequate patient numbers and statistical power to detect important  
24  
25 381 differences, which may possibly account for the failure to detect a clinically significant improvement in  
26  
27 382 head circumference. The study was also not powered to detect differences in mortality and morbidity  
28  
29 383 data. An important limitation of the NPT toolkit questionnaires used in this study is that staff responses  
30  
31 384 may have been biased by their beliefs about the expectations of the study team, which is a common  
32  
33 385 problem in such studies.  
34  
35  
36  
37  
38  
39  
40  
41  
42

386

## 387 **CONCLUSION**

43  
44  
45 388 This study used nutrition in the NICU as a vehicle to understand implementation in a complex  
46  
47 389 environment. It has demonstrated that the implementation of the facilitated guideline was associated  
48  
49 390 with improvements in infant protein intakes and weight. The use of NPT to guide and monitor the  
50  
51 391 implementation of the intervention resulted in high guideline compliance and a degree of  
52  
53 392 'normalisation' of the complex intervention into routine care. Measures of normalisation using NPT  
54  
55  
56  
57  
58  
59  
60

1  
2  
3  
4  
5  
6  
7  
8  
9  
10  
11  
12  
13  
14  
15  
16  
17  
18  
19  
20  
21  
22  
23  
24  
25  
26  
27  
28  
29  
30  
31  
32  
33  
34  
35  
36  
37  
38  
39  
40  
41  
42  
43  
44  
45  
46  
47  
48  
49  
50  
51  
52  
53  
54  
55  
56  
57  
58  
59  
60

393 appear to relate to objective measures of practice, suggesting that NPT could provide a useful way of  
394 understanding the dynamics of implementation processes in complex clinical environments.  
395

For peer review only

1  
2  
3 396 **LIST OF ABBREVIATIONS:**  
4  
5

6  
7 397 ALP – Alkaline Phosphatase; ESPGHAN - European Society for Pediatric Gastroenterology; Hepatology  
8  
9 398 and Nutrition; NICU - Neonatal Intensive Care Unit; NPT – Normalization Process Theory; PN –  
10  
11 399 Parenteral Nutrition; RNI – Reference Nutrient Intake; RRI – Reasonable Range of Intake; WHO – World  
12  
13 400 Health Organisation.  
14

15  
16  
17 401  
18  
19

20  
21 402 **DECLARATIONS**  
22

23  
24 403 *Ethics approval and consent to participate*  
25

26  
27 404 The study was approved by an NHS Research Ethics Committee, ('Oxford 'B' Reference 11/sc/0365)  
28  
29

30 405 *Consent for publication*  
31

32  
33 406 Not applicable  
34

35  
36 407 *Availability of data and material*  
37

38  
39 408 The datasets generated and/or analysed during the current study are not publicly available due to  
40  
41 409 further pending publications and current approvals, but may be available from the corresponding author  
42  
43 410 on reasonable request. An implementation toolkit and a validated instrument to measure  
44  
45 411 implementation processes using Normalisation Process Theory are available at  
46  
47 412 [www.normalizationprocess.org](http://www.normalizationprocess.org).  
48  
49

50  
51  
52 413 *Competing interests*  
53  
54  
55  
56  
57  
58  
59  
60

1  
2  
3 414 All authors have completed the ICMJE uniform disclosure form at [www.icmje.org/coi\\_disclosure.pdf](http://www.icmje.org/coi_disclosure.pdf) and  
4  
5 415 declare: no support from any organisation for the submitted work; CRM is an original author of  
6  
7  
8 416 Normalization Process Theory; no other relationships or activities that could appear to have influenced  
9  
10 417 the submitted work.  
11

12  
13 418 *Funding*  
14

15  
16 419 Work leading to this paper was funded by the National Institute for Health Research (NIHR) Biomedical  
17  
18 420 Research Centre, Southampton. MJ's contribution was partly supported by an NIHR Doctoral Research  
19  
20 421 Fellowship DRF-2012-05-272, and CRM's contribution was partly supported by NIHR CLAHRC Wessex  
21  
22 422 and partly by ESRC Grant ES-062-23-3274. We gratefully acknowledge the financial support from these  
23  
24 423 agencies. Funders had no role in the design of the study and collection, analysis and interpretation of  
25  
26 424 the data or in writing the manuscript, and the paper does not necessarily represent their views.  
27

28  
29  
30  
31 425 *Authors' contributions*  
32

33  
34 426 MJJ contributed to the design of the study, carried out data analysis and interpreted all data. He was  
35  
36 427 responsible for drafting the article and revising it critically for important intellectual content. He is  
37  
38 428 guarantor. AAL, FP, HWC contributed to the conception and design of the study and interpretation of  
39  
40 429 data. They revised the article critically for important intellectual content. BDD supervised the statistical  
41  
42 430 analysis and developed the statistical model used for longitudinal data analysis. He contributed to the  
43  
44 431 interpretation of data and revised the article critically for important intellectual content. CJP and CRM  
45  
46 432 contributed to the design of the study, the use of NPT in the study and interpretation of data. They  
47  
48 433 revised the article critically for important intellectual content.  
49  
50

51  
52  
53 434 *Acknowledgements*  
54  
55  
56  
57  
58  
59  
60

1  
2  
3 435 We would like to further acknowledge the work of Amanda Beedham and Karen Hayllar at Co.Efficient  
4  
5 436 Consultancy, who provided expertise in the development phase and were contracted to develop and  
6  
7  
8 437 build the electronic tool for calculating and storing daily nutrient intake and growth data. We would also  
9  
10 438 like to acknowledge Miss Zoe Lansdowne and Dr Amanda Bevan (Neonatal and Paediatric Pharmacists,  
11  
12 439 University Hospital Southampton NHS Foundation Trust) for their help with the parenteral nutrition  
13  
14 440 solution data used in the electronic tool.

15  
16  
17  
18 441 We would also like to acknowledge Jenny Pond, Jane Rhodes-Kitson, Charlotte Oates, Jenny Weddell  
19  
20 442 and, Linda Anderson, Christina Humphrey and Liz Blake for their help in data collection and in their roles  
21  
22 443 as nurse 'Champions for Nutrition'.  
23  
24  
25  
26 444

## 27 445 **FIGURE TITLES AND LEGENDS**

### 30 446 **Figure 1: The Model of Normalization Process Theory**

31 447 The four main constructs of NPT are shown in bold. Reproduced with permission [8]

### 34 448 **Figure 2: Study process flow chart**

### 36 449 **Figure 3: Bar graphs showing mean daily nutrient intakes across the four study periods**

37 450 Bars show mean daily Energy in kcal/kg/day (A), protein in g/kg/day (B), energy as a percentage of RRI  
38 451 (C) and protein as a percentage of RRI (D). Error bars represent 95% confidence intervals. Blue bars  
39 452 represent unadjusted data, while red bars are adjusted for sex, gestational age and weight at birth.  
40 453 \* $p < 0.05$  for difference vs period A, † $p < 0.05$  for difference vs period B, + $p < 0.05$  for difference vs period  
41 454 C. (RRI- reasonable range of intake)

### 44 455 **Figure 4: Bar graphs showing mean change in standard deviation score (SDS) across the four study periods**

45 456 Changes are from birth until discharge for weight (A) and head circumference (B). Error bars represent  
46 457 95% confidence intervals. Blue bars represent unadjusted data, whilst red bars are adjusted for sex,  
47 458 gestational age and weight at birth \* $p < 0.05$  for difference vs period A, † $p < 0.05$  for difference vs period  
48 459 B, + $p < 0.05$  for difference vs period C  
49 460

### 53 461 **Figure 5: Radar plots showing the mean score for each sub-construct of NPT**

54 462 Results from the NPT questionnaire taken throughout the course of the study.

### 56 463 **Figure 6: Relationship over time between mean NPT scores and percentage guideline compliance**



1  
2  
3  
4  
5  
6  
7  
8  
9  
10  
11  
12  
13  
14  
15  
16  
17  
18  
19  
20  
21  
22  
23  
24  
25  
26  
27  
28  
29  
30  
31  
32  
33  
34  
35  
36  
37  
38  
39  
40  
41  
42  
43  
44  
45  
46  
47  
48  
49  
50  
51  
52  
53  
54  
55  
56  
57  
58  
59  
60

464  
465  
466  
467

**ADDITIONAL FILES**

Additional File 1.pdf: Nutrition guideline used in this study

For peer review only

## 468 REFERENCES

- 469 1. Grimshaw JM, Eccles MP, Lavis JN, et al. Knowledge translation of research findings. *Implement Sci*  
470 2012;**7**:50 doi: 10.1186/1748-5908-7-50  
471 1748-5908-7-50 [pii][published Online First: Epub Date]|.
- 472 2. Eccles M, Mittman B. Welcome to Implementation Science. *Implementation Science* 2006;**1**(1):1 doi:  
473 10.1186/1748-5908-1-1[published Online First: Epub Date]|.
- 474 3. Tsang RC. *Nutrition of the preterm infant*. 2nd ed. ed. Cincinnati: Digital Educational Publishing, 2005.
- 475 4. Agostoni C, Buonocore G, Carnielli VP, et al. Enteral nutrient supply for preterm infants: commentary  
476 from the European Society of Paediatric Gastroenterology, Hepatology and Nutrition Committee  
477 on Nutrition. *J Pediatr Gastroenterol Nutr* 2010;**50**(1):85-91 doi:  
478 10.1097/MPG.0b013e3181adaee0[published Online First: Epub Date]|.
- 479 5. Embleton NE, Pang N, Cooke RJ. Postnatal malnutrition and growth retardation: an inevitable  
480 consequence of current recommendations in preterm infants? *Pediatrics* 2001;**107**(2):270-3  
481 6. Cooke RJ, Ainsworth SB, Fenton AC. Postnatal growth retardation: a universal problem in preterm  
482 infants. *Arch Dis Child Fetal Neonatal Ed* 2004;**89**(5):F428-30 doi: 10.1136/adc.2001.004044  
483 89/5/F428 [pii][published Online First: Epub Date]|.
- 484 7. May CR, Johnson M, Finch T. Implementation, context and complexity. *Implement Sci* 2016;**11**(1):141  
485 doi: 10.1186/s13012-016-0506-3  
486 10.1186/s13012-016-0506-3 [pii][published Online First: Epub Date]|.
- 487 8. May C, Finch T. Implementing, Embedding, and Integrating Practices: An Outline of Normalization  
488 Process Theory. *Sociology* 2009;**43**(3):535-54 doi: 10.1177/0038038509103208[published Online  
489 First: Epub Date]|.
- 490 9. May CR, Mair F, Finch T, et al. Development of a theory of implementation and integration:  
491 Normalization Process Theory. *Implementation Science* 2009;**4**(1):29 doi: 10.1186/1748-5908-4-  
492 29[published Online First: Epub Date]|.
- 493 10. Johnson MJ, May CR. Promoting professional behaviour change in healthcare: what interventions  
494 work, and why? A theory-led overview of systematic reviews. *BMJ Open* 2015;**5**(9):e008592 doi:  
495 10.1136/bmjopen-2015-008592  
496 bmjopen-2015-008592 [pii][published Online First: Epub Date]|.
- 497 11. Craig P, Dieppe P, Macintyre S, et al. *Developing and Evaluating Complex Interventions: New*  
498 *Guidance: Medical Research Council*, 2008.
- 499 12. Tabak RG, Khoong EC, Chambers DA, et al. Bridging research and practice: models for dissemination  
500 and implementation research. *Am J Prev Med* 2012;**43**(3):337-50 doi:  
501 10.1016/j.amepre.2012.05.024  
502 S0749-3797(12)00389-3 [pii][published Online First: Epub Date]|.
- 503 13. Murray E, Treweek S, Pope C, et al. Normalisation process theory: a framework for developing,  
504 evaluating and implementing complex interventions. *BMC medicine* 2010;**8**:63 doi:  
505 10.1186/1741-7015-8-63[published Online First: Epub Date]|.
- 506 14. Johnson MJ, Pearson F, Emm A, et al. Developing a new screening tool for nutritional risk in neonatal  
507 intensive care. *Acta Paediatr* 2015;**104**(2):e90-3 doi: 10.1111/apa.12855[published Online First:  
508 Epub Date]|.

- 1  
2  
3 509 15. Westbury JA, Johnson MJ, Pond JP, et al. Developing the role of the nurse as a link advisor for  
4 510 research and a champion for nutrition in the neonatal intensive care unit. *Journal of Neonatal*  
5 511 *Nursing* 2013;**19**:198 doi: <http://dx.doi.org/10.1016/j.jnn.2013.01.003>[published Online First:  
6 512 Epub Date]].
- 7  
8 513 16. Lee L, Girish S, van den Berg E, et al. Random safety audits in the neonatal unit. *Arch Dis Child Fetal*  
9 514 *Neonatal Ed* 2009;**94**(2):F116-9 doi: [adc.2007.131052](https://doi.org/10.1136/adc.2007.131052) [pii]  
10  
11 515 [10.1136/adc.2007.131052](https://doi.org/10.1136/adc.2007.131052)[published Online First: Epub Date]].
- 12 516 17. Parry G, Tucker J, Tarnow-Mordi W. CRIB II: an update of the clinical risk index for babies score.  
13 517 *Lancet* 2003;**361**(9371):1789-91 doi: [S0140-6736\(03\)13397-1](https://doi.org/10.1016/S0140-6736(03)13397-1) [pii]  
14  
15 518 [10.1016/S0140-6736\(03\)13397-1](https://doi.org/10.1016/S0140-6736(03)13397-1)[published Online First: Epub Date]].
- 16 519 18. Rochow N, Fusch G, Muhlinghaus A, et al. A nutritional program to improve outcome of very low  
17 520 birth weight infants. *Clin Nutr* 2012;**31**(1):124-31 doi: [10.1016/j.clnu.2011.07.004](https://doi.org/10.1016/j.clnu.2011.07.004)  
18  
19 521 [S0261-5614\(11\)00131-2](https://doi.org/10.1016/S0261-5614(11)00131-2) [pii][published Online First: Epub Date]].
- 20 522 19. Roggero P, Gianni ML, Orsi A, et al. Implementation of nutritional strategies decreases postnatal  
21 523 growth restriction in preterm infants. *PLoS One* 2012;**7**(12):e51166 doi:  
22 524 [10.1371/journal.pone.0051166](https://doi.org/10.1371/journal.pone.0051166)  
23  
24 525 [PONE-D-12-22771](https://doi.org/10.1371/journal.pone.0051166) [pii][published Online First: Epub Date]].
- 25 526 20. Ehrenkranz RA, Younes N, Lemons JA, et al. Longitudinal growth of hospitalized very low birth weight  
26 527 infants. *Pediatrics* 1999;**104**(2 Pt 1):280-9
- 27 528 21. Cole TJ, Statnikov Y, Santhakumaran S, et al. Birth weight and longitudinal growth in infants born  
28 529 below 32 weeks' gestation: a UK population study. *Arch Dis Child Fetal Neonatal Ed* 2013 doi:  
29 530 [10.1136/archdischild-2012-303536](https://doi.org/10.1136/archdischild-2012-303536)  
30  
31 531 [archdischild-2012-303536](https://doi.org/10.1136/archdischild-2012-303536) [pii][published Online First: Epub Date]].
- 32  
33 532 22. Ehrenkranz RA, Dusick AM, Vohr BR, et al. Growth in the neonatal intensive care unit influences  
34 533 neurodevelopmental and growth outcomes of extremely low birth weight infants. *Pediatrics*  
35 534 2006;**117**(4):1253-61 doi: [117/4/1253](https://doi.org/10.1177/0000634106287117) [pii]  
36  
37 535 [10.1177/0000634106287117](https://doi.org/10.1177/0000634106287117)[published Online First: Epub Date]].
- 38 536 23. Stephens BE, Walden RV, Gargus RA, et al. First-week protein and energy intakes are associated with  
39 537 18-month developmental outcomes in extremely low birth weight infants. *Pediatrics*  
40 538 2009;**123**(5):1337-43 doi: [123/5/1337](https://doi.org/10.1177/0000634109347123) [pii]  
41  
42 539 [10.1177/0000634109347123](https://doi.org/10.1177/0000634109347123)[published Online First: Epub Date]].
- 43 540 24. Chan SH, Johnson MJ, Leaf AA, et al. Nutrition and neurodevelopmental outcomes in preterm  
44 541 infants: a systematic review. *Acta Paediatr* 2016;**105**(6):587-99 doi:  
45 542 [10.1111/apa.13344](https://doi.org/10.1111/apa.13344)[published Online First: Epub Date]].  
46  
47 543  
48  
49  
50  
51 544  
52  
53  
54  
55 545  
56  
57  
58  
59  
60

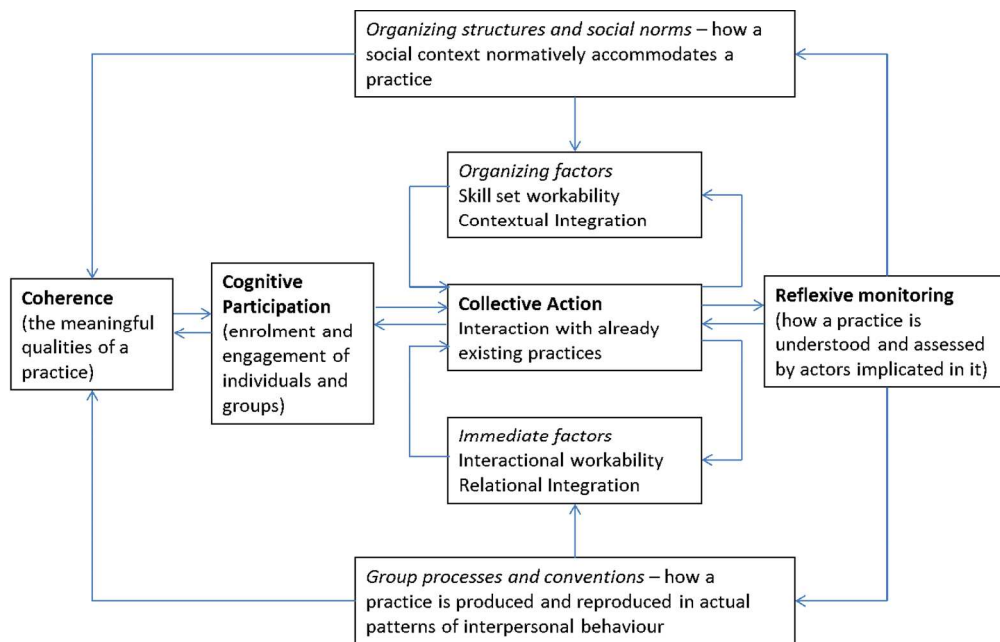

Figure 1: The Model of Normalization Process Theory  
The four main constructs of NPT are shown in bold. Reproduced with permission [8]

374x239mm (96 x 96 DPI)

View only

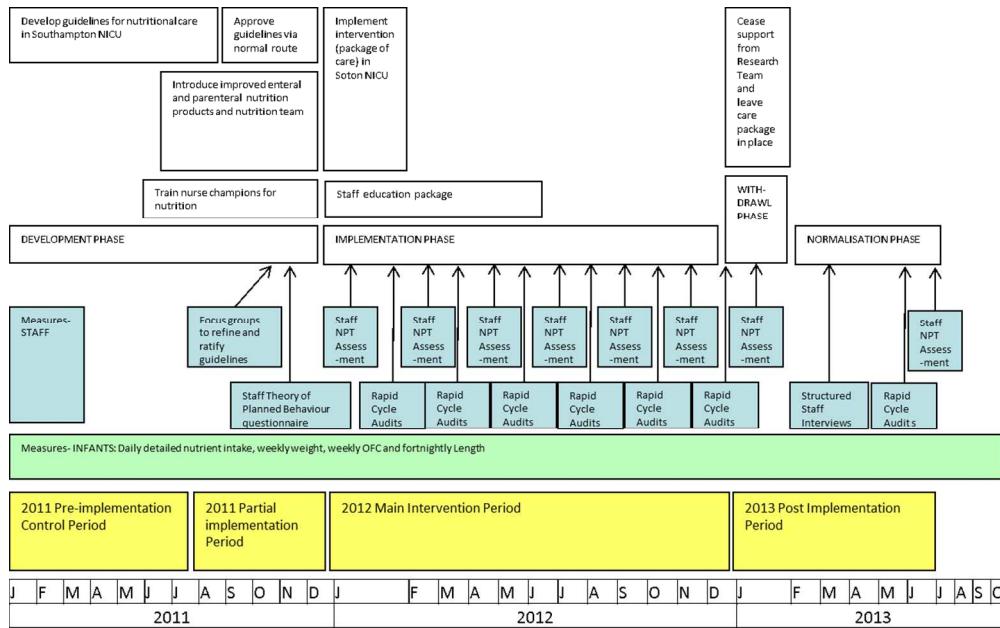

Figure 2: Study process flow chart

345x217mm (96 x 96 DPI)

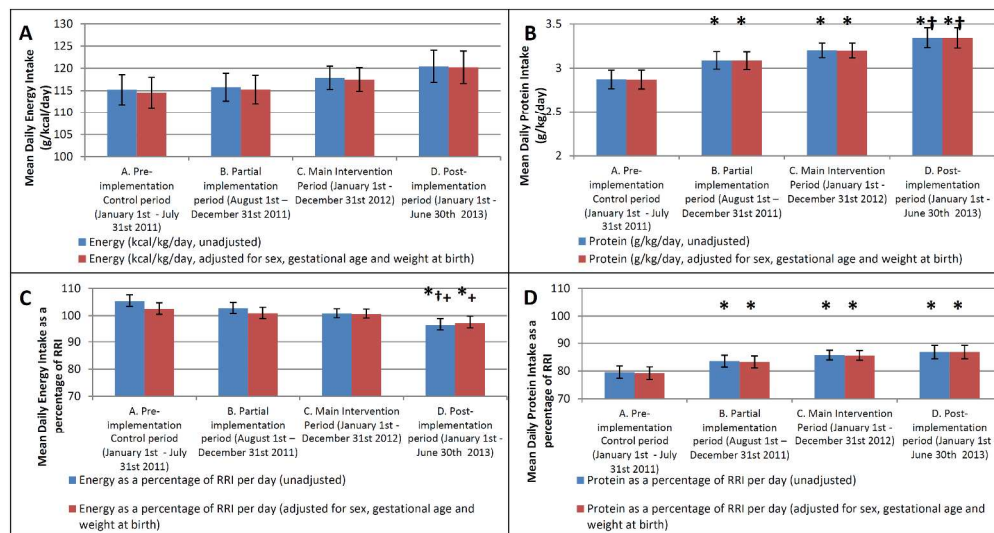

Figure 3: Bar graphs showing mean daily nutrient intakes across the four study periods. Bars show mean daily Energy in kcal/kg/day (A), protein in g/kg/day (B), energy as a percentage of RRI (C) and protein as a percentage of RRI (D). Error bars represent 95% confidence intervals. Blue bars represent unadjusted data, while red bars are adjusted for sex, gestational age and weight at birth. \*p<0.05 for difference vs period A, †p<0.05 for difference vs period B, ††p<0.05 for difference vs period C. (RRI=reasonable range of intake)

1157x613mm (96 x 96 DPI)

view only

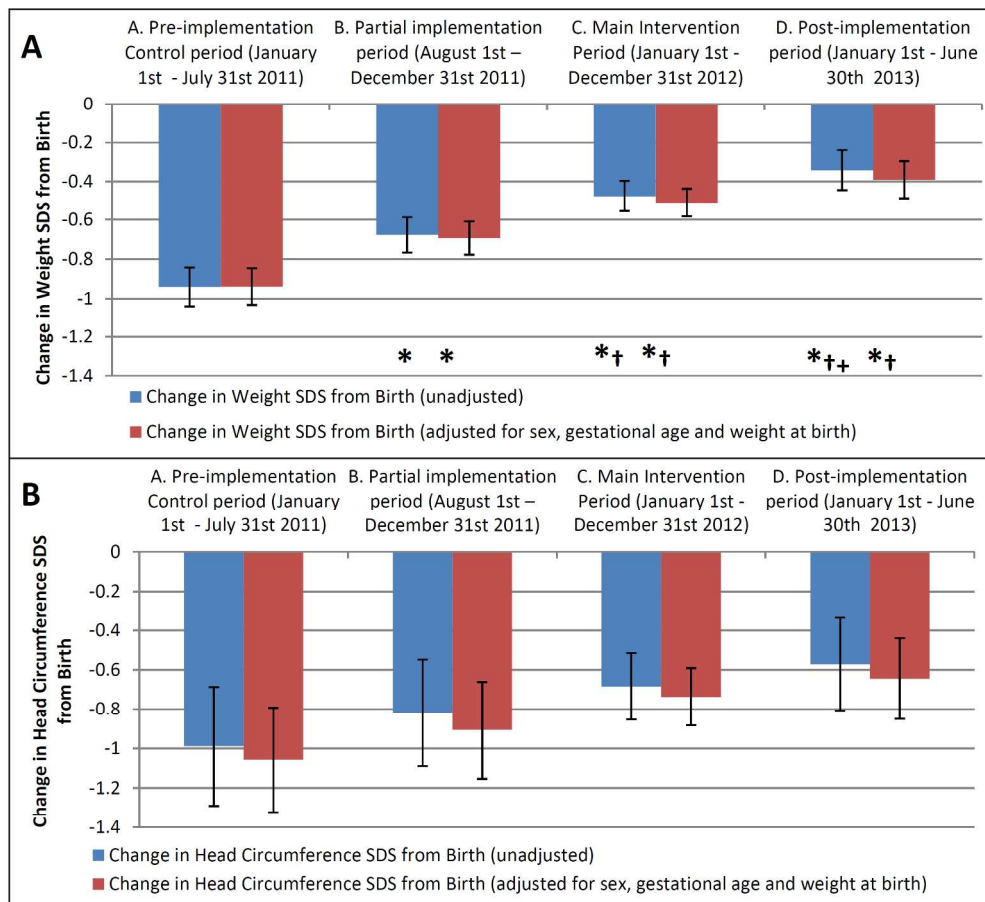

Figure 4: Bar graphs showing mean change in standard deviation score (SDS) across the four study periods. Changes are from birth until discharge for weight (A) and head circumference (B). Error bars represent 95% confidence intervals. Blue bars represent unadjusted data, whilst red bars are adjusted for sex, gestational age and weight at birth \*p<0.05 for difference vs period A, †p<0.05 for difference vs period B, +p<0.05 for difference vs period C

740x673mm (96 x 96 DPI)

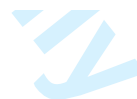

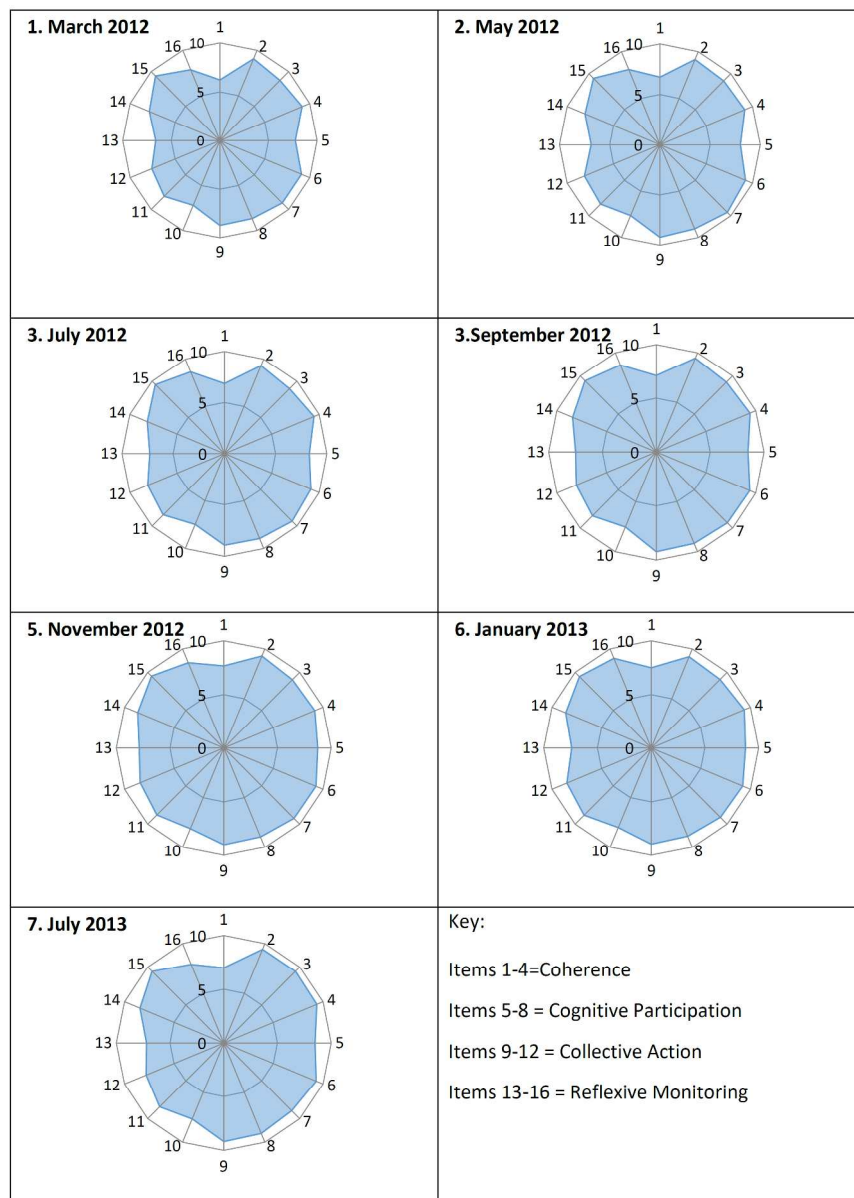

Figure 5: Radar plots showing the mean score for each sub-construct of NPT Results from the NPT questionnaire taken throughout the course of the study.

747x1039mm (96 x 96 DPI)



1  
2  
3  
4  
5  
6  
7  
8  
9  
10  
11  
12  
13  
14  
15  
16  
17  
18  
19  
20  
21  
22  
23  
24  
25  
26  
27  
28  
29  
30  
31  
32  
33  
34  
35  
36  
37  
38  
39  
40  
41  
42  
43  
44  
45  
46  
47  
48  
49  
50  
51  
52  
53  
54  
55  
56  
57  
58  
59  
60

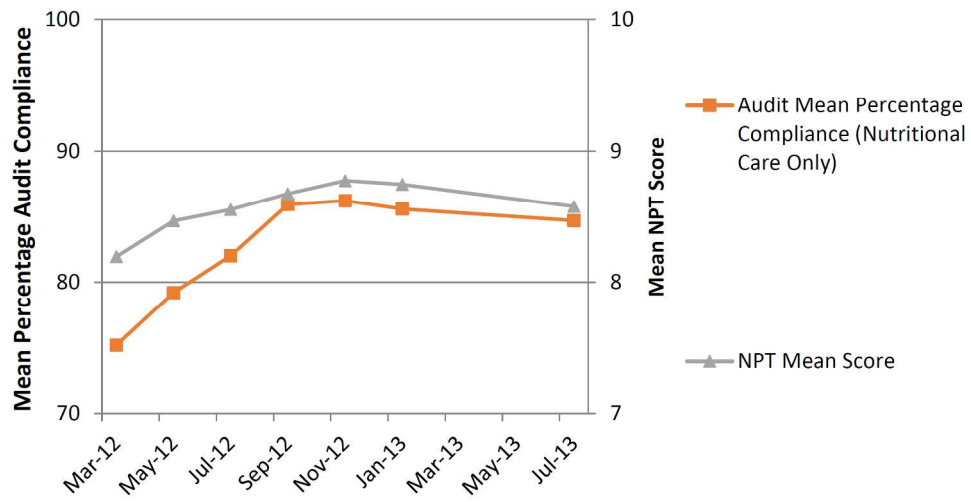

Figure 6: Relationship over time between mean NPT scores and percentage guideline compliance

702x365mm (96 x 96 DPI)

review only

1  
2  
3  
4  
5  
6  
7  
8  
9  
10  
11  
12  
13  
14  
15  
16  
17  
18  
19  
20  
21  
22  
23  
24  
25  
26  
27  
28  
29  
30  
31  
32  
33  
34  
35  
36  
37  
38  
39  
40  
41  
42  
43  
44  
45  
46  
47  
48  
49  
50  
51  
52  
53  
54  
55  
56  
57  
58  
59  
60

# Guidelines for the Nutritional Care of Infants in the Neonatal Unit

Version: 1.0

Issued: December 2011

Review date: December 2014

Author: Dr Alison Leaf

The procedural aspects of this guideline can be found in the document entitled:-

Guideline Proforma - **Guidelines for the Nutritional Care of Infants in the  
Neonatal Unit**

## Contents

| Paragraph         |                                                                                       | Page |
|-------------------|---------------------------------------------------------------------------------------|------|
|                   | <b>Executive Summary</b>                                                              | 3    |
| 1.                | Introduction                                                                          | 4    |
| 2.                | Definitions                                                                           | 5    |
| 3.                | Roles and Responsibilities                                                            | 6    |
| 4.                | Related Trust Documents                                                               | 7    |
| 5.                | Guideline                                                                             |      |
|                   | <b>1. Aims and objectives; audit points</b>                                           | 8    |
|                   | <b>2. Assessment and monitoring</b>                                                   |      |
|                   | i. Initial assessment: growth / risk category / screen                                | 9    |
|                   | ii. On-going assessment: growth / biochemistry / nutrition screening / nutrition team | 10   |
|                   | <b>3. Nutrient requirements</b>                                                       | 11   |
|                   | <b>4. Standard nutritional support of preterm and sick infants</b>                    | 12   |
|                   | a. Overview by risk group                                                             | 12   |
|                   | b. Parenteral nutrition                                                               | 13   |
|                   | i. Indications for PN                                                                 | 13   |
|                   | ii. Starting PN                                                                       | 13   |
|                   | iii. Stock PN solutions                                                               | 13   |
|                   | iv. Pharmacy-manufactured ('bespoke') PN                                              | 13   |
|                   | v. Reducing PN as feeds increase                                                      | 14   |
|                   | vi. Peripheral PN                                                                     | 14   |
|                   | vii. Cautions                                                                         | 14   |
|                   | c. Enteral nutrition                                                                  | 15   |
|                   | i. Starting feeds                                                                     | 15   |
|                   | ii. Choice of milk                                                                    | 15   |
|                   | iii. Advancing feeds                                                                  | 15   |
|                   | iv. Routine nutritional supplements                                                   | 16   |
|                   | v. Nutrition at discharge                                                             | 16   |
|                   | <b>5. Management of common gut and feeding problems</b>                               | 17   |
|                   | a. Feed intolerance / gastric residuals                                               | 17   |
|                   | b. Abdominal distension                                                               | 17   |
|                   | c. Suspected Necrotising Enterocolitis (NEC)                                          | 17   |
|                   | d. Suspected Gastro-oesophageal reflux (GOR)                                          | 17   |
|                   | e. Suspected Food Protein Intolerance                                                 | 17   |
|                   | <b>6. Management of babies with surgical bowel problems</b>                           | 18   |
|                   | <b>7. Flow Charts</b>                                                                 | 20   |
|                   | a. Starting and Increasing Feeds – High Risk Infants                                  | 20   |
|                   | b. Starting and Increasing Feeds – Moderate Risk Infants                              | 21   |
|                   | c. Management of common feed related problems                                         | 22   |
|                   | d. Choice of milk                                                                     | 23   |
|                   | <b>8. Tables</b>                                                                      | 24   |
|                   | a. Starting and increasing feeds                                                      | 24   |
|                   | b. Nutrient content of commonly used products                                         | 25   |
|                   | <b>9. Supporting Information</b>                                                      | 26   |
| 6.                | References                                                                            | 32   |
| <b>Appendices</b> |                                                                                       |      |
| Appendix 1        | Nutrient Requirements of preterm infants                                              | 35   |
| Appendix 2        | Neonatal Nutrition Screening Tool                                                     | 36   |

## Executive Summary

Good nutrition is important at all stages of life. Babies are born at a time of rapid growth and formation of body tissues and organs, yet immature metabolism means they are unable to cope with either excess or lack of nutrients. Detail in both the quantity and quality of nutrients is critically important.

There is good evidence that mother's breast milk confers many advantages to baby, mother and to the formation of the parental bond. As well as containing just the right nutrients for human development, breast milk contains many factors which promote immune function and enable healthy intestinal development. Breast milk and breast-feeding should be encouraged in almost all situations.

Preterm infants and those with congenital abnormalities or metabolic disorders may require nutrient supplements or special feeds, and may require a period of intravenous nutrition until the gut is able to support their needs.

Measuring growth and monitoring biochemical well-being is crucial to optimising nutrition in high risk individuals.

These guidelines aim to provide both practical and theoretical guidance for the optimal nutrition of sick and preterm infants in the NNU at Southampton.

## 1. Introduction

- Good early growth is essential for long term health and well-being of all babies.
- Achieving recommended nutrient intake in very low birth-weight and sick infants is difficult particularly in the first weeks of life and development of a significant nutrient deficit is common. It is then very difficult to 'catch up'.
- Protein intake is particularly difficult to achieve.
- These guidelines aim to support decision-making such that nutrient delivery can be optimised. Close monitoring of intakes, biochemical status and growth is essential to monitor how well this is achieved.
- ***Every feed and every day is important – being aware of daily intake of key nutrients is the first step to improving growth and development***
- SENNAT (Southampton Electronic Neonatal Nutrition Assessment Tool) has been developed to help us all measure and monitor nutrient intakes and growth

### These guidelines are based on recommendations of:

- Enteral nutrient supply for preterm infants: commentary from the European Society of Paediatric Gastroenterology, Journal of Pediatric Gastroenterology and Nutrition 2010[1]
- Nutrition of the Preterm Infant: Scientific basis and Practical Guidelines (second edition). Tsang RC, Uauy R, Koletzko B, Zlotkin S. Digital Educational Publishing 2005[2]
- Guidelines on Paediatric Parenteral Nutrition of the European Society of Paediatric Gastroenterology, Hepatology and Nutrition (ESPGHAN) and the European Society for Clinical Nutrition and Metabolism (ESPEN), Supported by the European Society of Paediatric Research (ESPR), Journal of Pediatric Gastroenterology and Nutrition 2005[3]
- Vermont Oxford Network 'Potentially Better Practices (PBPs) for Nutrition' as laid out in Pediatrics, 2003[4]
- Management and support of infant feeding in maternity facilities. Infant and young child feeding : model chapter for textbooks for medical students and allied health professionals., World Health Organisation 2009[5]
- Optimal feeding of low-birth-weight infants, World Health Organisation, 2006[6]
- UNICEF Baby Friendly Initiative, <http://www.unicef.org.uk/babyfriendly>

## 2. Definitions

|       |                                                                                      |
|-------|--------------------------------------------------------------------------------------|
| AREDF | Absent or Reversed End Diastolic Flow (in umbilical artery, seen on antenatal scans) |
| AXR   | Abdominal X-Ray                                                                      |
| BMF   | Breast Milk Fortifier                                                                |
| CPAP  | Continuous Positive Airways Pressure                                                 |
| D/C   | Discharge                                                                            |
| DBM   | Donor Breast Milk                                                                    |
| DH    | Department of Health                                                                 |
| ELBW  | Extremely Low Birth Weight (birth weight <1000g)                                     |
| FBC   | Full Blood Count                                                                     |
| g     | grams                                                                                |
| IU    | International Units                                                                  |
| IUGR  | Intrauterine Growth Restriction                                                      |
| IV    | Intravenous                                                                          |
| kcal  | kilocalories                                                                         |
| kg    | kilogram                                                                             |
| LBW   | Low Birth Weight (birth weight <2500g)                                               |
| LFT   | Liver Function Tests                                                                 |
| MBM   | Maternal Breast Milk                                                                 |
| mg    | milligram                                                                            |
| ml    | millilitre                                                                           |
| mmol  | millimole                                                                            |
| NBM   | Nil By Mouth                                                                         |
| NEC   | Necrotising Enterocolitis                                                            |
| NICU  | Neonatal Intensive Care Unit                                                         |
| NNU   | Neonatal Unit                                                                        |
| PBP   | Potentially Better Practice                                                          |
| PDA   | Patent Ductus Arteriosus                                                             |
| PDF   | Post Discharge Formula                                                               |
| PN    | Parenteral Nutrition                                                                 |
| RCT   | Randomised Controlled Trial                                                          |
| SD    | Standard Deviation                                                                   |
| TAT   | Trans-anastamotic Tube                                                               |
| TPN   | Total Parenteral Nutrition                                                           |
| U&E   | Urea and Electrolytes                                                                |
| VLBW  | Very Low Birth Weight (birth weight <1500g)                                          |
| VON   | Vermont Oxford Network                                                               |

### 3. Roles and Responsibilities

#### BREAST-FEEDING AND LACTATION SUPPORT

- All staff: awareness of Trust Policy and NNU Guidelines
- 'Breast-feeding babes' – Lead Sandy Jackson: expert guidance for mothers breast-feeding on the post-natal wards
- NNU lactation support team – Lead Jess Macfarlane: expert guidance for mothers breast-feeding and/or expressing milk in NNU

#### PARENTERAL NUTRITION

- All staff: awareness of need for PN in high risk infants
- Nursing staff: awareness of location of 'stock' PN in NNU and knowledge and skills for PN administration appropriate to nursing skill level
- Medical staff: awareness of PN supplies available and how to prescribe; awareness of potential complications of PN and how to avoid
- Pharmacists: Amanda Bevan and Zoe Lansdowne: expertise in detailed composition of PN solutions and provision of PN in different situations on NNU

#### ENTERAL NUTRITION

- All staff: support for mothers in choice of feeding
- All staff: awareness of choices for enteral nutrition: maternal breast milk / breast-feeding; donor breast milk / milk bank; standard infant formula; formulas for preterm infants; special formulas for infants with specific gut or feeding problems
- Neonatal Dietitian (Anita Emm): expert knowledge of composition of breast milk and alternatives and guidance on making appropriate choices
- Surgical team: expert knowledge on potential feeding challenges in infants with congenital or acquired abnormalities of the gut, particularly following surgery.

#### FEEDING DIFFICULTIES

- All staff: awareness of common feeding difficulties of preterm infants and those with neurological complications
- Speech and language therapist: expert knowledge of structure and function of upper gastro- intestinal tract and how to optimise feeding potential of vulnerable babies

#### GROWTH MONITORING

- All staff: Awareness of importance of making accurate and regular measurements and plotting them on appropriate charts to monitor growth
- Nursing staff: Weigh babies at intervals as indicated by clinical condition (ideally three times per week)
- Medical and Nursing staff: Measure head circumference and length at intervals as indicated by clinical conditions (ideally head circumference at least weekly and length at least fortnightly)
- Medical and Nursing staff: Plot growth measurements on appropriate chart weekly (provided competent to do so)

#### SPECIAL CASES

- Neonatal Nutrition Team: Will review high risk or complex patients on weekly nutrition ward round

#### 4. Related Trust Documents

Donor Breast Milk Guideline (to be found at:

<http://staffnet/TrustDocsMedia/DeptDivSpecific/DivC/WomenNewborn/NeonatalUnit/NeonatalGuidelines/DonorBreastMilkGuideline/DonorBreastMilkGuideline.doc>)

Breastfeeding care pathway (on Neonatal Unit Guidelines on Unit Desktop PCs)

Vitamins and supplements guideline (on Neonatal Unit Guidelines on Unit Desktop PCs)

Parenteral Nutrition Guidebook, 4<sup>th</sup> edition (Hard copies in nurseries on Neonatal Unit)

Princess Anne Breastfeeding Policy (to be found at

<http://staffnet/TrustDocsMedia/DeptDivSpecific/DivC/WomenNewborn/Obstetrics/ObstetricClinicalGuidelines/BreastfeedingTermInfantsGuideline/BreastfeedingTermInfantsGuideline.doc>)

Neonatal Unit Breastfeeding and Formula Feeding Guideline (currently being written)

Neonatal Surgical Clinical Aids (to be found at:

<http://staffnet/Departments/DivisionC/Womenandnewborn/NeonatalServices/NeonatalSurgery/NeonatalSurgeryclinicalaids/NeonatalSurgeryclinicalaids.aspx>)

Central Venous Access Guideline (currently being written)

Naso/Orogastric Tubes in Neonates - the safe placement of: Guidelines (to be found at:<http://staffnet/TrustDocsMedia/DeptDivSpecific/DivC/WomenNewborn/NeonatalUnit/NeonatalGuidelines/NasoOrogastricTubesinNeonates-thesafeplace/NasoOrogastricTubesinNeonates-thesafeplacementofGuidelines.DOC>)



## 5. Guideline Information

### 1. AIMS AND OBJECTIVES

- To optimise use of breast milk and breast-feeding
- To achieve recommended nutrient intakes
- To achieve postnatal growth and body composition approximating fetal growth.
- To reduce the risk of nutritional deficiency states such as late anaemia of prematurity or metabolic bone disease.
- To reduce the risk of feeding related morbidities such as NEC or cholestasis
- To optimise long term neurodevelopmental outcome.

### KEY PRINCIPLES

- All babies should be measured and have nutritional risk assessment on admission, and weekly during their stay
- Nutrition support should be started early: PN for high risk; enteral feeds for lower risk
- Mother's breast milk is the feed of first choice
- Feed tolerance should be assessed regularly and managed according to algorithms
- Protein intake should be documented and optimised in preterm infants
- High risk babies should be seen each week by the Nutrition Team
- Nutrition and feeding should be discussed in Discharge Planning and documented in the notes

### AUDIT POINTS

- Use of Nutrition Screening Tool, on all NNU admissions (100%)
- Use of growth charts on all NNU admissions (100%)
  - Weight and Head Circumference plot weekly; length plot 2-weekly
- Lactation advice and support by 6 hours for all mothers of VLBW infants
  - 100% - unless mother too ill
- Breastfeeding rates at discharge
- Protein and energy intakes as recommended by Tsang 2005
- Use of nutritional supplements according to Guidelines
- Documentation of Nutrition Plan at discharge (100%)

## 2. ASSESSMENT AND MONITORING

### (i) INITIAL ASSESSMENT

#### a. Growth Measurement

All infants should have weight, length and head circumference measured and plotted on the appropriate growth chart at admission. This information, together with other risk factors detailed below, will identify the degree of 'nutritional risk' – ie risk of becoming malnourished or developing nutrition and feeding related problems. Infants with multiple risk factors should be classified according to their highest individual risk factor. This will guide nutritional care and allow subsequent progress to be monitored.

#### b. Risk assessment – identify level of risk for nutrition and / or feeding-related problems

##### High risk

- Preterm <28 weeks
- ELBW < 1000g
- Severe IUGR (weight < 2<sup>nd</sup> centile with AREDF) <35 weeks
- Infant establishing feeds after episode of NEC or GI perforation
- Infants with severe congenital GI malformation: e.g. gastroschisis
- Severe Perinatal hypoxia / ischaemia

##### Moderate risk

- Preterm 28-31<sup>+6</sup> weeks, otherwise well
- VLBW 1000 – 1500g
- Moderate IUGR (weight < 9<sup>th</sup> centile with AREDF) <35 weeks
- Baby on inotropes
- Baby on indomethacin/ibuprofen (NB avoid concomitant treatment with steroids)
- Baby >1500g with illness or congenital anomaly which may compromise feeding
- Symptomatic polycythaemia, with PCV  $\geq$  70%

##### Low risk

- Preterm 32-36<sup>+6</sup> weeks, otherwise well
- AREDF / IUGR  $\geq$ 35 weeks
- Term Infants >37 weeks

## (ii) ON-GOING ASSESSMENT AND MONITORING

- a. GROWTH
  - i. Weight should be measured at least twice a week, and plotted on CLOSE MONITORING WHO growth chart weekly. More frequent weights required for some babies should be plotted on a daily weight chart
  - ii. Head circumference should be measured and plotted weekly
  - iii. Length should be measured and plotted within the first week, and every 2 weeks thereafter.
  - iv. If a baby is too sick to be weighed and measured so cannot be plotted, mark the bottom of the growth chart at date with a triangle ( $\Delta$ ) at the day's date.
  - v. Targets for weight – changes in weight in the early days of life usually reflect fluid balance: aim for weight loss of no more than 10% from birth weight. Once baby is stable and growing, aim for gain of 15-20 grams/kg/day
  - vi. Head circumference and length: normally expect increase of 0.75 cm/week
- b. BIOCHEMISTRY
  - i. **First week of PN:**
    - Full TPN Profile daily (FULL IP MG on eQuest, this includes U&E's, Calcium, magnesium phosphate and LFTs)
    - FBC twice weekly
  - ii. **Second and subsequent week of PN:**
    - Full TPN Profile and FBC twice weekly if stable (daily if still unstable)
  - iii. **Triglycerides** should be measured weekly (ideally Mondays) when on IV lipid
  - iv. **If on PN for longer than 1 month, then Trace elements (Zn, Cu, Se, Mn – use special blood bottle in Dr's Office) and Vitamins (A, D and E) should be measured monthly. Consider measuring Iron status and clotting**
  - v. **When on enteral feeds:**
    - Infants in the High and Medium risk categories need weekly FBC, U&Es, LFTs and Bone profiles once they are off PN and fully enterally fed. This can be extended to once fortnightly when babies are moved into Special Care.
- c. SCREENING
  - i. A Neonatal Nutrition Screening form should be completed on admission and on Sunday/Monday when the baby has been weighed and measured each week on all babies to identify those requiring nutrition team review
- d. NUTRITION TEAM REVIEW
  - i. Nutrition ward rounds take place on Tuesday mornings from 0900-1100. Nutrition team will see all 'high-risk' babies, and any others identified by nutritional screening on Sunday/Mondays.

### 3. NUTRIENT REQUIREMENTS

Nutrient requirement for Term and Preterm infants in the first weeks of life are summarised below. The figures shown below are based on the parenteral requirements for the first week, and the enteral requirements for the subsequent weeks (for a full list of parenteral and enteral requirements see Appendix 1).

Term infants – based on intake in 150 ml/kg breast milk; preterm infants based on recommendations in Tsang 2005 unless otherwise stated.

There are no specific guidelines for those babies born over 1.5kg and under term weight (2.5 kg) but it can be anticipated that their nutritional needs will be between those of preterm infants and term infants. Nutritional support should therefore aim to deliver nutrient intakes in this area.

It should be noted that these are just recommendations, and some infants may require more of certain nutrients such as Sodium and Potassium as dictated by the results of blood tests.

| Nutrient<br>Unit/kg/day | Term<br>infant | Preterm<br>VLBW<br>1000-1500g<br>1 <sup>st</sup> week<br>(parenteral) | Preterm<br>VLBW<br>1000-1500g<br>After 1 <sup>st</sup><br>week<br>(enteral) | Preterm<br>ELBW<br>< 1000g<br>1 <sup>st</sup> week<br>(parenteral) | Preterm<br>ELBW<br>< 1000g<br>After 1 <sup>st</sup><br>week<br>(enteral) |
|-------------------------|----------------|-----------------------------------------------------------------------|-----------------------------------------------------------------------------|--------------------------------------------------------------------|--------------------------------------------------------------------------|
| Energy (kcal)           | 100            | 60-70                                                                 | 110-130                                                                     | 75-85                                                              | 130-150                                                                  |
| Protein (g)             | 1.5-2.1        | 3.5                                                                   | 3.4-4.2                                                                     | 3.5                                                                | 3.8-4.4                                                                  |
| Nitrogen (g)            | 0.24-0.34      | 0.56                                                                  | 0.54-0.61                                                                   | 0.56                                                               | 0.61-0.70                                                                |
| Sodium (mmol)           | 1.4            | 2.0-5.0                                                               | 3.0-7.0                                                                     | 2.0-5.0                                                            | 3.0-7.0                                                                  |
| Potassium<br>(mmol)     | 2.0            | 0-2.0                                                                 | 2.0-3.0                                                                     | 0-2.0                                                              | 2.0-3.0                                                                  |
| Calcium<br>(mmol)       | 1.25           | 1.5                                                                   | 2.5-5.5                                                                     | 1.5                                                                | 2.5-5.5                                                                  |
| Phosphate<br>(mmol)     | 1.3            | 1.5-1.9                                                               | 1.9-4.5                                                                     | 1.5-1.9                                                            | 1.9-4.5                                                                  |
| Vitamin D IU*           | 340            | 40-160                                                                | 800-1000                                                                    | 40-160                                                             | 800-1000                                                                 |
| Vitamin A IU**          | 1150           | 700-1500                                                              | 700-1500                                                                    | 700-1500                                                           | 700-1500                                                                 |
| Iron (umol)             | 17.9           | 0                                                                     | 35.8-71.6                                                                   | 0                                                                  | 35.8-71.6                                                                |

\*Vitamin D = dose quoted is total daily dose; ESPGHAN 2010 recommendation for enteral dose for preterm infants; term infants DH Dietary Reference Values 1991 (340 IU = 8.5 mcg Vit D)

\*\*Vitamin A = dose quoted is total daily dose; term infants DH Dietary Reference Values 1991 (1150 IU = 350 mcg of Vitamin A retinol equivalent)

#### 4. STANDARD NUTRITION SUPPORT –

##### (a) OVERVIEW - GETTING STARTED - EARLY TPN AND TROPHIC MILK FEEDS

##### **HIGH RISK / MEDIUM RISK (see flow charts for high [A] and medium risk preterm infants [B])**

- Aim to introduce milk feeds gradually while maintaining calorie and nutrient intake with PN
- Before starting or increasing milk ensure baby is clinically stable and abdomen soft
- Ensure mother has lactation support to start expressing (see breastfeeding care pathway)

##### **High risk preterm (<28 weeks; <1000g; severe IUGR/AREDFV <35 weeks)**

|         |                                                                                                                                                                                                                                                                                              |
|---------|----------------------------------------------------------------------------------------------------------------------------------------------------------------------------------------------------------------------------------------------------------------------------------------------|
| Day 1   | Start Stock Preterm PN at 60-90 ml/kg/day via UVC or long line, as soon as possible unless baby very unstable. Give fresh colostrum as mouth care or as trophic feeds                                                                                                                        |
| Day 2-3 | Start trophic feeds: MBM 1 ml/kg 2-4 hourly (if no MBM can use DBM- see choice of milk chart);                                                                                                                                                                                               |
| Day 3-7 | Change to Stock Preterm + Sodium PN when 6% weight loss from birthweight [7], additional sodium required, or by day 5, whichever soonest. Increase milk by 10-20 ml/kg/day as tolerated (see table); Aim to decrease PN flow rates with feeds only once baby on total fluids of 180ml/kg/day |

##### **Moderate risk preterm (28-31<sup>+6</sup> weeks; 1000g <1500g; mod IUGR/AREDFV < 35 weeks)**

|         |                                                                                                                                                                                                                                                                     |
|---------|---------------------------------------------------------------------------------------------------------------------------------------------------------------------------------------------------------------------------------------------------------------------|
| Day 1   | Start Stock preterm PN at 60-90 ml/kg/day via UVC or long line as soon as possible; if no central access consider peripheral PN                                                                                                                                     |
| Day 1-2 | Start colostrum/milk 1 ml/kg 2 hourly ('see choice of milk' chart)                                                                                                                                                                                                  |
| Day 3-7 | Change to Stock Preterm + Sodium PN when 6% weight loss, or by day 5, whichever is sooner. Aim to decrease PN flow rates with feeds only once baby on total fluids of 180ml/kg/day. Increase milk by 20-30 ml/kg/day according to clinical condition and tolerance; |

##### **High / moderate risk term or near-term infants**

All high/moderate risk babies should have a plan for nutrition support on admission and periods greater than 48 hours without protein and micronutrients should be unusual

##### **Low risk**

|         |                                                                             |
|---------|-----------------------------------------------------------------------------|
| Day 1   | Commence milk feeds 30-60 ml/kg/day, supplemented by IV fluids if necessary |
| Day 2-7 | Increase milk feeds by 30 ml/kg/day as tolerated                            |

##### **NOTES**

- If severely unwell or acidotic, PN may need to be delayed (though contains acetate)
- Babies with HIE undergoing therapeutic hypothermia, may tolerate trophic milk feeds
- For babies with surgical problems, see 'surgical guidelines' – section 6

Version: 1.0

Issued: December 2011

Disclaimer: It is your responsibility to check against StaffNet that this printout is the most recent issue of this document

Page 12 of 37

#### 4. (b) PARENTERAL NUTRITION

##### i) Indications for PN

- High or Moderate risk infants as described above
- Infants who are NBM and unlikely to achieve adequate milk intake in the next 5 days
- Infants who are not tolerating feeds such that they cannot take full feed volumes for 5 consecutive days

##### ii) Starting PN

- In high and moderate risk infants PN should be started as soon as possible as delay can result in significant and cumulative nutrient deficits.
- Birth weight  $\leq 1500\text{g}$  – start as soon as possible after birth
  - Ideally within 6 hours
- Birth weight  $>1500\text{g}$  – if enteral feeding contra-indicated, start PN by
  - 48 hours in 1500-2500g
  - 72 hours in 2500-3500g if NBM
- Central line insertion (UVC or peripherally inserted central venous line) should be a priority for high and moderate risk infants
- If feeds are stopped on high or medium risk infant for any reason, re-stat PN

##### iii) Stock PN

- Infants should be started on Stock PN in the first instance as detailed below:
  - Preterm PN – For preterm infants ( $<37/40$  gestation) where additional sodium is not indicated (ie until 6% weight loss, or day 5 of life)
  - Preterm + Sodium PN- For preterm infants ( $<37/40$  gestation) requiring maintenance sodium. **This should be the PN of choice for the majority of preterm infants after the first few days following birth**, as it contains more protein.
  - Term PN – for Term infants ( $\geq 37$  weeks gestation) at any point after birth.
- Stock PN comprises an aqueous solution (glucose, amino acids, electrolytes and trace elements) and a lipid solution (**which contains both fat- and water-soluble vitamins**). For adequate nutrition it is **important that the lipid is always given with the aqueous solution** at all times (except when well advanced on enteral feeds - see below).

##### iv) Pharmacy made ('bespoke') PN

- Neither PN alone nor unfortified full breast milk feeds fully meet the nutritional needs of preterm infants, so the period when a preterm infant transitions from PN to milk feeds is when they are at highest risk of poor nutrient intakes.
- Stock PN is designed to give the maximum possible nutrition at 130ml/kg/day. **Therefore, pharmacy can make bespoke PN, which provides more nutrition in a smaller volume, should be used whenever a preterm infant is receiving less than 130ml/kg/day of Stock PN.** This will occur whenever a preterm infant is increasing on enteral feeds, is fluid restricted, or receiving other infusions
- Bespoke PN may also be appropriate where infants have electrolyte requirements than cannot be met with Stock PN

**v) Reducing PN as enteral feeds increase**

- **Only once the infant is receiving 180ml/kg/day total fluids should the PN solution be decreased as enteral feeds increase** (unless there is a clinical decision to restrict fluids).
- Once the infant is on 90ml/kg/day enteral feeds, the rate of lipid infusion should be halved, and then stopped when the infant reaches 135ml/kg/day enteral feeds (beware with pharmacy made TPN as this reduction in lipid may have already been done as part of the prescription). Any shortfall in total fluid volume due to the reduction in lipid should be made up by increasing the aqueous PN solution, to allow maximum protein to be delivered to the infant (though do not go above the maximum prescribed rate). This is important when infants are on Stock PN, but for those on bespoke PN, the reduction in lipid may have already been done/accounted for by the pharmacists when the PN was prescribed so may not be necessary (check with the pharmacists first). **Remember that once the lipid is stopped, vitamin intake will be inadequate until Abidec is started.**

**vi) Peripheral PN**

- PN should ideally be given via a central line. However, there are occasions in high nutritional risk infants with difficult access where the benefits of giving PN peripherally may outweigh the risks. Such decisions should be made by the Consultant responsible for the patient.

**vii) Cautions on PN**

SEPSIS - may affect lipid metabolism; measure triglycerides and if  $>2.8\text{mmol/L}$  consider reducing or stopping IV lipid for 12-24 hours in severely septicaemic baby (remember to restart/increase lipid when sepsis has resolved)

THROMBOCYTOPENIA – high concentration of polyunsaturated fats may impair platelet adhesion: reduce lipid to 1-2 g/kg/day if platelets  $<50$ .

CHOLESTATIC JAUNDICE – total and prolonged PN increases the risk, so try to give some enteral feed if at all possible; other risk factors include IUGR, sepsis and short bowel syndrome. Lipid solutions containing fish oil (eg SMOF) can reduce or reverse cholestasis, and should be considered in high risk babies if on PN for 4 weeks or more. Alternate day lipid may also be indicated in this situation, or if altered liver function - discuss with the pharmacists.

#### 4 (c) ENTERAL NUTRITION

- i. **Starting feeds** – see section 4(a) for guidance. Before starting feeds ensure baby is clinically stable and abdomen soft. In high-risk infants trophic feeding should be started within the first 72 hours if at all possible to minimise intestinal mucosal atrophy, and continued until ready to progress.
- ii. **Choice of milk** – Mother's breast milk is almost always the feed of first choice, unless contraindicated by maternal illness or drugs. If no maternal milk available pasteurised donor breast may be used for high risk babies (parental consent required) in accordance with the DBM guideline. Preterm formula (LBW/Aptamil Preterm) is indicated for infants with gestation <34 weeks, or birth weight <1800 grams; Post discharge formula (Nutriprem 2) is indicated for preterm infants either as sole diet or in addition to breast-feeding from around 36 weeks (or at discharge) up to 6 months corrected. (see Flow Chart D)
- iii. **Advancing feeds** – see section 4 (a) for guidance on volumes
- Before starting or increasing milk ensure baby is clinically stable and abdomen soft. Small gastric residuals can be tolerated if baby well. Passage of meconium and then changing stools is an important indication of gut motility. Glycerine suppositories may be useful if no stool passed for 48 hours.
  - Feeds can be increased by 10-20ml/kg/day in high-risk, 20-30ml/kg/day in moderate risk and 30 ml/kg/day in low risk babies
  - Test for residuals 4-6 hourly
  - If baby vomits, or has residuals >25% of the previous 4 hours total feed volume and persisting or increasing examine and assess baby and refer to flow chart C
- iv. **Nutritional supplements**
- BREAST MILK FORTIFIER (BMF, see high risk and moderate risk flow charts A and B) - 'multi-component' fortifier provides additional calories (carbohydrate), protein (cows' milk based), minerals and vitamins in a powder which is added to mother's breast milk. It should be more or less routine for babies with birth weight <1500g to receive fortifier once they have tolerated 150 mls/kg/day of MBM for 24 hours, unless significant gut or renal compromise. Blood Urea and albumin levels provide useful markers of protein status. In general, give ½ strength for 24-48 hours and then increase to full strength (2.2g sachet to 50 mls MBM), though it may be preferable to increase the fortifier by ¼s in high risk infants. For some extremely high risk infants it may be prudent to start fortifier when on 120-135 mls/kg/day of MBM and increase strength more gradually as PN is gradually reduced, in order to ensure the baby will be able to achieve enteral nutrient targets before stopping PN.



- Vitamins and Iron – breast milk provides insufficient vitamins (particularly vitamin A and D) for preterm infants, and virtually no iron. Abidec (multivitamins) and Sytron (iron) should be started according to NNU guideline
- Electrolytes and minerals
  - Small doses should be given as boluses, as scheduled on drug chart
  - Sodium : aim to maintain serum sodium 135-145 mmol/L  
If on > 4 mmol/kg/day, add to daily feeds in milk kitchen; if < 4 mmol/kg/day, give as divided bolus drugs (ideally as a four times daily regimen)
  - Phosphate: content of BM is low. Aim to maintain serum inorganic phosphate levels greater than 1.8mmol/L. Usually given as Potassium Acid Phosphate 0.5-2mmol/kg/day. If required as outpatient, may be preferable to use BMF

#### v. Nutrition at discharge

It is important to start discharge-planning well in advance. Breast-feeding at discharge is the preferred goal for all infants. However for preterm infants nutritional supplementation will be required. For those not being breast fed advice has to be given on choice of formula, so for all infants a pre-discharge nutrition assessment should be made and plan documented.

#### MUM PLANNING TO BREAST FEED

- Ensure lactation support is on-going re feeding technique
- Discuss with Out-reach sister re support at home
- **All preterm infants (<35 weeks) should have Abidec (1 ml) and Sytron (1 ml) daily**
- Assess growth
  - If growth has been good and weight, length and HC are no more than 0.67 SD (ie one centile line) below birth levels, then assess weight gain after 48 hours. If satisfactory can go home breast-feeding
  - If baby has had significant post-natal growth restriction and is >1.33 SD below birth (2 centile lines), discuss with Nutrition team / Dietician and consider discharge on BMF, with Outreach Support
  - For those with modest growth restriction, i.e. between one and two centile line drop, review overall pattern of growth and consider requesting nutrition review and Outreach support.

#### MUM PLANNING TO FORMULA FEED

- Babies <34 weeks gestation, with birthweight <2kg can be considered for discharge on Post-Discharge Formula (PDF) – ‘Nutriprem 2’. This should be continued until 3 to 6 months corrected age.
- ELBW and VLBW babies who have been on LBW formula should be changed to PDF at approximately 36 weeks corrected age, or when beginning to take most feeds by bottle. For those who have had severe extra-uterine growth restriction, continuing with LBW formula to 40 weeks corrected age may be appropriate.
- Babies discharged on PDF should have Abidec 0.6 ml, but not Sytron.
- If changing to term formula, prescribe Abidec 1 ml (continue until at least one year post term) and Sytron 1ml (continue until 6 month post term)

SOLIDS – can be introduced at 5-8 months REAL AGE (ie not corrected for prematurity)

**5. MANAGEMENT OF COMMON GUT AND FEEDING PROBLEMS** – see flow chart C

- 1  
2  
3  
4  
5  
6  
7  
8  
9  
10  
11  
12  
13  
14  
15  
16  
17  
18  
19  
20  
21  
22  
23  
24  
25  
26  
27  
28  
29  
30  
31  
32  
33  
34  
35  
36  
37  
38  
39  
40  
41  
42  
43  
44  
45  
46  
47  
48  
49  
50  
51  
52  
53  
54  
55  
56  
57  
58  
59  
60
- a. **Gastric aspirates / residuals** – preterm infants have immature gut motility, and aspirates/residuals and small vomits are not uncommon. Dark green bile stained aspirates, particularly in association with abdominal distension and / or tenderness are a cause for concern. However small milky / yellow aspirates up to 2-3 mls are frequently normal. They can be replaced, and feeds continued.
  - b. **Abdominal distension** – this is another common feature in preterm infants, due to poor gut motility. It tends to be more common in babies on nasal CPAP, with high volumes of air flowing into the upper airway and oesophagus. Tenderness, or systemic symptoms and signs such as apnoea, tachycardia or temperature instability should raise concern. If baby is otherwise well, a small glycerine suppository may help to stimulate peristalsis, and enable feeds to be continued.
  - c. **Suspected NEC** – classical features are blood and mucous in stools, bile stained aspirates and abdominal tenderness. Systemic signs such as tachycardia and hypotension occur in severe NEC. X-ray might show intramural gas ('pneumatosis coli'), dilated loops of bowel, free air, or a 'gas-less' bowel. In suspected NEC feeds should be stopped, and urgent attention paid to supporting ventilation, circulation and fluid balance.
  - d. **Suspected GOR** – mild milk reflux is common in newborn babies, including those born preterm and is usually self-limiting. It is rarely the cause of significant cardio-respiratory disturbance. However, apnoea and bradycardia are common in preterm babies and may occur in association with feeds. Try to avoid using gaviscon in babies who are having fortified MBM as the milk becomes excessively thick.
  - e. **Suspected Food Protein Intolerance** – food protein (e.g. cow's milk protein) intolerance can occur in young infants either breast fed or formula fed. Symptoms may include severe regurgitation, vomiting, constipation, peri-anal rash, blood in stools and iron deficiency anaemia. Non-intestinal features may include skin rash – atopic eczema, and colic. If this is thought to be the cause of symptoms, it is recommended that cow's milk protein be excluded from diet. If breast feeding, mother should exclude both cows' milk and egg products from her diet for two weeks, while continuing to breast feed. Formula fed infants should be tried on amino acid formula. If improvement is seen, a staged reintroduction should be carried out. If no improvement is seen on definite exclusion diet, food protein intolerance is unlikely. If exclusion diet is difficult to maintain, a trial of amino-acid formula may be breast fed infants. See review by Vandenplas et al.[8]

## 6. MANAGEMENT OF BABIES WITH SURGICAL BOWEL CONDITIONS WHICH MAY COMPROMISE NUTRITION

Information has been extracted from the NEONATAL SURGERY CLINICAL AIDS on SUHTranet:

(<http://staffnet/Departments/DivisionC/Womenandnewborn/Neonatalservices/Neonatalurgery/Neonatalurgeryclinicalaids/Anorectalmalformations.aspx>)

This website should be checked to ensure that the most up to date version of the guidance is used.

### GASTROSCHISIS

All babies with gastroschisis will require TPN.

For those treated with a Medicina Silo insertion at the cot-side a percutaneous long line should be sited on the Neonatal Unit but line insertion should ideally be delayed until after gut manipulation has ceased, i.e. once the silo has been removed and the defect closed, to reduce the chance of line colonisation. The median time to closure is 4 days. If it is felt that TPN should be commenced before this time then this can be given via peripheral cannula. In babies in whom it is thought there may be a delay in defect closure it may be better to proceed with line insertion prior to closure. As some gastroschisis babies may go on to have intestinal failure and require long term central venous access, central lines should only be inserted by staff with considerable experience of line insertion so as to avoid loss of suitable veins.

If the baby is taken to theatre for primary closure or surgical silo creation a percutaneous long line can be inserted in theatre at the time if someone with the appropriate expertise is available.

Duration of TPN may vary from 10 days to 6 weeks with a mean of 3 weeks. In rare cases gut function may be impaired for many months.

### DUODENAL ATRESIA

A trans-anastamotic tube (TAT) can be placed during surgery, which allows feeding into the jejunum. A naso/orogastric tube will also be required for gastric decompression. Usually a 6Fr enteral feeding tube is placed nasojejurally and an 8Fr nasogastric tube placed down the other nostril. In preterm babies this may produce problems due to obstruction to both nostrils. In this situation it may be better to pass an orogastric 8Fr tube and leave one nostril patent.

Poor duodenal contractility may delay normal oral feeding for as long as 3 weeks. This may be overcome by transanastamotic feeding although there is evidence that this may delay eventual oral feeding. It is NOT usually necessary to place a long line or commence TPN because of the use of TAT feeding. Duration of admission is about 7 - 10 days but may be longer if motility is very delayed.

### EXOMPHALOS

Nutritional support: Most babies who have undergone primary closure will tolerate enteral feeding soon and not need TPN. Most babies with a silo will require a long line and TPN

## MECONIUM ILEUS

Feeding may start when gut recovery from surgery allows. Usually start on MBM or standard formula feed grading up slowly. Feed may need to change to hydrolysed formula if weight gain inadequate on breast milk or standard formula. Occasionally TPN is needed.

80-90% of babies with MI are deficient in pancreatic enzymes, and supplementation with 'Creon®' may be required. Further details are provided in Surgical Clinical Aids and treatment will usually be guided by advice from the CF team

## OESOPHAGEAL ATRESIA and TRACHEO-OESOPHAGEAL FISTULA

A trans-anastomotic tube (TAT) nasogastric tube will be placed at time of surgery and feeding usually commences via the TAT at 48hrs post-op. If the TAT falls out do not re-pass as this may perforate the anastomosis. Consult the surgical team immediately.

Oral feeding normally starts between 3 and 5 days post-op at the discretion of the surgical team.

Gastro-oesophageal reflux prophylaxis: some surgeons use ranitidine post-op for 3 - 6 months. Others do not.

7. FLOW CHARTS

a. Starting and Increasing Feeds- HIGH RISK INFANTS

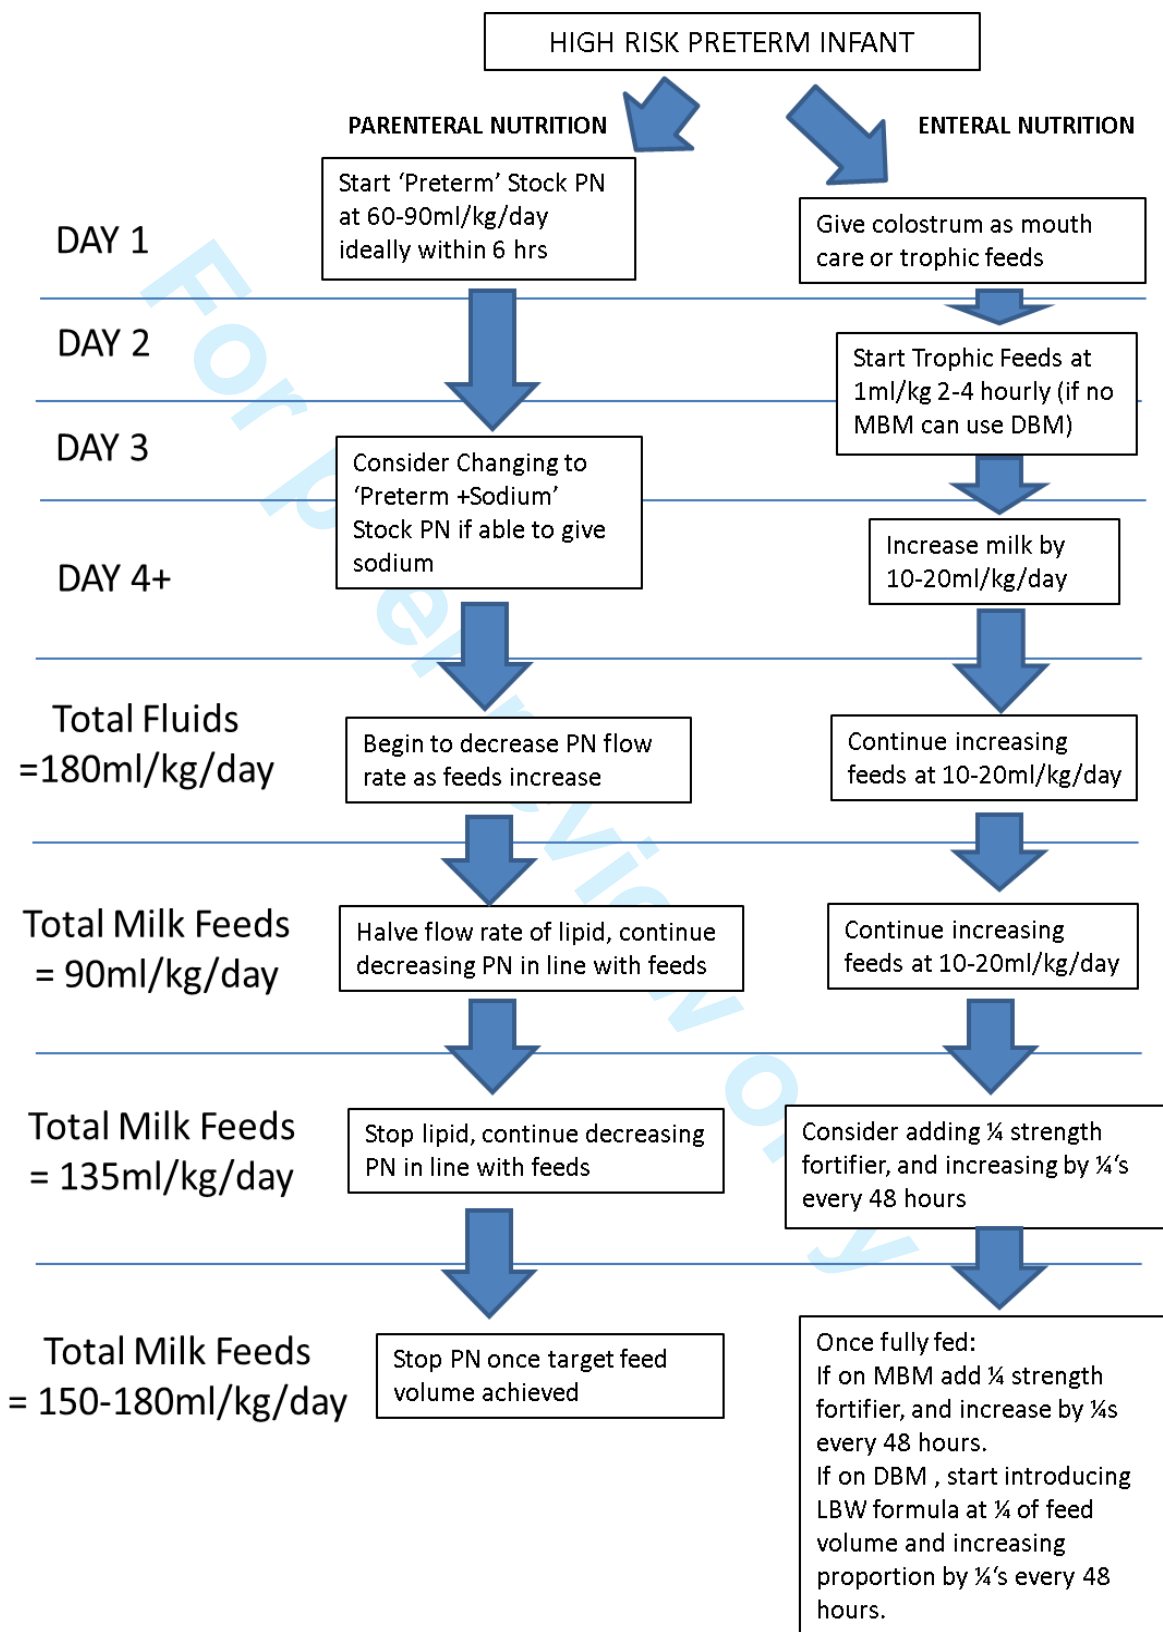

b. Starting and Increasing Feeds- MODERATE RISK INFANTS

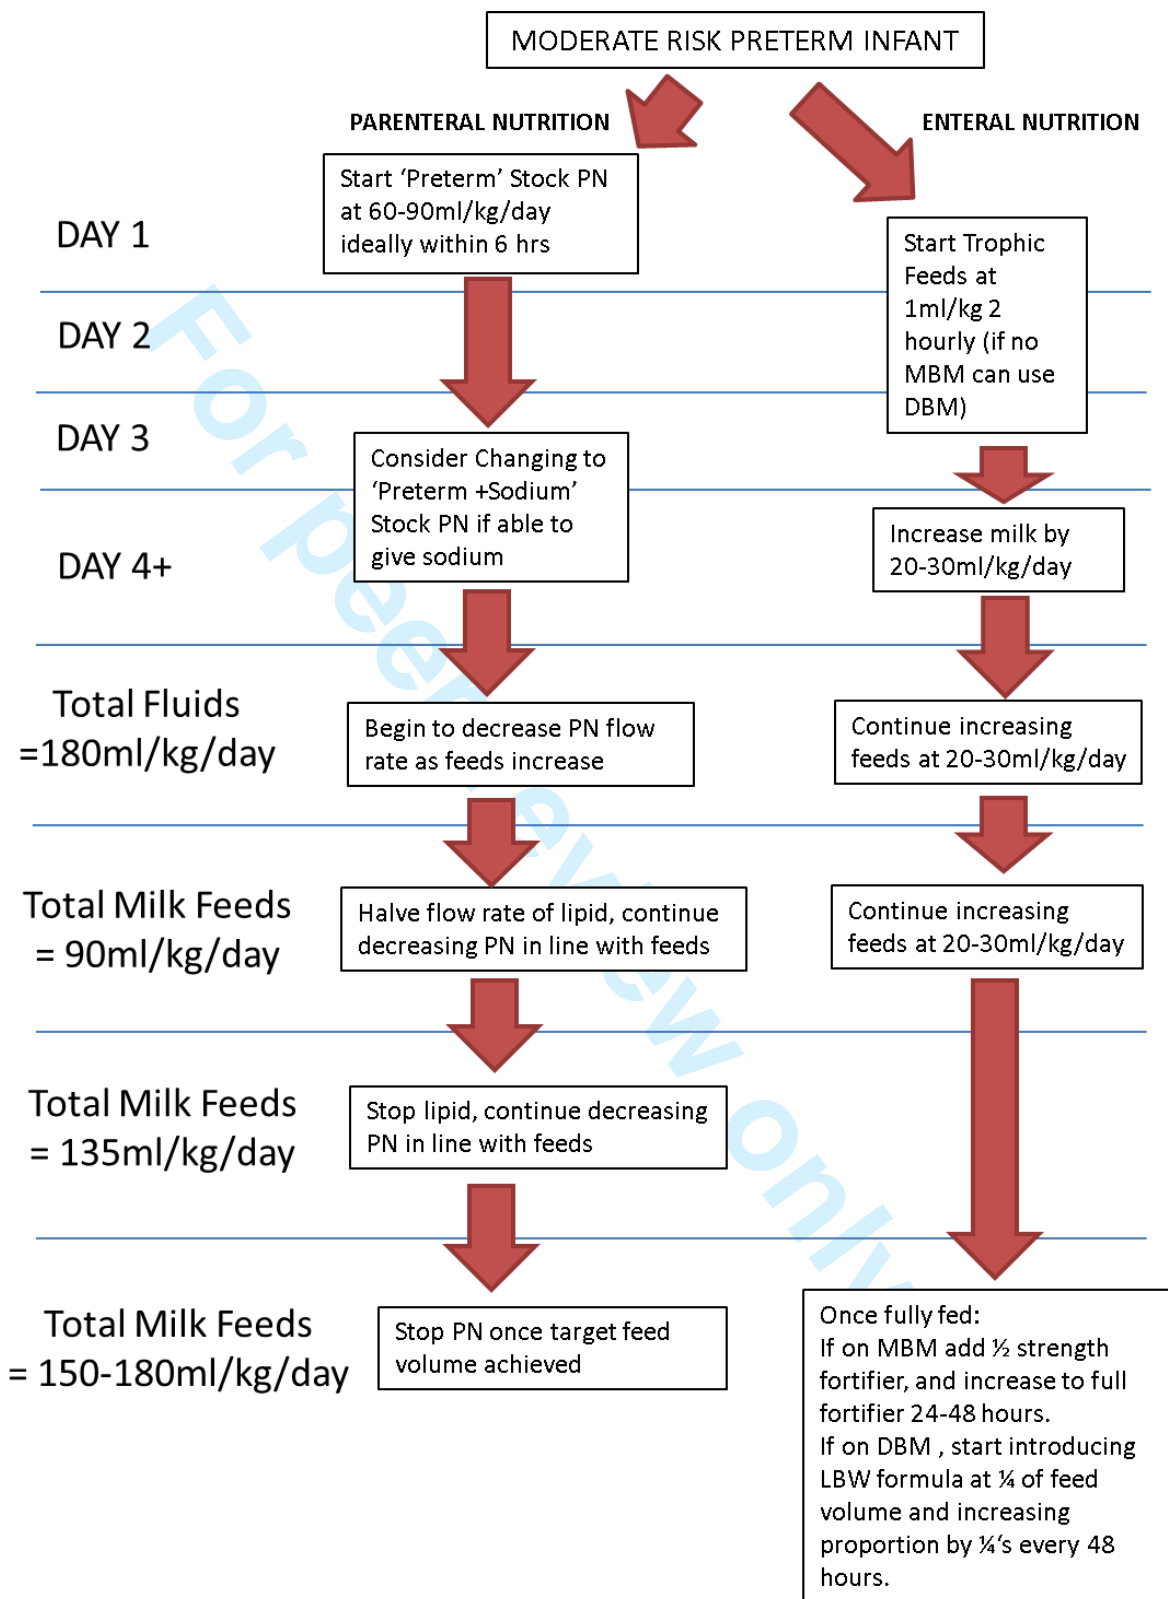

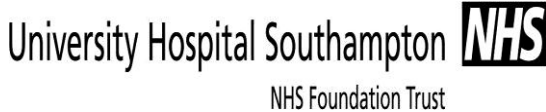

b. Management of common feed-related problems

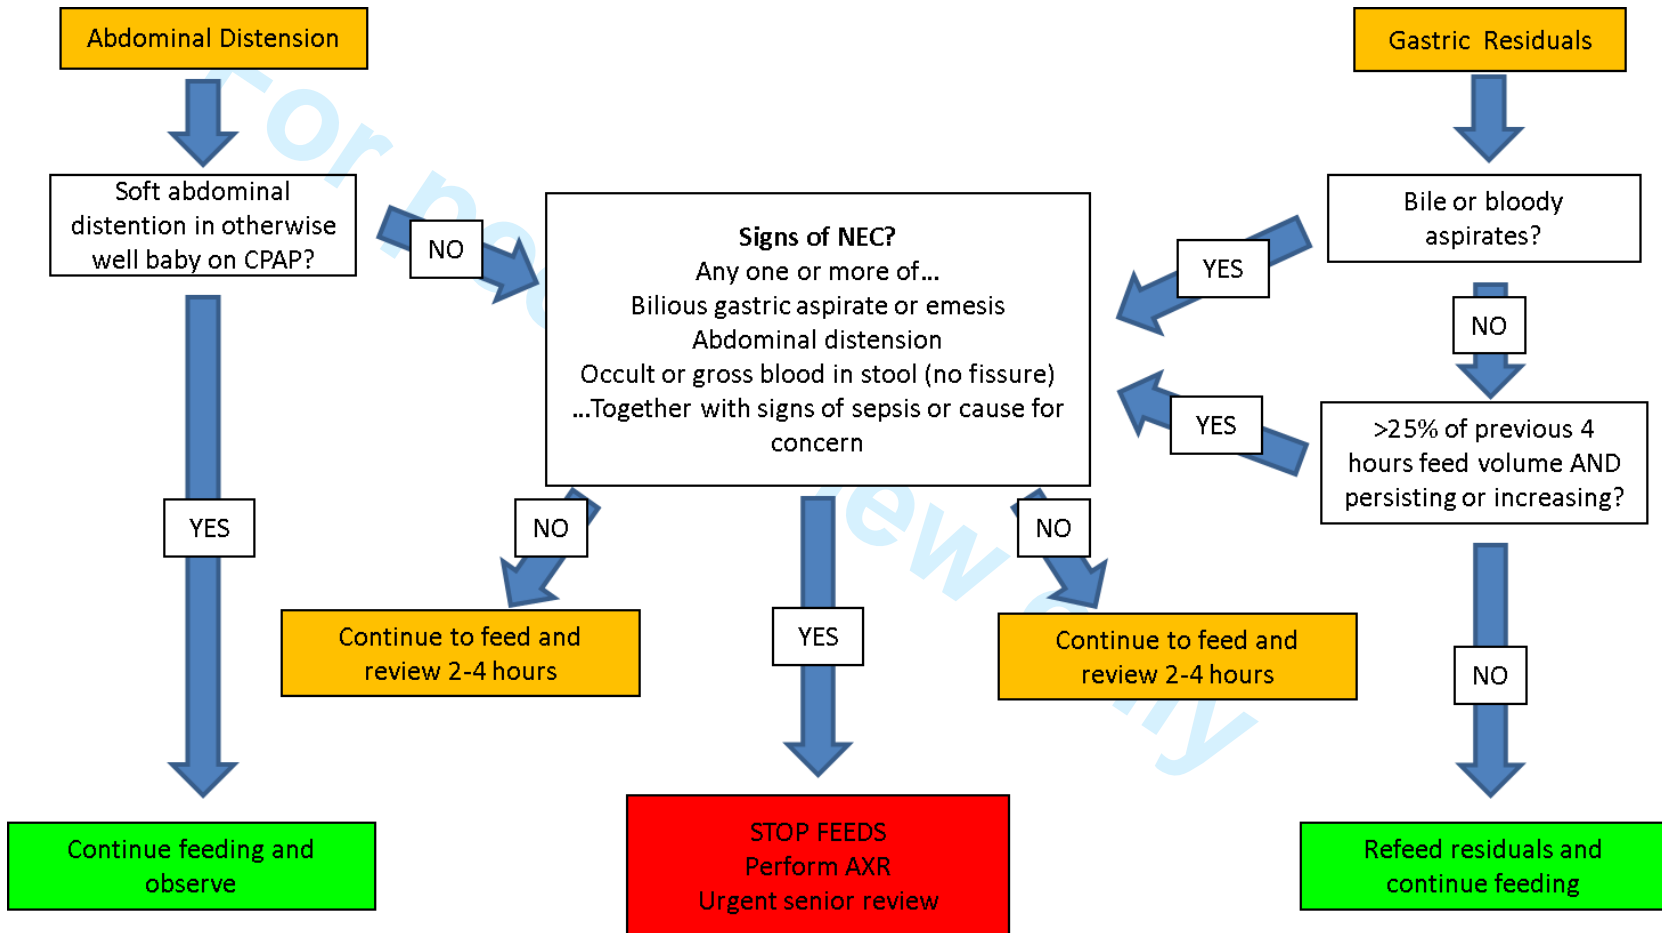

1  
2  
3  
4  
5  
6  
7  
8  
9  
10  
11  
12  
13  
14  
15  
16  
17  
18  
19  
20  
21  
22  
23  
24  
25  
26  
27  
28  
29  
30  
31  
32  
33  
34  
35  
36  
37  
38  
39  
40  
41  
42  
43  
44  
45  
46  
47

**c. Choice of Milk**

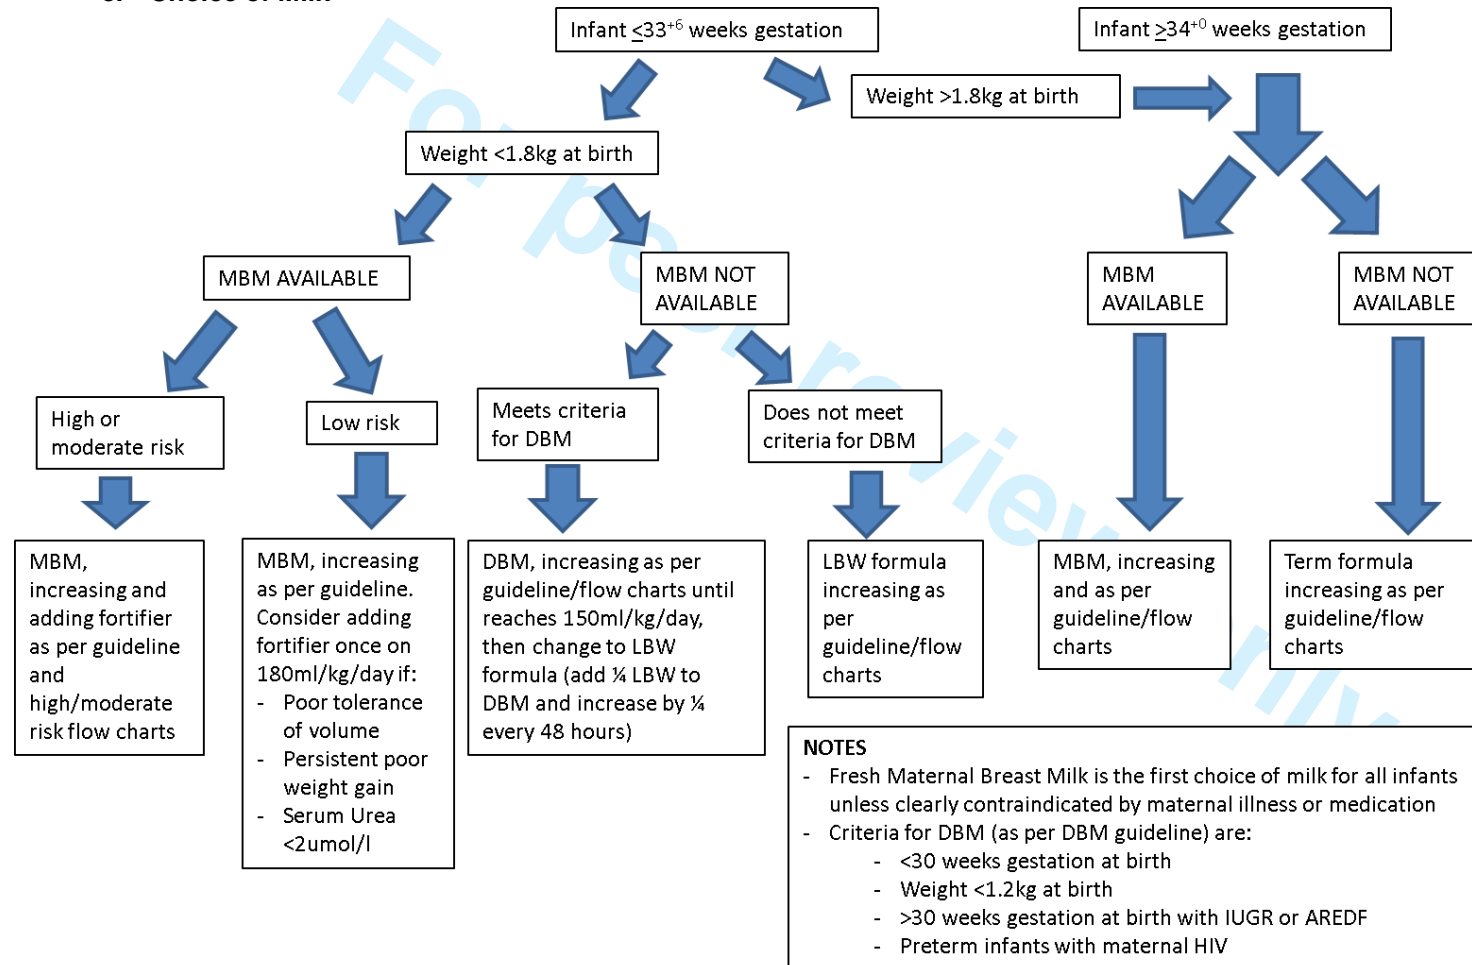



## 8. TABLES

### a. Starting and Increasing Feeds

#### i. High Risk Infants (based on increases of 10-20ml/kg/day)

| Weight (kg)   | Start at (hourly) | Start at (2 hourly) | Increase hourly feed volume by* | Increase 2hourly feed volume by |
|---------------|-------------------|---------------------|---------------------------------|---------------------------------|
| less than 0.6 | N/A               | 0.5                 | 0.25ml every 24 hours           | 0.5ml every 24 hours            |
| 0.6-0.9       | 0.5               | 1                   | 0.5ml every 24 hours            | 1ml every 24 hours              |
| 0.9-1.2       | 0.75              | 1.5                 | 0.5ml every 12 hours            | 1ml every 12 hours              |
| 1.2-1.5       | 1                 | 2                   | 0.5ml every 8 hours             | 1ml every 8 hours               |
| 1.5-1.8       | 1.25              | 2.5                 | 0.5ml every 6 hours             | 1ml every 6 hours               |
| 1.8-2         | 1.5               | 3                   | 1ml every 12 hours              | 2ml every 12 hours              |

#### ii. Moderate Risk Infants (based on increases on 20-30ml/kg/day)

| Weight (kg)   | Start at (hourly) | Start at (2 hourly) | Increase hourly feed volume by:* | Increase 2hourl feed volume by: |
|---------------|-------------------|---------------------|----------------------------------|---------------------------------|
| 1.0-1.2       | 1                 | 2                   | 0.5ml every 6 hours              | 1ml every 6 hours               |
| 1.2-1.6       | 1.5               | 3                   | 1ml every 12 hours               | 2ml every 12 hours              |
| 1.6-2.0       | 2                 | 4                   | 1ml every 8 hours                | 2ml every 8 hours               |
| 2-2.4         | 2.5               | 5                   | 1ml every 6 hours                | 2ml every 6 hours               |
| 2.4 and above | 3                 | 6                   | 1.5ml every 8 hours              | 3ml every 8 hours               |

\*Note that this refers to the actual feed **volume** based on 1 hourly feeds. Therefore if baby is 2 hourly fed then multiply the amount on this table by 2 to give the increase on the feed volume, if on 3 hourly feeds multiply by 3 and so on.

| Fluid Name<br>Nutrient                                                     | Preterm Stock PN | Preterm + Sodium Stock PN | Term Stock PN | Stock Lipid         | Dextrose 10%        | MBM/DBM | MBM with Full Fortifier* | Neocate LCP | Peptijunior | LBW Formula (Aptamil Preterm) | Post D/C Formula (Nutriprem 2) | Term formula | Infantrini |
|----------------------------------------------------------------------------|------------------|---------------------------|---------------|---------------------|---------------------|---------|--------------------------|-------------|-------------|-------------------------------|--------------------------------|--------------|------------|
| Energy (kcal)                                                              | 63.0             | 59.8                      | 70.2          | 166.7               | 40.0                | 69.0    | 85.0                     | 71.0        | 66.0        | 80.0                          | 75.0                           | 66.0         | 100.0      |
| Protein (g)                                                                | 2.3              | 2.8                       | 2.5           | 0                   | 0.0                 | 1.3     | 2.5                      | 2.0         | 1.8         | 2.6                           | 2.0                            | 1.3          | 2.6        |
| Carbohydrate (g)                                                           | 12.1             | 11.0                      | 13.5          | 0                   | 0.0                 | 7.2     | 10.0                     | 8.1         | 6.8         | 8.4                           | 7.4                            | 7.3          | 10.3       |
| Fat (g)                                                                    | 0                | 0                         | 0             | 16.7                | 0.0                 | 4.1     | 4.1                      | 3.5         | 3.5         | 3.9                           | 4.0                            | 3.5          | 5.4        |
| Sodium(mmol)                                                               | 0.0              | 4.3                       | 2.8           | 0.1                 | 0.0                 | 0.7     | 2.2                      | 0.8         | 0.9         | 3.0                           | 1.2                            | 0.7          | 1.1        |
| Potassium (mmol)                                                           | 2.4              | 1.7                       | 1.9           | 0                   | 0.0                 | 1.5     | 2.1                      | 1.6         | 1.7         | 2.1                           | 2.0                            | 1.6          | 2.4        |
| Calcium(mmol)                                                              | 0.8              | 1.0                       | 0.9           | 0                   | 0.0                 | 0.8     | 2.5                      | 1.2         | 1.2         | 2.3                           | 2.2                            | 1.2          | 2.0        |
| Phosphorous (mmol)                                                         | 1.0              | 2.2                       | 0.9           | 1.5                 | 0.0                 | 0.5     | 1.7                      | 1.1         | 0.9         | 2.0                           | 1.5                            | 0.9          | 1.3        |
| Iron (umol)                                                                | 0.0              | 0.0                       | 0.0           | 0.0                 | 0.0                 | 1.3     | 1.3                      | 18.8        | 13.8        | 25.1                          | 17.9                           | 9.5          | 21.5       |
| Vitamin A (IU)                                                             | 0.0              | 0.0                       | 0.0           | 3910.0              | 0.0                 | 213.0   | 985.6                    | 264.0       | 173.2       | 599.4                         | 269.7                          | 183.2        | 333.0      |
| Vitamin D (IU)                                                             | 0.0              | 0.0                       | 0.0           | 680.0               | 0.0                 | 0.0     | 200.0                    | 51.0        | 52.0        | 120.0                         | 68.0                           | 48.0         | 68.0       |
| Volume (ml/kg) required to reach recommended protein intake (ELBW infants) | 152              | 125                       | 140           | Contains no protein | Contains no protein | 292     | 152                      | 195         | 211         | 146                           | 190                            | 292          | 146        |

b. Nutrient Content of Commonly Used Products per 100ml

Typical Values are used and are correct at 18/10/2011

\*Based on Cow and Gate Nutriprem Breast Milk Fortifier

## 9. SUPPORTING INFORMATION

### GUIDELINES AND NUTRITIONAL CARE

There is good evidence from large epidemiological studies such as EPICure that preterm infants often fail to grow adequately, dropping to significantly lower centiles for weight and head circumference at discharge than those which they were born on[9, 10]. There is also evidence that growth failure is also associated with poorer neurodevelopmental outcomes[11]. One significant causative factor for this failure of growth is that these infants receive inadequate nutrition, and there is evidence that they fail to achieve appropriate targets for nutrient intake[12, 13]. Feeding practices across different neonatal units has been shown to be one of the factors responsible for the variability in lengths of stay and the level of postnatal growth restriction seen between different units offering the same level of care[14]. Although there is uncertainty around the definitive practice of nutritional support in preterm infants, there is evidence that standardisation of practice and the use of guidelines is beneficial. A systematic review and meta-analysis by Patole and De Clerk in 2005 showed that the use of standardised feeding regimens reduced rates of NEC, and in the context of the Vermont Oxford Network's 'Potentially Better Practices for Nutrition', the standardisation of practice was shown to reduce the time to start TPN and enteral feeds, improve use of breast milk, reduce lengths of stay and a lower rate of infants being discharged with weights below the 10<sup>th</sup> centile [4, 15]. Donovan et al studied aspects of nutrient intake and outcomes before and after the introduction of nutrition support guidelines in their NICU, showing significantly earlier initiation of both parenteral and enteral feeding, earlier achievement of full enteral feeding, and earlier regaining of birth-weight after introduction of guidelines[16].

### ASSESSMENT AND MONITORING

Some babies are at higher risk than others of nutritional problems – under-nutrition, feed – related complications or both. Regular assessment of nutritional status and monitoring of growth will help identify infants with greater nutritional needs or a higher risk of poor growth or problems. Preterm infants in particular are at risk and should have their weight, head circumference and length measured at a minimum of once a week [4, 6, 17].

The following are things to consider when assessing nutritional risk

- Term babies with appropriate birth weight have good nutrient stores, designed to support them through the first few days when breast milk volumes are low. They are low risk.

- Preterm babies have low nutrient stores and are born at time of rapid growth – the earlier they are then the bigger the problem and the greater their nutritional risk. This is compounded by immature gut and metabolic function. They are moderate to high risk (depending on gestation) and need early nutrition support.
- Growth restricted babies have less nutritional reserve; they may also have reduced perfusion to the gut before birth and an increased risk of NEC. These babies will therefore be at greater risk compared to babies of a similar gestation.
- Congenital abnormalities such as gastrointestinal abnormalities, facial anomalies and cardiac problems (including PDA and associated treatment) will all affect nutritional status and increase nutritional risk.
- Acquired disorders such as hypoxic-ischaemic injury, sepsis and NEC will impact on the nutrition infants receive and in turn put them at higher risk of poor nutrition.
- Combinations of the any of the above factors will result in a greater overall risk.

## NUTRITIONAL REQUIREMENTS

TERM INFANTS: breast milk provides appropriate nutrients for healthy term babies and breast-feeding should be supported and encouraged. Babies who are not being breast fed should be fed on a standard cows' milk based formula.

PRETERM INFANTS: evidence-based recommendations are available to guide nutrient intakes for preterm infants. The most comprehensive is Tsang 2005 [2], which gives guidelines for parenteral and enteral nutrition support, and specifies requirements for babies <1000g and 1000-1500g birth-weight, during both 'transition' phase (days 2-7 of life) and 'growth phase' (day 7 onwards). ESPHGAN 2010 [1] gives recommendations for enteral intake of fluid and nutrients, though is largely based on the Tsang recommendations. Growth is rapid in the third trimester of fetal life; infants born preterm thus have high requirements for nutrients, but immature physiological capacity to handle them. Breast milk is the optimal first choice for preterm infants' nutrition, however even at high volumes will not provide all adequate nutrients: supplementation with breast milk fortifier or preterm formula may be necessary. The tables in this guideline refer to the Tsang recommendations for energy and protein in VLBW infants and how they compare to typical feeds used in Southampton. Note that only LBW formula milk fed at 150ml/kg/day or fully fortified breast milk fed at 180ml/kg/day is able to achieve the recommended amounts). The full Tsang recommended nutrient intakes are given in Appendix 1. Essentially, the less mature, the lower the nutrient stores/reserves, the earlier nutrient provision is required

## STANDARD NUTRITIONAL SUPPORT OF PRETERM AND SICK INFANTS

## a. PARENTERAL NUTRITION

i. *Early use of PN*

The VON Potentially Better Practices for nutrition state that TPN should be commenced as early as possible, ideally within the first 24 hours of life [4]. This helps prevent the net nutrient loss and catabolism that occurs when an infant is born prematurely. Significant nutritional deficits have been shown to occur in the first few days (up to 2 weeks) after birth, so introduction of TPN early is a strategy to help prevent this [12]. There is also good evidence that it promotes anabolism, prevents the loss of protein mass, improves calorie intakes, can improve growth and is safe [3, 18-21].

ii. *Protein intake*

As described above, nutrient delivery in high risk groups is challenging, and the delivery of protein and energy early in life often fails to meet recommended targets. Whilst intravenous glucose given early on will meet energy needs in many cases, it contains no protein, which can only be administered using TPN or milk feeds. Therefore, in high risk infants who cannot be fully fed quickly, it is vital to give the largest amount of protein possible as TPN, as early as possible to try and prevent the accumulation of deficits. In view of this, Stock TPN in Southampton has recently been reformulated to provide higher levels of protein in a smaller volume. Using high protein TPN to deliver higher protein intakes in the first few days of life in preterm infants has recently been shown to have metabolic benefits in addition to the prevention of catabolism, including a reduction in hyperglycaemia and insulin use [22], and a significant reduction non-oliguric hyperkalaemia [23].

iii. *Peripheral vs central PN*

It is generally accepted that is preferable to given TPN via a percutaneous central venous catheter ('long line') than via a peripheral cannula, in view of the decreased risk of extravasation, the difficulty associated in obtaining repeated peripheral access in preterm infants, and the ability to give higher concentrations of glucose and potassium. Central lines on the other hand have the disadvantage of the risk of catheter related infections. A Cochrane review in 2007 concluded that central TPN was not associated with an increased risk of infection compared to peripheral TPN, and there was some evidence that central TPN resulted in a smaller number of catheters/cannulas per infant required to deliver the TPN, together with improved nutrient delivery [24]. However, it also concluded that there was no significant

1  
2  
3  
4  
5  
6  
7  
8  
9  
10  
11  
12  
13  
14  
15  
16  
17  
18  
19  
20  
21  
22  
23  
24  
25  
26  
27  
28  
29  
30  
31  
32  
33  
34  
35  
36  
37  
38  
39  
40  
41  
42  
43  
44  
45  
46  
47  
48  
49  
50  
51  
52  
53  
54  
55  
56  
57  
58  
59  
60

difference in adverse events (including extravasation) when comparing central to peripheral TPN. Therefore, whilst TPN should be given centrally wherever possible, peripheral TPN should be considered in some individual cases where there is significant nutritional risk and a delay or difficulty in obtaining central access [3].

*iv. Monitoring and Complications*

Careful monitoring of patients whilst on TPN is important to ensure appropriate and adequate nutrition, and to identify potential complications, including liver disease, metabolic bone disease and catheter-related infection. Current recommendations regarding monitoring have been laid out by ESPGHANs guidelines on paediatric parenteral nutrition[3]., and can be found in the NNU Parenteral Nutrition Guidebook

**b. ENTERAL FEEDING**

*i. Choice of milk*

There is good evidence that maternal breast milk (and to some extent donor breast milk) is protective against NEC, so breast milk should be the food of first choice [25-30]. Ideally this should be the mother's own fresh colostrum. All mothers of preterm infants should have lactation support, and help with expressing within 6 hours of birth (ideally within half an hour according to current WHO recommendations)[5]. If no maternal milk available by 48 hours and the baby is ready for milk, consent should be sought to use DBM. However, as DBM is a limited resource and there is evidence it contains fewer nutrients than mother's own breast milk, DBM should be reserved only for the purposes of establishing feeds in high risk infants, as laid out in the DBM guideline). Where breast milk cannot be used, preterm infants should receive a specialist high calorie and high protein formula ('LBW formula')[31-33]. Preterm formulas are designed to meet the basic nutritional requirements of most preterm infants when fed between 150 and 180ml/kg. Preterm formulas can be used as soon as commencement of enteral feeding is recommended. Term formulas should not be used as they fail to meet the nutritional needs of premature infants. There is no evidence to support the use of term elemental/semi elemental formulas in the early stages of feeding unless there is a compelling clinical reason to do so.

*ii. Starting Feeds*

The objective of early feeding is to stimulate gut maturation, motility and hormone release. As starvation leads to atrophy of the gut, withholding feeds

1  
2  
3  
4  
5  
6  
7  
8  
9  
10  
11  
12  
13  
14  
15  
16  
17  
18  
19  
20  
21  
22  
23  
24  
25  
26  
27  
28  
29  
30  
31  
32  
33  
34  
35  
36  
37  
38  
39  
40  
41  
42  
43  
44  
45  
46  
47  
48  
49  
50  
51  
52  
53  
54  
55  
56  
57  
58  
59  
60

may render subsequent feeding less safe and protract the time to reach full enteral feeding [34]. No work has yet addressed whether initial feeds should be exclusively breast milk (mother's own or donor) or whether initial feeds should be delayed if only formula is available. However most evidence suggests that any enteral feed given early may be better than gut starvation [35].

Trophic feeding is defined as small volumes of enteral feeds up to 24 mls/kg/day given to promote gut function. It has been shown to prevent changes of starvation in gut mucosa, but a systematic review of 9 trials of trophic feeds vs withholding feed, including 754 infants, did not find any difference in overall feed tolerance, weight gain or rates of NEC [36]. Due to concerns about NEC, commencement of enteral feeds is sometimes delayed in preterm infants. A Cochrane review of early vs delayed introduction of progressive enteral feeds did not show an increase in NEC with early feeds, but despite almost 1000 babies in 5 RCTs the conclusion was that data was insufficient [37]. The ADEPT trial randomised 404 preterm, growth-restricted babies to early feeds (start day 2) or late feeds (start day 6): the early group achieved full feeding earlier, required less PN and had less cholestasis, and no difference was seen in incidence of NEC [38]. There is thus no evidence to support delaying feeds; there is a lack of good evidence to guide feeding policy in babies on inotropes and ibuprofen.

*iii. Rate of advancing feeds*

In standard risk infants a rate of increase of 30ml/kg/day is reported safe, whereas data is more limited in the high risk infant. Evidence points towards several days of trophic feeds followed by a rate of increase of 10-20ml/kg/day. There should be a low threshold for withholding stepped increases secondary to tolerance concerns in the high risk infants. There is limited data on this. A Cochrane review [39] including 4 RCTs and 496 babies, considered increase of up to 24 mls/kg/day as slow, and 25 or greater mls/kg/day as rapid. More rapid increase was associated with earlier tolerance of full feeds and faster weight gain, and no difference in NEC, but numbers were too small to make definite conclusions. This topic is being considered by NIHR for a multi-centre UK trial at present.

*iv. Nutritional Supplements:*

As mentioned above, the nutritional needs of preterm infants are greater than infants born at term, and as such breast milk is adequate to meet those

needs [2]. In order to maintain the benefits of breast milk whilst optimising the nutritional status and growth of preterm infants' single multicomponent fortifiers (BMF) have been developed.

Concerns with the use of BMFs include tolerance and their effects to increasing osmolality and in turn the risk of NEC. Most studies have found no significant problems with the tolerance of fortified EBM [40], and a recent review of published evidence found no link between the relatively small increases in osmolality caused by the addition of fortifier to breast milk and NEC [41]. A Cochrane review concluded that the use of BMFs can lead to short term improvements in weight, length and head circumference and that while it is unlikely that further comparative studies with breast milk alone are to take place it recommends further research seeks to evaluate long term outcomes of BMF therapy and identify the optimum composition of BMF products [42].

Recommendations made in 2010 by ESPGHAN stated that the feed of choice for preterm infants (<1800g) was mother's own breast milk supplemented with BMF, or special preterm formula if breast milk not available [1].

v. *Nutrition at Discharge:*

Preterm infants are often discharged home with growth below that expected according to their birth centile. A review by ESPGHAN in 2006 looking at the evidence for feeding preterm infants after discharge recommended that infants discharged with an appropriate weight for their corrected gestational age should be discharged either breast feeding (where breast fed) or on regular formula (where formula fed). However, they also concluded that preterm infants discharged with a subnormal weight for their corrected gestation age should receive fortifier in addition to breast milk (where breast fed) or on special high energy/protein preterm infant formula (where formula fed) [43]. Recently, a Cochrane review looked at this in more detail, addressing the question of whether using fortifier in breast fed preterm infants after discharge improved growth. It concluded that using fortifier after discharge improved growth in infancy, though the evidence was limited [44].



## 6. References

1. Agostoni, C., et al., *Enteral nutrient supply for preterm infants: commentary from the European Society of Paediatric Gastroenterology, Hepatology and Nutrition Committee on Nutrition*. J Pediatr Gastroenterol Nutr, 2010. **50**(1): p. 85-91.
2. Tsang, R.C., *Nutrition of the preterm infant*. 2nd ed. ed. 2005, Cincinnati: Digital Educational Publishing. viii, 427 p.
3. Koletzko, B., et al., *1. Guidelines on Paediatric Parenteral Nutrition of the European Society of Paediatric Gastroenterology, Hepatology and Nutrition (ESPGHAN) and the European Society for Clinical Nutrition and Metabolism (ESPEN), Supported by the European Society of Paediatric Research (ESPR)*. J Pediatr Gastroenterol Nutr, 2005. **41 Suppl 2**: p. S1-87.
4. Kuzma-O'Reilly, B., et al., *Evaluation, development, and implementation of potentially better practices in neonatal intensive care nutrition*. Pediatrics, 2003. **111**(4 Pt 2): p. e461-70.
5. WHO, *Management and support of infant feeding in maternity facilities*, in *Infant and young child feeding : model chapter for textbooks for medical students and allied health professionals*. 2009, World Health Organisation. p. 29-36.
6. Edmond, K. and R. Bahl, *Optimal feeding of low-birth-weight infants*. 2006, World Health Organisation.
7. Hartnoll, G., P. Betremieux, and N. Modi, *Randomised controlled trial of postnatal sodium supplementation on body composition in 25 to 30 week gestational age infants*. Arch Dis Child Fetal Neonatal Ed, 2000. **82**(1): p. F24-8.
8. Vandenplas, Y., et al., *Guidelines for the diagnosis and management of cow's milk protein allergy in infants*. Arch Dis Child, 2007. **92**(10): p. 902-8.
9. Wood, N.S., et al., *The EPICure study: growth and associated problems in children born at 25 weeks of gestational age or less*. Archives of Disease in Childhood Fetal & Neonatal Edition, 2003. **88**(6): p. F492-500.
10. Ehrenkranz, R.A., et al., *Longitudinal growth of hospitalized very low birth weight infants*. Pediatrics, 1999. **104**(2 Pt 1): p. 280-9.
11. Ehrenkranz, R.A., et al., *Growth in the neonatal intensive care unit influences neurodevelopmental and growth outcomes of extremely low birth weight infants*. Pediatrics, 2006. **117**(4): p. 1253-61.
12. Embleton, N.E., N. Pang, and R.J. Cooke, *Postnatal malnutrition and growth retardation: an inevitable consequence of current recommendations in preterm infants?* Pediatrics, 2001. **107**(2): p. 270-3.
13. Martin, C.R., et al., *Nutritional practices and growth velocity in the first month of life in extremely premature infants*. Pediatrics, 2009. **124**(2): p. 649-57.
14. Cooke, R.J., S.B. Ainsworth, and A.C. Fenton, *Postnatal growth retardation: a universal problem in preterm infants*. Arch Dis Child Fetal Neonatal Ed, 2004. **89**(5): p. F428-30.
15. Patole, S.K. and N. de Klerk, *Impact of standardised feeding regimens on incidence of neonatal necrotising enterocolitis: a systematic review and meta-analysis of observational studies*. Arch Dis Child Fetal Neonatal Ed, 2005. **90**(2): p. F147-51.
16. Donovan, R., et al., *Outcomes of early nutrition support in extremely low-birth-weight infants*. Nutr Clin Pract, 2006. **21**(4): p. 395-400.
17. *Malnutrition- What nurses working with children and young people need to know and do. An RCN position statement*. 2006, Royal College of Nursing.
18. Anderson, T.L., et al., *A controlled trial of glucose versus glucose and amino acids in premature infants*. J Pediatr, 1979. **94**(6): p. 947-51.
19. Ibrahim, H.M., et al., *Aggressive early total parental nutrition in low-birth-weight infants*. J Perinatol, 2004. **24**(8): p. 482-6.
20. Wilson, D.C., et al., *Randomised controlled trial of an aggressive nutritional regimen in sick very low birthweight infants*. Arch Dis Child Fetal Neonatal Ed, 1997. **77**(1): p. F4-11.

21. Van Goudoever, J.B., et al., *Immediate commencement of amino acid supplementation in preterm infants: effect on serum amino acid concentrations and protein kinetics on the first day of life*. J Pediatr, 1995. **127**(3): p. 458-65.
22. Mahaveer, A., C. Grime, and C. Morgan, *Increasing early protein intake is associated with a reduction in insulin-treated hyperglycaemia in very preterm infants*. Arch Dis Child Fetal Neonatal Ed, 2011. **96**(Suppl 1): p. Fa21.
23. Iacobelli, S., et al., *Standardized parenteral nutrition in preterm infants: early impact on fluid and electrolyte balance*. Neonatology, 2010. **98**(1): p. 84-90.
24. Ainsworth, S.B., L. Clerihew, and W. McGuire, *Percutaneous central venous catheters versus peripheral cannulae for delivery of parenteral nutrition in neonates*. Cochrane Database Syst Rev, 2007(3): p. CD004219.
25. Lucas, A. and T.J. Cole, *Breast milk and neonatal necrotising enterocolitis*. Lancet, 1990. **336**(8730): p. 1519-23.
26. McGuire, W. and M.Y. Anthony, *Donor human milk versus formula for preventing necrotising enterocolitis in preterm infants: systematic review*. Arch Dis Child Fetal Neonatal Ed, 2003. **88**(1): p. F11-4.
27. Schanler, R.J., et al., *Randomized trial of donor human milk versus preterm formula as substitutes for mothers' own milk in the feeding of extremely premature infants*. Pediatrics, 2005. **116**(2): p. 400-6.
28. Boyd, C.A., M.A. Quigley, and P. Brocklehurst, *Donor breast milk versus infant formula for preterm infants: systematic review and meta-analysis*. Arch Dis Child Fetal Neonatal Ed, 2007. **92**(3): p. F169-75.
29. Schanler, R.J., *Suitability of human milk for the low-birthweight infant*. Clin Perinatol, 1995. **22**(1): p. 207-22.
30. Henderson, G., M.Y. Anthony, and W. McGuire, *Formula milk versus maternal breast milk for feeding preterm or low birth weight infants*. Cochrane Database Syst Rev, 2007(4): p. CD002972.
31. Premji, S.S., T.R. Fenton, and R.S. Sauve, *Higher versus lower protein intake in formula-fed low birth weight infants*. Cochrane Database Syst Rev, 2006(1): p. CD003959.
32. Atkinson, S.A., et al., *Randomized Trial of Feeding Nutrient-Enriched vs Standard Formula to Premature Infants during the First Year of Life*. Pediatric Research. **45**(4): p. 276A.
33. Lucas, A., F. King, and N.B. Bishop, *Postdischarge formula consumption in infants born preterm*. Arch Dis Child, 1992. **67**(6): p. 691-2.
34. Ziegler, E.E., P.J. Thureen, and S.J. Carlson, *Aggressive nutrition of the very low birthweight infant*. Clin Perinatol, 2002. **29**(2): p. 225-44.
35. King, C., *What's new in enterally feeding the preterm infant?* Arch Dis Child Fetal Neonatal Ed, 2010. **95**(4): p. F304-8.
36. Bombell, S. and W. McGuire, *Early trophic feeding for very low birth weight infants*. Cochrane Database Syst Rev, 2009(3): p. CD000504.
37. Morgan, J., L. Young, and W. McGuire, *Delayed introduction of progressive enteral feeds to prevent necrotising enterocolitis in very low birth weight infants*. Cochrane Database Syst Rev, 2011(3): p. CD001970.
38. Leaf, A., et al., *Early or late enteral feeding for preterm growth-restricted infants? The abnormal Doppler enteral prescription trial*. Archives of Disease in Childhood, 2010. **95**: p. A3.
39. Morgan, J., L. Young, and W. McGuire, *Slow advancement of enteral feed volumes to prevent necrotising enterocolitis in very low birth weight infants*. Cochrane Database Syst Rev, 2011(3): p. CD001241.
40. Lucas, A., et al., *Randomized outcome trial of human milk fortification and developmental outcome in preterm infants*. Am J Clin Nutr, 1996. **64**(2): p. 142-51.
41. Pearson, F., M.J. Johnson, and A.A. Leaf, *Milk Osmolality - Does it Matter?* Arch Dis Child Fetal Neonatal Ed, 2011. **In press**.
42. Kuschel, C.A. and J.E. Harding, *Multicomponent fortified human milk for promoting growth in preterm infants*. Cochrane Database Syst Rev, 2004(1): p. CD000343.

- 1
  - 2
  - 3
  - 4
  - 5
  - 6
  - 7
  - 8
  - 9
  - 10
  - 11
  - 12
  - 13
  - 14
  - 15
  - 16
  - 17
  - 18
  - 19
  - 20
  - 21
  - 22
  - 23
  - 24
  - 25
  - 26
  - 27
  - 28
  - 29
  - 30
  - 31
  - 32
  - 33
  - 34
  - 35
  - 36
  - 37
  - 38
  - 39
  - 40
  - 41
  - 42
  - 43
  - 44
  - 45
  - 46
  - 47
  - 48
  - 49
  - 50
  - 51
  - 52
  - 53
  - 54
  - 55
  - 56
  - 57
  - 58
  - 59
  - 60
43. Aggett, P.J., et al., *Feeding preterm infants after hospital discharge: a commentary by the ESPGHAN Committee on Nutrition*. *J Pediatr Gastroenterol Nutr*, 2006. **42**(5): p. 596-603.
44. McCormick, F.M., et al., *Multinutrient fortification of human breast milk for preterm infants following hospital discharge*. *Cochrane Database Syst Rev*, 2010(7): p. CD004866.

For peer review only

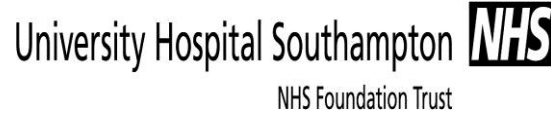

Appendix 1- Nutritional requirements of Preterm Infants

|                       | Extremely Low Birth Weight (<1000g) |             |             |             |            |            |             |             |             |             |            |            | Very Low Birth Weight (<1500g) |             |             |             |            |            |             |             |             |             |            |            |
|-----------------------|-------------------------------------|-------------|-------------|-------------|------------|------------|-------------|-------------|-------------|-------------|------------|------------|--------------------------------|-------------|-------------|-------------|------------|------------|-------------|-------------|-------------|-------------|------------|------------|
|                       | parenteral                          |             |             |             |            |            | enteral     |             |             |             |            |            | parenteral                     |             |             |             |            |            | enteral     |             |             |             |            |            |
|                       | Day 0 Lower                         | Day 0 Upper | Trans Lower | Trans Upper | Grow Lower | Grow Upper | Day 0 Lower | Day 0 Upper | Trans Lower | Trans Upper | Grow Lower | Grow Upper | Day 0 Lower                    | Day 0 Upper | Trans Lower | Trans Upper | Grow Lower | Grow Upper | Day 0 Lower | Day 0 Upper | Trans Lower | Trans Upper | Grow Lower | Grow Upper |
| Energy (kcal)         | 40                                  | 50          | 75          | 85          | 105        | 115        | 50          | 60          | 90          | 100         | 130        | 150        | 40                             | 50          | 60          | 70          | 90         | 100        | 50          | 60          | 75          | 90          | 110        | 130        |
| Protein (g)           | 2                                   | 2           | 3.5         | 3.5         | 3.5        | 4          | 2           | 2           | 3.5         | 3.5         | 3.8        | 4.4        | 2                              | 2           | 3.5         | 3.5         | 3.2        | 3.8        | 2           | 2           | 3.5         | 3.5         | 3.4        | 4.2        |
| Carbohydrate (g)      | 7                                   | 7           | 8           | 15          | 13         | 17         | 7           | 7           | 8           | 15          | 9          | 20         | 7                              | 7           | 5           | 12          | 9.7        | 15         | 7           | 7           | 5           | 12          | 7          | 17         |
| Fat (g)               | 1                                   | 1           | 1           | 3           | 3          | 4          | 1           | 1           | 1           | 3           | 3.2        | 8.4        | 1                              | 1           | 1           | 3           | 3          | 4          | 1           | 1           | 1           | 3           | 5.3        | 7.2        |
| Sodium (mmol)         | 0                                   | 1           | 2           | 5           | 3          | 5          | 0           | 1           | 2           | 5           | 3          | 5          | 0                              | 1           | 2           | 5           | 3          | 5          | 0           | 1           | 2           | 5           | 3          | 5          |
| Chloride (mmol)       | 0                                   | 1           | 2           | 5           | 3          | 7          | 0           | 1           | 2           | 5           | 3          | 7          | 0                              | 1           | 2           | 5           | 3          | 7          | 0           | 1           | 2           | 5           | 3          | 7          |
| Potassium (mmol)      | 0                                   | 0           | 0           | 2           | 2          | 3          | 0           | 0           | 0           | 2           | 2          | 3          | 0                              | 0           | 0           | 2           | 2          | 3          | 0           | 0           | 0           | 2           | 2          | 3          |
| Calcium (mmol)        | 0.5                                 | 1.5         | 1.5         | 1.5         | 1.5        | 2          | 0.8         | 2.5         | 2.5         | 2.5         | 2.5        | 5.5        | 0.5                            | 1.5         | 1.5         | 1.5         | 1.5        | 2          | 0.8         | 2.5         | 2.5         | 2.5         | 5.5        |            |
| Phosphorous (mmol)    | 0                                   | 0           | 1.5         | 1.9         | 1.5        | 1.9        | 0.6         | 1.9         | 1.9         | 4.5         | 1.9        | 4.5        | 0                              | 0           | 1.5         | 1.9         | 1.5        | 1.9        | 0.6         | 1.9         | 1.9         | 4.5         | 1.9        | 4.5        |
| Magnesium (mmol)      | 0                                   | 0           | 0.2         | 0.3         | 0.2        | 0.3        | 0.1         | 0.3         | 0.3         | 0.6         | 0.3        | 0.6        | 0                              | 0           | 0.2         | 0.3         | 0.2        | 0.3        | 0.1         | 0.3         | 0.3         | 0.6         | 0.3        | 0.6        |
| Iron (umol)           | 0                                   | 0           | 0           | 0           | 1.8        | 3.6        | 0           | 0           | 0           | 0           | 35.8       | 71.6       | 0                              | 0           | 0           | 0           | 1.8        | 3.6        | 0           | 0           | 0           | 0           | 35.8       | 71.6       |
| Zinc (umol)           | 0                                   | 2.3         | 2.3         | 2.3         | 6.1        | 6.1        | 0           | 15.3        | 6.1         | 18.3        | 15.3       | 45.9       | 0                              | 2.3         | 2.3         | 2.3         | 6.1        | 6.1        | 0           | 15.3        | 6.1         | 18.3        | 15.3       | 45.9       |
| Copper (umol)         | 0                                   | 0           | 0           | 0.3         | 0.3        | 0.3        | 0           | 0           | 0           | 2.4         | 1.9        | 2.4        | 0                              | 0           | 0           | 0.3         | 0.3        | 0.3        | 0           | 0           | 0           | 2.4         | 1.9        | 2.4        |
| Selenium (nmol)       | 0                                   | 0           | 0           | 16.5        | 19         | 57         | 0           | 0           | 0           | 16.5        | 16.5       | 57         | 0                              | 0           | 0           | 16.5        | 19         | 57         | 0           | 0           | 0           | 16.5        | 16.5       | 57         |
| Iodine (nmol)         | 0                                   | 0           | 0           | 8           | 7.9        | 7.9        | 0           | 0           | 0           | 473         | 79         | 473        | 0                              | 0           | 0           | 8           | 7.9        | 7.9        | 0           | 0           | 0           | 473         | 79         | 473        |
| Manganese (nmol)      | 0                                   | 0           | 0           | 13.7        | 18.2       | 18.2       | 0           | 0           | 0           | 13.7        | 13         | 13.7       | 0                              | 0           | 0           | 13.7        | 18.2       | 18.2       | 0           | 0           | 0           | 13.7        | 13         | 13.7       |
| Vitamin A (IU)        | 700                                 | 1500        | 700         | 1500        | 700        | 1500       | 700         | 1500        | 700         | 1500        | 700        | 1500       | 700                            | 1500        | 700         | 1500        | 700        | 1500       | 700         | 1500        | 700         | 1500        | 700        | 1500       |
| Vitamin D (IU)        | 40                                  | 160         | 40          | 160         | 40         | 160        | 150         | 400         | 150         | 400         | 150        | 400        | 40                             | 160         | 40          | 160         | 40         | 160        | 150         | 400         | 150         | 400         | 150        | 400        |
| Vitamin E (IU)        | 2.8                                 | 3.5         | 2.8         | 3.5         | 2.8        | 3.5        | 6           | 12          | 6           | 12          | 6          | 12         | 2.8                            | 3.5         | 2.8         | 3.5         | 2.8        | 3.5        | 6           | 12          | 6           | 12          | 6          | 12         |
| Vitamin K (ug)        | 0                                   | 0           | 22          | 22          | 22         | 22         | 0           | 0           | 18          | 22          | 18         | 22         | 0                              | 0           | 22          | 22          | 22         | 22         | 0           | 0           | 18          | 22          | 18         | 22         |
| Thiamin (ug)          | 200                                 | 350         | 200         | 350         | 300        | 350        | 180         | 240         | 180         | 240         | 180        | 240        | 200                            | 350         | 200         | 350         | 300        | 350        | 180         | 240         | 180         | 240         | 180        | 240        |
| Riboflavin (ug)       | 150                                 | 200         | 150         | 200         | 150        | 200        | 250         | 360         | 250         | 360         | 250        | 360        | 150                            | 200         | 150         | 200         | 150        | 200        | 250         | 360         | 250         | 360         | 250        | 360        |
| Vitamin B6 (ug)       | 150                                 | 200         | 150         | 200         | 150        | 200        | 150         | 210         | 150         | 210         | 150        | 210        | 150                            | 200         | 150         | 200         | 150        | 200        | 150         | 210         | 150         | 210         | 150        | 210        |
| Folate (ug)           | 56                                  | 56          | 56          | 56          | 56         | 56         | 25          | 50          | 25          | 50          | 25         | 50         | 56                             | 56          | 56          | 56          | 56         | 56         | 25          | 50          | 25          | 50          | 25         | 50         |
| Vitamin B12 (ug)      | 0.3                                 | 0.3         | 0.3         | 0.3         | 0.3        | 0.3        | 0.3         | 0.3         | 0.3         | 0.3         | 0.3        | 0.3        | 0.3                            | 0.3         | 0.3         | 0.3         | 0.3        | 0.3        | 0.3         | 0.3         | 0.3         | 0.3         | 0.3        | 0.3        |
| Biotin (ug)           | 5.8                                 | 5.8         | 5.8         | 5.8         | 5.8        | 5.8        | 3.6         | 6           | 3.6         | 6           | 3.6        | 6          | 5.8                            | 5.8         | 5.8         | 5.8         | 5.8        | 5.8        | 3.6         | 6           | 3.6         | 6           | 3.6        | 6          |
| Pantothenic Acid (mg) | 1.2                                 | 1.2         | 1.2         | 1.2         | 1.2        | 1.2        | 1.2         | 1.7         | 1.2         | 1.7         | 1.2        | 1.7        | 1.2                            | 1.2         | 1.2         | 1.2         | 1.2        | 1.2        | 1.2         | 1.7         | 1.2         | 1.7         | 1.2        | 1.7        |
| Niacin (mg)           | 4                                   | 6.8         | 4           | 6.8         | 4          | 4.6        | 3.6         | 4.8         | 3.6         | 4.8         | 3.6        | 4.8        | 4                              | 6.8         | 4           | 6.8         | 4          | 4.6        | 3.6         | 4.8         | 3.6         | 4.8         | 3.6        | 4.8        |
| Vitamin C (mg)        | 15                                  | 25          | 15          | 25          | 15         | 25         | 18          | 24          | 18          | 24          | 18         | 24         | 15                             | 25          | 15          | 25          | 15         | 25         | 18          | 24          | 18          | 24          | 18         | 24         |
| Taurine (mg)          | 0                                   | 3.75        | 1.88        | 3.75        | 1.88       | 3.75       | 0           | 9           | 4.5         | 9           | 4.5        | 9          | 0                              | 3.75        | 1.88        | 3.75        | 1.88       | 3.75       | 0           | 9           | 4.5         | 9           | 4.5        | 9          |
| Choline (mg)          | 0                                   | 28          | 14.4        | 28          | 14.4       | 28         | 0           | 28          | 14.4        | 28          | 14.4       | 28         | 0                              | 28          | 14.4        | 28          | 14.4       | 28         | 0           | 28          | 14.4        | 28          | 14.4       | 28         |
| Carnitine (mg)        | 0                                   | 2.9         | 2.9         | 2.9         | 2.9        | 2.9        | 0           | 2.9         | 2.9         | 2.9         | 2.9        | 2.9        | 0                              | 2.9         | 2.9         | 2.9         | 2.9        | 2.9        | 0           | 2.9         | 2.9         | 2.9         | 2.9        | 2.9        |
| Inositol (mg)         | 0                                   | 54          | 54          | 54          | 54         | 54         | 0           | 54          | 32          | 81          | 32         | 81         | 0                              | 54          | 54          | 54          | 54         | 54         | 0           | 54          | 32          | 81          | 32         | 81         |

Affix Patient Label Here

## Neonatal Nutritional Screening Tool

*To be completed on admission and weekly  
(every Monday)*

Gestation at birth:

Birth Weight:

**1. Assess Growth**

|                 |  |                  |  |                |  |
|-----------------|--|------------------|--|----------------|--|
| Current Weight: |  | Current Centile: |  | Birth Centile: |  |
| Current OFC:    |  | Current Centile: |  | Birth Centile: |  |
| Current Length: |  | Current Centile: |  | Birth Centile: |  |

**2. Determine Risk Category**

Tick

|               |                                                                                                                                                                                                                                                                                                                                                                                                                                                                     |  |
|---------------|---------------------------------------------------------------------------------------------------------------------------------------------------------------------------------------------------------------------------------------------------------------------------------------------------------------------------------------------------------------------------------------------------------------------------------------------------------------------|--|
| HIGH RISK     | <i>Any one of:</i> <ul style="list-style-type: none"> <li>• Preterm &lt;28 weeks at birth</li> <li>• Extremely Low Birth Weight &lt; 1000g</li> <li>• Severe IUGR (weight &lt; 2<sup>nd</sup> centile and AREFV) &lt;35 weeks</li> <li>• Infant establishing feeds after episode of NEC or GI perforation</li> <li>• Infants with severe congenital GI malformation: gastroschisis</li> <li>• Perinatal hypoxia / ischaemia with multi-organ dysfunction</li> </ul> |  |
| MODERATE RISK | <i>Any one of:</i> <ul style="list-style-type: none"> <li>• Preterm 28-31<sup>+6</sup> weeks, otherwise well</li> <li>• Very Low Birth Weight 1000 - 1500g</li> <li>• Moderate IUGR (weight &lt; 9<sup>th</sup> centile and AREFV) &lt;35 weeks</li> <li>• Baby on inotropes</li> <li>• Baby on indomethacin/ibuprofen</li> <li>• Illness or congenital anomaly which may compromise feeding</li> <li>• Polycythaemia</li> </ul>                                    |  |
| LOW RISK      | <i>Any one of:</i> <ul style="list-style-type: none"> <li>• Preterm 32-36<sup>+6</sup> weeks, otherwise well</li> <li>• AREFV / IUGR <math>\geq</math>35 weeks</li> </ul>                                                                                                                                                                                                                                                                                           |  |
| NO RISK       | <ul style="list-style-type: none"> <li>• Well Term Infant <math>\geq</math>37 weeks</li> </ul>                                                                                                                                                                                                                                                                                                                                                                      |  |

**3. Determine the need for nutrition team review**

The nutrition team should review any infant meeting the following criteria:

Tick

|                                                       |  |
|-------------------------------------------------------|--|
| • High Risk Infants according to criteria above       |  |
| • Not regained birth weight by 2 weeks of age         |  |
| • >15% weight loss at any time                        |  |
| • Weight gain <10g/kg/day from 2 weeks of age onwards |  |
| • Drop through 2 centile lines for weight/HC/length   |  |
| • Intake <150ml/kg/day from 2 weeks of age onwards    |  |
| • NEC or GI surgery at any time                       |  |

Name of person completing assessment: \_\_\_\_\_ Signature: \_\_\_\_\_

***If completing a first assessment on admission, please place this form in the plastic wallet in the baby's clear plastic nursing folder, next to the nutrition flow charts******If completing a a weekly assessment, please place this form in the box outside Room 3 once filled out***

**Nutrition Team Review**

Date: \_\_\_\_\_

Staff Present:

Day: \_\_\_\_\_

Gestation at Birth: \_\_\_\_\_

Corrected Gestation: \_\_\_\_\_

**Current Clinical Issues:**

**Fluid Intake**

Total Prescribed Fluids: ml/kg/day

Enteral Feed Type:

Parenteral Feed Type:

**Nutrient Intake**

**Enteral Feed Provides:**

Milk Feeds: ml/kg/day kcal/kg/day g/kg/day Protein

**Parenteral Feed Provides:**

Aqueous PN: ml/kg/day kcal/kg/day g/kg/day Protein

Lipid: ml/kg/day kcal/kg/day

---

**Total Intake:** ml/kg/day kcal/kg/day g/kg/day Protein

g/kg/day Lipid

*Comments on intake:*

**Bloods**

|        |                 |             |            |
|--------|-----------------|-------------|------------|
| Hb:    | Sodium:         | Creatinine: | ALP:       |
| CRP:   | Potassium:      | Albumin:    | ALT:       |
| Other: | Urea:           | Bili:       | Magnesium: |
|        | Calcium (corr): |             | Phosphate: |

**Assessment**

**Recommendations**

1  
2  
3  
4  
5  
6  
7  
8  
9  
10  
11  
12  
13  
14  
15  
16  
17  
18  
19  
20  
21  
22  
23  
24  
25  
26  
27  
28  
29  
30  
31  
32  
33  
34  
35  
36  
37  
38  
39  
40  
41  
42  
43  
44  
45  
46  
47  
48  
49  
50  
51  
52  
53  
54  
55  
56  
57  
58  
59  
60

# BMJ Open

## Successfully implementing and embedding guidelines to improve the nutrition and growth of preterm infants in neonatal intensive care: A prospective interventional study

|                                 |                                                                                                                                                                                                                                                                                                                                                                                                                                                                                                                                                                                                                                                                                                                                                                                                                                                                                                                                                                                                                            |
|---------------------------------|----------------------------------------------------------------------------------------------------------------------------------------------------------------------------------------------------------------------------------------------------------------------------------------------------------------------------------------------------------------------------------------------------------------------------------------------------------------------------------------------------------------------------------------------------------------------------------------------------------------------------------------------------------------------------------------------------------------------------------------------------------------------------------------------------------------------------------------------------------------------------------------------------------------------------------------------------------------------------------------------------------------------------|
| Journal:                        | <i>BMJ Open</i>                                                                                                                                                                                                                                                                                                                                                                                                                                                                                                                                                                                                                                                                                                                                                                                                                                                                                                                                                                                                            |
| Manuscript ID                   | bmjopen-2017-017727.R1                                                                                                                                                                                                                                                                                                                                                                                                                                                                                                                                                                                                                                                                                                                                                                                                                                                                                                                                                                                                     |
| Article Type:                   | Research                                                                                                                                                                                                                                                                                                                                                                                                                                                                                                                                                                                                                                                                                                                                                                                                                                                                                                                                                                                                                   |
| Date Submitted by the Author:   | 07-Aug-2017                                                                                                                                                                                                                                                                                                                                                                                                                                                                                                                                                                                                                                                                                                                                                                                                                                                                                                                                                                                                                |
| Complete List of Authors:       | Johnson, Mark; University Hospital Southampton NHS Foundation Trust and University of Southampton, National Institute for Health Research Southampton Biomedical Research Centre; University Hospital Southampton NHS Foundation Trust, Department of Neonatal Medicine Leaf, Alison; University Hospital Southampton NHS Foundation Trust and University of Southampton, National Institute for Health Research Southampton Biomedical Research Centre; University Hospital Southampton NHS Foundation Trust, Department of Neonatal Medicine Pearson, Freya; University Hospital Southampton NHS Foundation Trust, Department of Neonatal Medicine Clark, Howard; University Hospital Southampton NHS Foundation Trust, Department of Neonatal Medicine; University of Southampton, Faculty of Medicine Dimitrov, Borislav; University of Southampton, Primary Care and Population Sciences Pope, Catherine; University of Southampton, Health Sciences May, Carl; University of Southampton, Faculty of Health Sciences |
| <b>Primary Subject Heading</b>: | Health services research                                                                                                                                                                                                                                                                                                                                                                                                                                                                                                                                                                                                                                                                                                                                                                                                                                                                                                                                                                                                   |
| Secondary Subject Heading:      | Nutrition and metabolism, Paediatrics                                                                                                                                                                                                                                                                                                                                                                                                                                                                                                                                                                                                                                                                                                                                                                                                                                                                                                                                                                                      |
| Keywords:                       | Change management < HEALTH SERVICES ADMINISTRATION & MANAGEMENT, Protocols & guidelines < HEALTH SERVICES ADMINISTRATION & MANAGEMENT, Neonatal intensive & critical care < INTENSIVE & CRITICAL CARE, NEONATOLOGY, NUTRITION & DIETETICS                                                                                                                                                                                                                                                                                                                                                                                                                                                                                                                                                                                                                                                                                                                                                                                  |
|                                 |                                                                                                                                                                                                                                                                                                                                                                                                                                                                                                                                                                                                                                                                                                                                                                                                                                                                                                                                                                                                                            |

SCHOLARONE™  
Manuscripts

1  
2  
3  
4 1 **Successfully implementing and embedding guidelines to improve the nutrition**  
5 2 **and growth of preterm infants in neonatal intensive care: A prospective**  
6 3 **interventional study**

7  
8  
9 4 *Mark J Johnson*<sup>1,2</sup> ([m.johnson@soton.ac.uk](mailto:m.johnson@soton.ac.uk)), *Alison A Leaf*<sup>1,2</sup> ([a.a.leaf@soton.ac.uk](mailto:a.a.leaf@soton.ac.uk)), *Freya*  
10 5 *Pearson*<sup>2</sup> ([freya.pearson@uhs.nhs.uk](mailto:freya.pearson@uhs.nhs.uk)), *Howard W. Clark*<sup>2,3</sup> ([h.w.clark@soton.ac.uk](mailto:h.w.clark@soton.ac.uk)) *Borislav D. Dimitrov*<sup>4</sup>,  
11 6 *Catherine Pope*<sup>5</sup> ([c.j.pope@soton.ac.uk](mailto:c.j.pope@soton.ac.uk)) & *Carl R. May*<sup>5</sup> ([c.r.may@soton.ac.uk](mailto:c.r.may@soton.ac.uk))

12  
13  
14 7 <sup>1</sup>National Institute for Health Research, Southampton Biomedical Research Centre, University Hospital  
15 8 Southampton NHS Foundation Trust and University of Southampton, Southampton, UK

16  
17  
18 9 <sup>2</sup>Department of Neonatal Medicine, Princess Anne Hospital, University Hospital Southampton NHS  
19 10 Foundation Trust, Southampton, UK

20  
21  
22 11 <sup>3</sup>University Child Health, Faculty of Medicine, University of Southampton, Southampton, Hampshire, UK

23  
24 12 <sup>4</sup>Primary Care and Population Sciences, Faculty of Medicine, University of Southampton, Southampton,  
25 13 Hampshire, UK

26  
27  
28 14 <sup>5</sup>Faculty of Health Sciences, University of Southampton, Southampton, Hampshire, UK

29  
30  
31 15 **Corresponding Author**

32  
33 16 Mark J. Johnson  
34 17 Department of Neonatal Medicine  
35 18 Mailpoint 105 Level E  
36 19 University Hospital Southampton NHS Foundation Trust  
37 20 Princess Anne Hospital  
38 21 Coxford Road  
39 22 Southampton  
40 23 Hants  
41 24 SO16 5YA  
42 25 Tel: +442381204643  
43 26 Email: [m.johnson@soton.ac.uk](mailto:m.johnson@soton.ac.uk)  
44  
45  
46  
47  
48

49 28 **Keywords:** Implementation, Premature Infant, Nutrition, Nutritional Assessment, Growth  
50  
51  
52

53  
54 30 **Word Count:** 4256  
55  
56  
57  
58  
59  
60



**32 ABSTRACT****33 Objectives**

34 We aimed to improve the nutritional care of preterm infants by developing a complex (multifaceted)  
35 intervention intended to translate current evidence into practice. We used the sociological framework  
36 of Normalization Process Theory (NPT), to guide implementation in order to embed the new practices  
37 into routine care,

**38 Design**

39 A prospective interventional study with a before and after methodology

**40 Participants**

41 Infants <30 weeks gestation or <1500g at birth.

**42 Setting**

43 Tertiary neonatal intensive care unit

**44 Interventions**

45 The intervention was introduced in phases: Phase 1 (Control period, Jan-Aug 2011); Phase 2 (Partial  
46 Implementation; improved parenteral and enteral nutrition solutions, nutrition team, education, Aug-  
47 Dec 2011); Phase 3 (Full implementation; guidelines, screening tool, 'nurse champions', Jan-Dec 2012);  
48 Phase 4 (Post implementation; Jan-Jun 2013). Bi-monthly audits and staff NPT questionnaires were used  
49 to measure guideline compliance and 'normalisation' respectively. NPT scores were used to guide  
50 implementation in real time. Data on nutrient intakes and growth were collected continuously.

**51 Results**

52 There were 52, 36, 75 and 35 infants in phases 1, 2, 3 and 4 respectively. Mean guideline compliance  
53 exceeded 75% throughout the intervention period, peaking at 85%. Guideline compliance and NPT  
54 scores both increased over time, ( $r=0.92$  and  $0.15$ ,  $p<0.03$  for both), with a significant linear association  
55 between the two ( $r=0.21$ ,  $p<0.01$ ). There were significant improvements in daily protein intake and  
56 weight gain between birth and discharge in phases 2 and 3 compared to phase 1 ( $p<0.01$  for all), which  
57 were sustained into phase 4.

**58 Conclusions**

59 NPT and audit results suggest that the intervention was rapidly incorporated into practice, with high  
60 guideline compliance and accompanying improvements in protein intake and weight gain. NPT appears  
61 to offer an effective way of implementing new practices such that they lead to sustained changes in  
62 care. Complex interventions based on current evidence can improve both practice and clinical  
63 outcomes.

64

1  
2  
3  
4  
5  
6  
7  
8  
9  
10  
11  
12  
13  
14  
15  
16  
17  
18  
19  
20  
21  
22  
23  
24  
25  
26  
27  
28  
29  
30  
31  
32  
33  
34  
35  
36  
37  
38  
39  
40  
41  
42  
43  
44  
45  
46  
47  
48  
49  
50  
51  
52  
53  
54  
55  
56  
57  
58  
59  
60

65 **ARTICLE SUMMARY**

66 **Strengths and Limitations of the this study**

- 67 • This study was novel in using a sociological theory (Normalisation Process Theory) to both guide  
68 and measure the process of implementation
- 69 • This study shows that complex interventions, when properly implemented, can change practice  
70 in a sustained fashion
- 71 • The before and after methodology used in this study is a limitation and means result should be  
72 interpreted with caution, but allowed the implementation process to be studied more closely  
73 and in 'real world' conditions.

74  
75  
76  
77  
78

For peer review only

1  
2  
3 79 **MAIN MANUSCRIPT TEXT**  
4  
5

6 80 **BACKGROUND**  
7  
8

9  
10 81 Attempts to span translational gaps and implement evidence-based practice into routine clinical practice  
11  
12 82 often fail [1, 2]. This can mean that patients fail to receive optimal treatment, or conversely may mean  
13  
14 83 they receive unnecessary or potentially harmful care. Neonatal intensive care offers important  
15  
16 84 opportunities for professional behaviour change and practice implementation but is a complex and  
17  
18 85 demanding environment. The Neonatal Intensive Care Unit (NICU) has very vulnerable patients with  
19  
20  
21 86 complex and multiple medical problems, and a large multidisciplinary healthcare team working variable  
22  
23 87 shift patterns. It is also a highly technological and information rich environment. Staff must manage and  
24  
25 88 assimilate a constantly changing array of clinical information from a variety of sources, including  
26  
27  
28 89 monitoring equipment and computerised results systems. It is an interaction rich environment too: with  
29  
30 90 complex interactions between different professionals, parents and patients themselves. It is a  
31  
32 91 demanding environment to work in, with priorities constantly changing across the unit as new patients  
33  
34  
35 92 are admitted or others become clinically unstable.  
36  
37

38 93 The nutritional care and growth of preterm infants managed in the NICU is an important example of the  
39  
40 94 problem of translating evidence into practice. Recommendations for nutrient intakes have been  
41  
42 95 published [3, 4], however there is evidence that these are not effectively integrated into clinical practice  
43  
44 96 [5]. There is also evidence that inconsistent and variable nutritional care may be partly responsible for  
45  
46 97 sub-optimal growth. Neonatal units offering the same level of care have reported significant variations  
47  
48 98 in rates of postnatal growth restriction and in length of stay, with differences in feeding practices shown  
49  
50 99 to be one of the factors responsible for this variation [6]. Taking this together with the complexity of the  
51  
52  
53 100 NICU environment, it is understandable that current evidence and recommendations for practice fail to  
54  
55  
56 101 be consistently assimilated. We have recently discussed the issues surrounding context and complexity,  
57  
58  
59  
60

1  
2  
3 102 and it is clear that context has a profound effect on the extent to which new practices can be  
4  
5 103 successfully implemented [7].  
6  
7

8  
9 104 In this paper we describe the successful implementation of a nutrition guideline for preterm infants in a  
10  
11 105 UK NICU leading to sustained change in practice. We show how integrating this guideline into patient  
12  
13 106 care effectively required a carefully designed programme of translational work that facilitated both  
14  
15 107 professional behaviour change (when professionals work differently) and practice implementation  
16  
17 108 (when they embed new ways of conceptualizing, enacting and organizing practice into their workflow).  
18  
19 109 We explain the operation of this programme of translational work using Normalization Process Theory  
20  
21 110 (NPT) [8, 9], a conceptual tool-kit that helped us both to plan guideline implementation and to  
22  
23 111 understand its dynamics [10]. More than 250 studies have now been reported that employ NPT. It offers  
24  
25 112 a rigorous and transferable explanatory model of the mechanisms that promote implementation  
26  
27 113 processes and fits well with the MRC Framework for Evaluating Complex Interventions [11, 12]. NPT has  
28  
29 114 four main constructs; Coherence (whether people understand the need for change), Cognitive  
30  
31 115 Participation (whether people understand the change itself and what they need to do to enact new  
32  
33 116 practices), Collective action (whether people actually do the work needed for the new practices) and  
34  
35 117 Reflexive monitoring (whether people see the benefit of the new practices in their daily work). In **Figure**  
36  
37 118 **1**, we show how the mechanisms that drive implementation processes are characterised in NPT. Whilst  
38  
39 119 NPT provides a robust model of implementation that has often been used retrospectively to explain  
40  
41 120 these process, it has less frequently been used to develop, guide and drive implementation  
42  
43 121 prospectively as it was in the present study.  
44  
45  
46  
47  
48  
49

50  
51 122  
52  
53 123 **METHODS**  
54  
55  
56  
57  
58  
59  
60

1  
2  
3 124 **Aims.** We hypothesized that (i) the implementation of an evidence-based nutrition guideline for preterm  
4  
5 125 infants would improve nutrient intakes and growth; and (ii) that the use of NPT to monitor and guide  
6  
7 126 implementation of the guideline would result in its successful integration into practice. We anticipated  
8  
9  
10 127 that improvements in nutrient intake and growth that would follow from successful implementation  
11  
12 128 would have important health benefits.

13  
14  
15  
16 129 **Setting and sample.** The study was conducted in a NICU in the South of England. Inborn infants with a  
17  
18 130 gestational age less than 30 weeks or birth weight less than 1501g were eligible for inclusion in the  
19  
20 131 study, and were automatically included from birth to receive the newly implemented service for the  
21  
22 132 provision and monitoring of nutrition for preterm infants. Staff were eligible for inclusion in the study if  
23  
24 133 they were qualified clinicians (nurses, doctors, dietitians) rostered to NICU during the phase 2, 3 and 4 of  
25  
26 134 the implementation study. They took part in individual structured (questionnaire) data collection using  
27  
28 135 an online tool, and semi-structured (qualitative) interviews and focus groups facilitated by MJJ. The  
29  
30 136 study was approved by an NHS Research Ethics Committee, ('Oxford 'B' Reference 11/sc/0365). **Figure 2**  
31  
32 137 shows a flow chart of the study.

33  
34  
35  
36  
37 138 **Intervention development.** A complex intervention was developed with the aim of translating evidence  
38  
39 139 about the nutritional care of preterm infants into practice. It was based on current literature and  
40  
41 140 practice recommendations available at the time (see additional file 1). To improve the likelihood of  
42  
43 141 implementation and embedding in practice, each component of the intervention also aimed to target  
44  
45 142 implementation mechanisms identified by NPT[13]. The implementation intervention had seven major  
46  
47 143 components:

- 48  
49  
50  
51  
52 144
  - A comprehensive nutrition guideline (see additional file 1).
- 53  
54 145
  - A screening tool to identify nutritional risk, linked to specific guideline pathways and nutrition
- 55  
56 146 review [14].
- 57  
58  
59  
60

- 1  
2  
3 147   ▪ Improved nutritional products: Stock PN solutions were revised to provide more nutrition in a  
4  
5 148   smaller volume and new formula milks and breast milk fortifier introduced with higher nutritional  
6  
7  
8 149   content.
- 9  
10 150   ▪ A multidisciplinary nutrition support team, (consultant neonatologist with an interest in nutrition, a  
11  
12 151   neonatal dietitian, a neonatal pharmacist and nurse champions).
- 13  
14 152   ▪ Nurse champions seconded one day in five to the nutrition team to improve their knowledge and  
15  
16 153   skills nutritional care, and four days in five working clinically, supporting their colleagues in the new  
17  
18 154   ways of working[15].
- 19  
20 155   ▪ A weekly nutrition ward round to review infants at the highest nutritional risk and provide additional  
21  
22 156   management plans for nutrition

23  
24  
25  
26  
27 157   Once developed, the clinical guidelines were circulated to staff and two focus groups held in order to  
28  
29 158   both raise awareness of the changes in practice and to gain insight into potential barriers or facilitators  
30  
31 159   to the implementation process, enabling tailoring of the guidelines to the local setting.

32  
33  
34  
35 160   **Guideline implementation.** This was an observational study. Data were collected in discrete periods  
36  
37 161   between January 2011 and June 2013:

- 38  
39  
40 162   a. **Control period** (1st January 2011 and 31st July 2011). Nutrient intake and growth data on infants  
41  
42 163   born during this period were collected retrospectively after the study had finished in order to  
43  
44 164   provide a contemporaneous 'control' group.
- 45  
46  
47 165   b. **Intervention planning and introduction of improved nutrition products** (August 1st – December  
48  
49 166   31st 2011). Nutrient intake and growth data on infants were collected prospectively during this  
50  
51 167   period, during which some elements of the intervention (including improved nutritional solutions)  
52  
53 168   were introduced, and staff were consulted about guideline intervention and its associated changes  
54  
55  
56  
57  
58  
59  
60

1  
2  
3 169 in organization and practice. In addition, the work with staff carried out during this period to  
4  
5 170 develop the intervention would also be likely to begin to affect practice.  
6  
7

8 171 c. **Facilitated guideline implementation** (January 1st- December 31st 2012) during which the full  
9  
10 172 complex intervention was implemented. Nutrient intake and growth data on infants were collected  
11  
12 173 prospectively and audits of guideline compliance and staff NPT Toolkit questionnaires were carried  
13  
14 174 out bi-monthly.  
15  
16

17 175 d. **Post-implementation phase** (January 1st- June 30th 2013). Nutrient intake and growth data on  
18  
19 176 infants were collected prospectively during this period, and one final audit of guideline compliance  
20  
21 177 was carried out to assess the degree to which the new practices remained in place after the main  
22  
23 178 intervention period.  
24  
25  
26

27 179 **Patient outcomes.** Infant outcomes of primary interest were (i) differences in mean daily energy and  
28  
29 180 protein intakes during stay on NICU between pre-implementation and intervention periods, and (ii)  
30  
31 181 differences in the change in weight and head circumference standard deviation scores (SDS) between  
32  
33 182 birth and discharge. These data were collected by entering infant chart data on fluid and feed intake into  
34  
35 183 a specially designed spreadsheet, which was pre-programmed with the nutrient content of feeds and  
36  
37 184 fluids available on the NICU, and automatically calculated daily energy and protein intakes for each  
38  
39 185 infant. Intakes of energy and protein were calculated as raw values but also as a percentages of the  
40  
41 186 Recommended Range of Intake (RRI) according to Tsang et al 2005, which were the recommendations  
42  
43 187 for the nutritional intake of preterm infants at that time[3]. Of note, these have since been updated by  
44  
45 188 Koletzko et al in 2014, which recommends a slightly higher range of energy intake (110-30kcal/kg/d  
46  
47 189 compared to Tsang's 110-120kcal/kg/day) and higher range of protein intake (3.5-4.5g/kg/day compared  
48  
49 190 to Tsang's 3.0-3.6g/kg/d)[16]. Growth data were collected in a similar manner and converted to SDS  
50  
51 191 using the LMS growth add in for Microsoft Excel using reference data from the UK-WHO Newborn Infant  
52  
53  
54  
55  
56  
57  
58  
59  
60

1  
2  
3 192 Close Monitoring growth chart. Growth was measured as the change in SDS between birth and  
4  
5 193 discharge. Differences in patient outcomes were also detected by monitoring routinely collected data on  
6  
7  
8 194 mortality, morbidity (e.g. necrotising enterocolitis; chronic lung disease; retinopathy of prematurity;  
9  
10 195 severe Intraventricular haemorrhage; late onset sepsis) and length of stay.

11  
12  
13 196 **Guideline normalization and compliance.** Measures of nutritional processes were extracted from  
14  
15 197 patient charts at the time of nutritional data entry: time of starting enteral feeds, time of starting PN,  
16  
17 198 time of starting breast milk fortifier and type of feed at discharge. Audits of compliance with the  
18  
19 199 nutrition guideline were carried out throughout the full implementation period, and again at the end of  
20  
21 200 the post-implementation period [17]. Audits were carried out every two months in the implementation  
22  
23 201 phase, and once in the post-implementation phase. Measures of the normalization of guideline  
24  
25 202 compliance were made using a questionnaire based on the NPT online toolkit  
26  
27 203 ([www.normalizationprocess.org](http://www.normalizationprocess.org)). This was adapted to ensure that questions related to implementing  
28  
29 204 and embedding the nutrition guideline in practice. This was made available to staff online using  
30  
31 205 [www.freeonlinesurveys.com](http://www.freeonlinesurveys.com). Respondents were asked to score their level of agreement with each of  
32  
33 206 the 16 items between one and ten. This provided overall scores for each of the four domains of NPT  
34  
35 207 (sense-making, participation, action and monitoring). Staff completed questionnaires anonymously.

36  
37 208 **Statistical analysis.** Descriptive statistics was used to summarise the demographic and outcome  
38  
39 209 variables. The outcome variables were tested for normality using the Kolmogorov–Smirnov test in order  
40  
41 210 to help determine the nature of the analysis methods used, with  $p < 0.05$  indicating that the tested  
42  
43 211 variable distribution differed from a normal distribution. For normally distributed continuous variables,  
44  
45 212 the mean and standard deviation were calculated, with the median and interquartile range calculated  
46  
47 213 for other continuous variables. Distribution of categorical variables was presented as frequency and  
48  
49 214 percentage. Comparison of daily nutrient intake and growth data between periods was carried out using  
50  
51  
52  
53  
54  
55  
56  
57  
58  
59  
60



1  
2  
3 215 general linear models with mixed effects. This statistical technique accounts for repeated measures in  
4  
5 216 the same infant, allowing the addition of other potentially confounding variables (sex, gestational age at  
6  
7  
8 217 birth and birth weight) and subsequent adjustment of the model. Post-hoc Tukey's test was used to  
9  
10 218 adjust significance values in view of multiple comparisons. For normally distributed data, a type of  
11  
12 219 general linear model was used, whilst for non-normally distributed data a type of generalized linear  
13  
14 220 model was used in which repeated effects are considered random effects. Missing data were left as  
15  
16 221 missing and not imputed.

17  
18  
19  
20 222 Mortality and morbidity data and other dichotomous outcomes were compared across study periods  
21  
22 223 using  $X^2$  tests (or Fishers Exact test where numbers were low). Continuous process outcome measures  
23  
24 224 were compared across study periods using either a two-way ANOVA (for normally distributed data) or  
25  
26 225 the Kruskal-Wallis test (for non-normally distributed data). If significant differences were found then  
27  
28 226 comparisons between pairs of groups were further analysed with post hoc adjustment by Tukey's test  
29  
30 227 (normally distributed data) or multiple Mann-Whitney-U tests (non-normally distributed data).

31  
32  
33  
34 228 Guideline compliance audit results and measures of the 'normalisation' of practice (using scores from  
35  
36 229 the online NPT questionnaire) were summarised as mean scores and plotted over time. Multiple linear  
37  
38 230 regression was used to describe the nature of the relationship between mean percentage audit  
39  
40 231 compliance and NPT scores over time. A similar approach was then used to relate mean percentage  
41  
42 232 audit compliance and NPT scores to the primary infant outcome measures. Plots of mean percentage  
43  
44 233 audit compliance and NPT scores were overlaid with plots of energy intakes, protein intakes and the  
45  
46 234 differences in weight and head circumference SDS between birth and discharge over time during the  
47  
48 235 intervention period. The analyses were carried out using Stata IC v12.3 (Stata Corp) and SAS 9.3 (SAS  
49  
50 236 Institute Inc.).

51  
52  
53  
54  
55  
56 237  
57  
58  
59  
60

238

239

240 **RESULTS**

241 **Measures of Infant Outcomes.** Table 1 summarises the sex, gestational age at birth and birth weight of  
 242 infants in each study period. CRIB II[18] scores are also shown as an indication of illness severity. CRIB II  
 243 scores were not available for all infants and the numbers available with CRIB scores are also shown in  
 244 Table 2. There were no significant differences in sex, birth weight or gestational age between groups.  
 245 There was a significant difference in CRIB II scores between groups ( $p=0.008$ ), with post hoc pairwise  
 246 testing using Tukey's method revealing that only group D was significantly different (higher) from all the  
 247 others. This suggests an increased level of illness severity in group D when interpreting results.

248

| Period                                             | n  | Male (%)  | Mean Birth weight (SD) | Mean Gestational Age (SD) | Mean CRIB II (SD), n |
|----------------------------------------------------|----|-----------|------------------------|---------------------------|----------------------|
| A. Pre-implementation period (Jan 2011 – Jul 2011) | 52 | 23 (44.2) | 1.084 (0.270)          | 29.2 (2.6)                | 7.0 (3.6), 30        |
| B. Partial implementation period (Aug – Dec 2011)  | 36 | 18 (50)   | 1.029 (0.311)          | 29.2 (2.9)                | 6.4 (3.9), 20        |
| C. Main Intervention Period (Jan – Dec 2012)       | 75 | 37 (49.3) | 0.998 (0.269)          | 28.7 (3.0)                | 6.9 (2.5), 44        |
| D. Post-implementation period (Jan – Jun 2013)     | 35 | 22 (62.9) | 0.924 (0.261)          | 28.1 (2.8)                | 9.7 (3.2), 18        |
| p value for difference between groups (ANOVA)      |    | 0.392*    | 0.066                  | 0.290                     | <b>0.008</b>         |

249 **Table 1:** Infant Characteristics in each study group (SD-Standard Deviation) \*p value is for  $\chi^2$

| Outcome                              | Mean nutritional process audit compliance |                          |
|--------------------------------------|-------------------------------------------|--------------------------|
|                                      | Model with Time Excluded                  | Model with Time Included |
| Mean NPT Score Coefficient (p value) | 0.95 (0.002)                              | 0.40 (0.031)             |
| Time coefficient (p value)           | Omitted                                   | 0.72 (<0.0001)           |
| p value for model                    | 0.0018                                    | <0.0001                  |
| r for model                          | 0.2098                                    | 0.8076                   |
| r <sup>2</sup> for model             | 0.044                                     | 0.6522                   |

**Table 2:** Results of linear regression for mean audit compliance measures and mean NPT scores over time.

**Nutrient Intakes over time.** When compared with baseline data, progressive increases in protein intake were observed over the course of the study. **Figures 3a-d** show the results of the generalised linear modelling analysis for median daily nutrient intakes for each of energy (kcal/kg/day), protein (g/kg/day), energy (as a percentage of RRI) and protein (as a percentage of RRI) respectively, and data tables showing the intake and differences between periods are given in additional file 2. Using Tukey's test to compare the difference between each period, there were significant improvements in protein intake in period B and C compared to period A (both  $p < 0.001$ ), and this was sustained beyond the intervention into period D ( $p < 0.01$  vs periods A and B). Although there was no significant difference between the partial intervention period (B) and the main intervention period (C) in terms of protein intake, there was a significant increase in protein intake between the partial intervention period (B) and the post implementation period (D).

**Growth over time** The results of the general linear model using mixed effects for the changes in weight and head circumference SDS in each study period are shown in **Figure 4**, and data tables showing the intake and differences between periods are given in additional file 2. Using Tukey's test to compare the difference between each period, there was a significant and sequential improvement in the change in standard deviation score from birth (cSDS) for weight in period B and C compared to period A (both  $p < 0.01$ ), which again were sustained post implementation in period D ( $p < 0.001$  vs periods A and B).

1  
2  
3 268 There was also a significant improvement in weight between the partial intervention period (B) and the  
4  
5 269 main intervention period (C), suggesting full implementation further added to the intervention effect.  
6  
7  
8 270 This demonstrates that there was a sequential improvement in the difference in weight SDS between  
9  
10 271 birth and discharge in each period during the study. There was a non-significant improvement in the  
11  
12 272 cSDS for head circumference (HC) across the study.

13  
14  
15 273 **Mortality and Morbidity.** No significant differences were detected in the rates of mortality, chronic lung  
16  
17 274 disease, necrotising enterocolitis, severe intraventricular haemorrhage, retinopathy of prematurity and  
18  
19 275 late onset infection.  
20  
21  
22

23 276

24  
25  
26 277

### 278 **Professional behaviour change and practice implementation**

29  
30  
31  
32 279 **Timing of commencement of feeds and types of feed.** There were no significant differences in the  
33  
34 280 number of babies receiving breast milk, preterm formula, term formula or mixed feeding at discharge  
35  
36 281 between phases of the study. There were no significant changes in the proportion of breast milk fed  
37  
38 282 infants receiving fortifier, nor were there differences in the time to start enteral feeds or the time of  
39  
40 283 starting fortifier in infants receiving breast milk between study periods. However, there were differences  
41  
42 284 in the median time to starting parenteral nutrition between the phases of the study. In the baseline or  
43  
44 285 control phase of the study this was 15 hrs. Over the pre-implementation and implementation phases of  
45  
46 286 the study this reduced to nine hours. In the post implementation phase this rose to 12 hours. A  
47  
48 287 significant difference between study phases was detected using the Kruskal-Wallis test ( $p=0.013$ ).  
49  
50  
51  
52

53 288  
54  
55  
56  
57  
58  
59  
60

1  
2  
3 289 **Adherence to Guideline.** Bimonthly guideline compliance audits – described in Figure 2 – during the  
4  
5 290 intervention phase and at the end of the post-implementation phase showed that mean compliance  
6  
7 291 improved incrementally across the implementation phase, but there was a slight decrease in compliance  
8  
9 292 at the final audit in July 2013. Linear regression of mean nutritional audit compliance during the 12  
10  
11 293 months of the intervention period demonstrated a significant linear increase over time, with a  
12  
13 294 regression coefficient of 1.1 ( $r=0.92$ ,  $p=0.009$ ).  
14  
15  
16  
17  
18 295  
19  
20

21 296 **Normalisation Process Theory Scores.** Taking into account participant dropout due to staff turnover,  
22  
23 297 response rates to the NPT Toolkit questionnaire peaked at 74% in May 2012, falling to 27% in the final  
24  
25 298 questionnaire in July 2013. Details regarding the number and type of respondents can be seen in **table**  
26  
27  
28 299 **3. Figure 5** shows NPT scores as radar plots for each time period ; in general, the fuller the radar plot,  
29  
30 300 the greater extent to which staff felt that the practices were part of ‘normal practice’ at that time. Radar  
31  
32 301 plots generally become fuller over time, though some key areas of the plots were less full at different  
33  
34 302 time points, indicating areas for improvement. The items relating to collective action and reflexive  
35  
36 303 monitoring were scoring lower early in the intervention period, indicating that staff could not see the  
37  
38 304 benefit of the intervention in their work. In order to address this, the results of the study to date were  
39  
40 305 displayed around the staff areas of NICU in August 2012, with a subsequent improvement in the related  
41  
42 306 NPT scores. There was a significant linear increase in mean NPT score over time (coefficient=0.031,  
43  
44 307  $r=0.15$ ,  $p=0.023$ ), though this dropped off during the post-implementation phase. **Figure 6** shows that  
45  
46 308 global NPT scores and guideline compliance increased together over time and then flattened out in the  
47  
48 309 post implementation phase. Linear regression analysis showed that there was a significant association  
49  
50 310 between mean global NPT scores and audit compliance through the intervention development,  
51  
52 311 implementation and post-implementation phases of the study with a coefficient of 0.95 ( $r=0.21$ ,  
53  
54  
55  
56  
57  
58  
59  
60

312 p=0.002, see table 2). The addition of time as a variable into the linear regression models (to account for  
 313 the repeated measures nature of the data) is also shown in table 2. The addition of time significantly  
 314 contributed to the increases in compliance over the study and increased the predictive value of the  
 315 model, though despite this the mean NPT scores remained a significant predictor, showing that the  
 316 measures of normalisation using NPT are associated with measures of clinical practice. Linear regression  
 317 using the mean individual construct scores for NPT showed a significant association with the mean audit  
 318 scores and participants' capacity to monitor the effects of their actions (*reflexive monitoring*), both  
 319 before and after adjustment for the effect of time (coefficients of 0.89 and 0.51, p=0.034 and p=0.044  
 320 with and without adjustment for time respectively).

| Time Period                       | Mar-12    | May-12    | Jul-12    | Sep-12    | Nov-12   | Jan-13   | Jul-13   |
|-----------------------------------|-----------|-----------|-----------|-----------|----------|----------|----------|
| Number of Respondents             | 44        | 52        | 39        | 26        | 24       | 18       | 16       |
| Percentage Response Rate          | 57.9      | 74.3      | 58.2      | 41.3      | 40.7     | 31       | 27       |
| Number (%) Consultants            | 4 (9.1)   | 4 (7.7)   | 4 (10.3)  | 4 (15.4)  | 4 (16.7) | 3 (16.7) | 4 (25)   |
| Number (%) Junior Doctors/ANNPs   | 1 (2.3)   | 3 (5.8)   | 3 (7.7)   | 0 (0)     | 0 (0)    | 0 (0)    | 0 (0)    |
| Number (%) Pharmacists            | 1 (2.3)   | 1 (1.9)   | 1 (2.6)   | 0 (0)     | 0 (0)    | 0 (0)    | 0 (0)    |
| Number (%) Band 7 Nurses          | 4 (9.1)   | 4 (7.7)   | 2 (5.1)   | 3 (11.5)  | 5 (20.8) | 2 (11.1) | 2 (12.5) |
| Number (%) Band 6 Nurses          | 10 (22.7) | 9 (17.3)  | 6 (15.4)  | 7 (26.9)  | 6 (25.0) | 5 (27.8) | 4 (25.0) |
| Number (%) Band 5 Nurses          | 19 (43.1) | 23 (44.2) | 18 (46.2) | 10 (38.5) | 6 (25.0) | 5 (27.8) | 4 (25)   |
| Number (%) Band 4 Nurses          | 2 (4.6)   | 4 (7.7)   | 2 (5.1)   | 1 (3.9)   | 1 (4.2)  | 0 (0)    | 2 (12.5) |
| Number (%) Band 3 Nurses or lower | 3 (6.8)   | 4 (7.7)   | 3 (7.7)   | 1 (3.85)  | 2 (8.3)  | 1 (5.6)  | 1 (6.3)  |

**Table 3:** Number of respondents and percentage response rate for each NPT questionnaire

1  
2  
3 324 **DISCUSSION**  
4  
5

6 325 We evaluated the effects of guideline implementation by measuring objective changes in nutrition  
7  
8 326 intake. These data are important in their own right, but can also be used to corroborate subjective self-  
9  
10 327 reports of behaviour change and practice implementation by staff. Objective improvements in nutrient  
11  
12 328 intake and weight gain were detected in infants across the four data collection periods. Against this  
13  
14 329 background, mean audit guideline compliance and NPT scores both increased in a linear fashion over  
15  
16 330 time. Impressively, mean guideline compliance was in excess of 75% throughout the intervention period,  
17  
18 331 peaking at 85%. The headline result of this study is that implementation of the guideline was  
19  
20 332 successfully achieved, and that activities associated with specific intervention components were  
21  
22 333 routinely embedded in workflow within the NICU. This paper has described the successful  
23  
24 334 implementation of a nutrition guideline for preterm infants in NICU, leading to sustained change in  
25  
26 335 practice and improved nutritional outcomes. During the time this study was active, other groups have  
27  
28 336 used similar approaches in the preterm population in order to try and improve infant growth in NICU  
29  
30 337 [19, 20]. They also used before and after study designs, but did not include a process evaluation.  
31  
32  
33  
34  
35  
36

37 338 Our study has shown that implementing a facilitated nutrition guideline in NICU using a multifaceted  
38  
39 339 intervention improved protein intake and weight gain in preterm infants. Our process evaluation  
40  
41 340 demonstrates that using NPT to develop and guide the implementation process can lead to high  
42  
43 341 compliance with guidelines and changes in practice that are sustained beyond the initial intervention  
44  
45 342 period. The results also show that measures of normalisation using the NPT toolkit correlate well with  
46  
47 343 measures of clinical practice in real life, and suggest that NPT may therefore offer an effective way of  
48  
49 344 measuring and guiding the implementation process. Effectively implementing the components of this  
50  
51 345 intervention significantly improved both protein intake and weight gain, and appeared to prevent the  
52  
53 346 'expected' fall of around 1.5-2 SDS for weight between birth and discharge reported in other studies [21,  
54  
55  
56  
57  
58  
59  
60

1  
2  
3 347 22]. This may be clinically relevant; for example, it may lead to improved neurodevelopmental outcomes  
4  
5 348 [23-25] and so follow up of the infants in this study will be important. Improvement in weight gain and  
6  
7  
8 349 protein intake appears to continue into the post implementation period, suggesting that improvements  
9  
10 350 were sustained beyond the main intervention period. It is of interest however, that despite the  
11  
12 351 improvements seen, infants did still fall 0.39 standard deviations for weight between birth and  
13  
14  
15 352 discharge. Whilst such a fall may be considered normal fluctuation around a centile line, it is relevant  
16  
17 353 that even the end of the study infants still only received around 3.34g/kg/day of protein (86.8% of RRI)  
18  
19 354 on average across stay, so were still not receiving recommended amounts of protein. This may explain  
20  
21 355 why they still displayed some negative growth. Suboptimal intake of other nutrients such as electrolytes,  
22  
23 356 vitamins and trace elements may also have contributed. Similarly, this may also have contributed to the  
24  
25  
26 357 lack of significant improvements in head growth, although this may in part have been due to poor  
27  
28 358 collection of head circumference data in the earlier phases of the study (as staff did not begin measuring  
29  
30 359 it consistently until the first intervention period) meaning there were insufficient numbers for a  
31  
32  
33 360 statistically significant result despite a trend towards improvement across the study.

34  
35  
36 361 In the present study, audits of guideline compliance were used in combination with the NPT toolkit. The  
37  
38 362 audits measured how well the guideline was put into practice, and the toolkit provided insight into how  
39  
40 363 well the intervention was being integrated into routine care by staff and identified areas where more  
41  
42 364 work was needed to aid implementation. NPT was used prospectively for the first time in this study to  
43  
44 365 develop and drive the intervention, rather than retrospectively assessing the implementation process. In  
45  
46 366 particular, the guidelines were aimed at encouraging *coherence* and *cognitive participation* by being  
47  
48 367 clear about the reasoning behind the approaches used and how to use them. Similarly, the nutrition  
49  
50 368 team, nurse champions and nutrition ward round aimed to provide feedback to aid *reflexive monitoring*.  
51  
52 369 Audit compliance generally improved over the course of the intervention period, and was around 80%,  
53  
54  
55  
56  
57  
58  
59  
60



1  
2  
3 370 which is exceptionally high for studies of implementation. NPT scores generally increased over time,  
4  
5 371 suggesting the intervention was becoming 'normalised' into practice. While the use of the NPT Toolkit to  
6  
7 372 measure normalisation in this study was novel and experimental, it seems that the measure of  
8  
9  
10 373 'normalisation' provided by the NPT toolkit does relate to practice changes in the 'real world'. Here,  
11  
12 374 subjective self-reports by staff related well to objective measures of guideline compliance. Global NPT  
13  
14 375 scores were high even at the start of the intervention, suggesting that staff felt the intervention became  
15  
16 376 embedded into routine care rapidly. Importantly, in this study, the use of NPT provided a framework to  
17  
18 377 think through the implementation process, with the NPT toolkit measures allowing the implementing  
19  
20 378 team to see where the implementation process could be improved by highlighting how to better engage  
21  
22 379 staff or alter the intervention in areas where NPT scores were low. This unique way of driving,  
23  
24 380 measuring and adjusting the intervention to enhance uptake meant that the use of NPT in this study  
25  
26 381 contributed to the success of the intervention.  
27  
28  
29  
30

31  
32 382 A notable result of this study is the importance of reflexive monitoring of implementation progress by  
33  
34 383 staff. This was significantly associated with audit compliance ( $r = 0.25$ ). However, it accounted for 6% of  
35  
36 384 the variation in audit compliance and it had an effect size of an improvement of 0.9% audit compliance  
37  
38 385 for every point in global NPT scores. Seeing the impact of personal action functions as a feedback  
39  
40 386 mechanism, and such 'feedback loops' are likely to be responsible for the efficacy of professional  
41  
42 387 interventions such as 'audit and feedback' and 'educational outreach' from other health professionals  
43  
44 388 [10]. Both of these were central components of the intervention. These findings are also consistent with  
45  
46 389 those of a previous theory-led overview of systematic reviews of professional interventions using NPT by  
47  
48 390 our group, which showed that those interventions that emphasised *reflexive monitoring* were more  
49  
50 391 likely to be successful [10]. Showing staff the results of the study to date during the main  
51  
52 392 implementation period in response to low *reflexive monitoring* scores demonstrates the utility of NPT to  
53  
54  
55  
56  
57  
58  
59  
60

1  
2  
3 393 identify issues and make implementation a more dynamic process. It also illustrates how addressing  
4  
5 394 such issues results in responsive changes that can be seen in subsequent NPT scores, suggesting that  
6  
7  
8 395 NPT offers a way to both *measure* and *guide* change.  
9

10  
11 396 We have previously discussed the importance of context in relation to implementation, suggesting that  
12  
13 397 NPT is also able to provide a lens through which to consider the interactions between context and  
14  
15 398 complex interventions [7]. We proposed that the *plasticity* of interventions and the *elasticity* of the  
16  
17 399 context into which they were introduced played a significant part in the degree of implementation  
18  
19  
20 400 success. Using NPT in the present study to both develop and guide the implementation process, perhaps  
21  
22 401 helped overcome the issues with the complex context of the NICU, providing contemporaneous  
23  
24 402 feedback on the barriers to implementation and allowing a degree of plasticity of the intervention itself.  
25  
26  
27 403 This process was also facilitated by the focus groups prior to implementation, allowing potential barriers  
28  
29 404 to be overcome by alterations in the intervention components and the way in which they were  
30  
31 405 delivered. In addition, the focus groups suggested a desire from staff for more consistency in nutritional  
32  
33 406 care, and this in turn is likely to have improved the elasticity of the host context, facilitating *normative*  
34  
35 407 *restructuring* around the intervention and aiding implementation. This may explain the high degree of  
36  
37  
38 408 compliance and normalisation seen in the present study.  
39

40  
41  
42 409 There were some limitations to this study. As a controlled before and after study, it is not possible to be  
43  
44 410 sure if any of the changes seen during the study are a direct result of the intervention. As this was not a  
45  
46 411 randomised controlled trial, it cannot control for causal mechanisms and confounders, and as such it is  
47  
48 412 subject to limits of interpretation. Whilst the statistical analyses show associations between the  
49  
50 413 progressive implementation of the intervention and changes in outcomes, it cannot prove causation. A  
51  
52 414 further limitation relates to having adequate patient numbers and statistical power to detect important  
53  
54  
55 415 differences, which may possibly account for the failure to detect a clinically significant improvement in  
56  
57  
58  
59  
60

1  
2  
3 416 head circumference. The study was also not powered to detect differences in mortality and morbidity  
4  
5 417 data. An important limitation of the NPT toolkit questionnaires used in this study is that staff responses  
6  
7  
8 418 may have been biased by their beliefs about the expectations of the study team, which is a common  
9  
10 419 problem in such studies. In addition, the specific interventions used in this study required some  
11  
12 420 additional resources (in terms of the nutrition team) and investment by staff, which may not be  
13  
14 421 available in all units. Several studies have used single interventions such as the introduction of a dietitian  
15  
16 422 or guidelines, and shown improvements in nutrient intakes and growth, without the multifaceted and  
17  
18 423 complex process used in this study[26-28]. Whilst such simple approaches may be more straightforward  
19  
20 424 and require less resource, they are dependent on the expertise of the individuals and their ongoing  
21  
22 425 availability. Our approach employing multiple methods and using sociological theory (NPT) to tailor the  
23  
24 426 intervention to the specific context aimed to embed the changes in nutritional practice into routine  
25  
26 427 care. This enabled it to account for locally available resources, and other units could use a similar  
27  
28 428 approach to develop a multifaceted intervention based on their resources and needs.  
29  
30  
31  
32  
33  
34  
35  
36

429

## 430 **CONCLUSION**

431 This study used nutrition in the NICU as a vehicle to understand implementation in a complex  
432 environment. It has demonstrated that the implementation of the facilitated guideline was associated  
433 with improvements in infant protein intakes and weight. The use of NPT to guide and monitor the  
434 implementation of the intervention resulted in high guideline compliance and a degree of  
435 'normalisation' of the complex intervention into routine care. Measures of normalisation using NPT  
436 appear to relate to objective measures of practice, suggesting that NPT could provide a useful way of  
437 understanding the dynamics of implementation processes in complex clinical environments.

1  
2  
3  
4  
5  
6  
7  
8  
9  
10  
11  
12  
13  
14  
15  
16  
17  
18  
19  
20  
21  
22  
23  
24  
25  
26  
27  
28  
29  
30  
31  
32  
33  
34  
35  
36  
37  
38  
39  
40  
41  
42  
43  
44  
45  
46  
47  
48  
49  
50  
51  
52  
53  
54  
55  
56  
57  
58  
59  
60

438

For peer review only

1  
2  
3 439 **LIST OF ABBREVIATIONS:**  
4  
5

6  
7 440 ALP – Alkaline Phosphatase; ESPGHAN - European Society for Pediatric Gastroenterology; Hepatology  
8  
9 441 and Nutrition; NICU - Neonatal Intensive Care Unit; NPT – Normalization Process Theory; PN –  
10  
11 442 Parenteral Nutrition; RNI – Reference Nutrient Intake; RRI – Reasonable Range of Intake; WHO – World  
12  
13 443 Health Organisation.  
14  
15

16  
17 444  
18  
19

20  
21 445 **DECLARATIONS**  
22

23  
24 446 *Ethics approval and consent to participate*  
25

26  
27 447 The study was approved by an NHS Research Ethics Committee, ('Oxford 'B' Reference 11/sc/0365)  
28  
29

30 448 *Consent for publication*  
31

32  
33 449 Not applicable  
34  
35

36 450 *Availability of data and material*  
37

38  
39 451 The datasets generated and/or analysed during the current study are not publicly available due to  
40  
41 452 further pending publications and current approvals, but may be available from the corresponding author  
42  
43 453 on reasonable request. An implementation toolkit and a validated instrument to measure  
44  
45 454 implementation processes using Normalisation Process Theory are available at  
46  
47 455 [www.normalizationprocess.org](http://www.normalizationprocess.org).  
48  
49

50  
51  
52 456 *Competing interests*  
53  
54  
55  
56  
57  
58  
59  
60

1  
2  
3 457 All authors have completed the ICMJE uniform disclosure form at [www.icmje.org/coi\\_disclosure.pdf](http://www.icmje.org/coi_disclosure.pdf) and  
4  
5 458 declare: no support from any organisation for the submitted work; CRM is an original author of  
6  
7  
8 459 Normalization Process Theory; no other relationships or activities that could appear to have influenced  
9  
10 460 the submitted work.

11  
12  
13 461 *Funding*

14  
15  
16 462 Work leading to this paper was funded by the National Institute for Health Research (NIHR) Biomedical  
17  
18 463 Research Centre, Southampton. MJ's contribution was partly supported by an NIHR Doctoral Research  
19  
20 464 Fellowship DRF-2012-05-272, and CRM's contribution was partly supported by NIHR CLAHRC Wessex  
21  
22 465 and partly by ESRC Grant ES-062-23-3274. We gratefully acknowledge the financial support from these  
23  
24 466 agencies. Funders had no role in the design of the study and collection, analysis and interpretation of  
25  
26 467 the data or in writing the manuscript, and the paper does not necessarily represent their views.

27  
28  
29  
30  
31 468 *Authors' contributions*

32  
33  
34 469 MJJ contributed to the design of the study, carried out data analysis and interpreted all data. He was  
35  
36 470 responsible for drafting the article and revising it critically for important intellectual content. He is  
37  
38 471 guarantor. AAL, FP, HWC contributed to the conception and design of the study and interpretation of  
39  
40 472 data. They revised the article critically for important intellectual content. BDD supervised the statistical  
41  
42 473 analysis and developed the statistical model used for longitudinal data analysis. He contributed to the  
43  
44 474 interpretation of data and revised the article critically for important intellectual content. CJP and CRM  
45  
46 475 contributed to the design of the study, the use of NPT in the study and interpretation of data. They  
47  
48 476 revised the article critically for important intellectual content.

49  
50  
51  
52  
53 477 *Acknowledgements*

1  
2  
3 478 We would like to further acknowledge the work of Amanda Beedham and Karen Hayllar at Co.Efficient  
4  
5 479 Consultancy, who provided expertise in the development phase and were contracted to develop and  
6  
7  
8 480 build the electronic tool for calculating and storing daily nutrient intake and growth data. We would also  
9  
10 481 like to acknowledge Miss Zoe Lansdowne and Dr Amanda Bevan (Neonatal and Paediatric Pharmacists,  
11  
12 482 University Hospital Southampton NHS Foundation Trust) for their help with the parenteral nutrition  
13  
14 483 solution data used in the electronic tool.

15  
16  
17  
18 484 We would also like to acknowledge Jenny Pond, Jane Rhodes-Kitson, Charlotte Oates, Jenny Weddell  
19  
20 485 and, Linda Anderson, Christina Humphrey and Liz Blake for their help in data collection and in their roles  
21  
22 486 as nurse 'Champions for Nutrition'.

23  
24  
25  
26 487 Finally, we would like to dedicate this paper to Borislav D. Dimitrov, who sadly passed away during the  
27  
28 488 publication of this work.

29  
30  
31 489

## 32 33 490 **FIGURE TITLES AND LEGENDS**

### 34 35 36 491 **Figure 1: The Model of Normalization Process Theory**

37 492 The four main constructs of NPT are shown in bold. Reproduced with permission [8]

### 38 39 493 **Figure 2: Study process flow chart**

### 40 41 494 **Figure 3: Bar graphs showing mean daily nutrient intakes across the four study periods**

42  
43 495 Bars show mean daily Energy in kcal/kg/day (A), protein in g/kg/day (B), energy as a percentage of RRI  
44 496 (C) and protein as a percentage of RRI (D). Error bars represent 95% confidence intervals. Blue bars  
45 497 represent unadjusted data, while red bars are adjusted for sex, gestational age and weight at birth.

46  
47 498 \* $p < 0.05$  for difference vs period A, † $p < 0.05$  for difference vs period B, + $p < 0.05$  for difference vs period  
48 499 C. (RRI- reasonable range of intake)

### 49 50 500 **Figure 4: Bar graphs showing mean change in standard deviation score (SDS) across the four study** 51 501 **periods**

52  
53 502 Changes are from birth until discharge for weight (A) and head circumference (B). Error bars represent  
54 503 95% confidence intervals. Blue bars represent unadjusted data, whilst red bars are adjusted for sex,

55 504 gestational age and weight at birth \* $p < 0.05$  for difference vs period A, † $p < 0.05$  for difference vs period  
56 505 B, + $p < 0.05$  for difference vs period C

1  
2  
3  
4  
5  
6  
7  
8  
9  
10  
11  
12  
13  
14  
15  
16  
17  
18  
19  
20  
21  
22  
23  
24  
25  
26  
27  
28  
29  
30  
31  
32  
33  
34  
35  
36  
37  
38  
39  
40  
41  
42  
43  
44  
45  
46  
47  
48  
49  
50  
51  
52  
53  
54  
55  
56  
57  
58  
59  
60

506 **Figure 5: Radar plots showing the mean score for each sub-construct of NPT**

507 Results from the NPT questionnaire taken throughout the course of the study.

508 **Figure 6: Relationship over time between mean NPT scores and percentage guideline compliance**

509

510 **ADDITIONAL FILES**

511 Additional File 1.pdf: Nutrition guideline used in this study

512 Additional File 2.pdf: Data tables to accompany Figure 3 (mean daily nutrient intakes across stay) and

513 Figure 4 (growth over stay)

514

For peer review only



## 515 REFERENCES

- 516 1. Grimshaw JM, Eccles MP, Lavis JN, et al. Knowledge translation of research findings. *Implement Sci*  
517 2012;**7**:50 doi: 10.1186/1748-5908-7-50  
518 1748-5908-7-50 [pii][published Online First: Epub Date]|.
- 519 2. Eccles M, Mittman B. Welcome to Implementation Science. *Implementation Science* 2006;**1**(1):1 doi:  
520 10.1186/1748-5908-1-1[published Online First: Epub Date]|.
- 521 3. Tsang RC. *Nutrition of the preterm infant*. 2nd ed. ed. Cincinnati: Digital Educational Publishing, 2005.
- 522 4. Agostoni C, Buonocore G, Carnielli VP, et al. Enteral nutrient supply for preterm infants: commentary  
523 from the European Society of Paediatric Gastroenterology, Hepatology and Nutrition Committee  
524 on Nutrition. *J Pediatr Gastroenterol Nutr* 2010;**50**(1):85-91 doi:  
525 10.1097/MPG.0b013e3181adaee0[published Online First: Epub Date]|.
- 526 5. Embleton NE, Pang N, Cooke RJ. Postnatal malnutrition and growth retardation: an inevitable  
527 consequence of current recommendations in preterm infants? *Pediatrics* 2001;**107**(2):270-3  
528 6. Cooke RJ, Ainsworth SB, Fenton AC. Postnatal growth retardation: a universal problem in preterm  
529 infants. *Arch Dis Child Fetal Neonatal Ed* 2004;**89**(5):F428-30 doi: 10.1136/adc.2001.004044  
530 89/5/F428 [pii][published Online First: Epub Date]|.
- 531 7. May CR, Johnson M, Finch T. Implementation, context and complexity. *Implement Sci* 2016;**11**(1):141  
532 doi: 10.1186/s13012-016-0506-3  
533 10.1186/s13012-016-0506-3 [pii][published Online First: Epub Date]|.
- 534 8. May C, Finch T. Implementing, Embedding, and Integrating Practices: An Outline of Normalization  
535 Process Theory. *Sociology* 2009;**43**(3):535-54 doi: 10.1177/0038038509103208[published Online  
536 First: Epub Date]|.
- 537 9. May CR, Mair F, Finch T, et al. Development of a theory of implementation and integration:  
538 Normalization Process Theory. *Implementation Science* 2009;**4**(1):29 doi: 10.1186/1748-5908-4-  
539 29[published Online First: Epub Date]|.
- 540 10. Johnson MJ, May CR. Promoting professional behaviour change in healthcare: what interventions  
541 work, and why? A theory-led overview of systematic reviews. *BMJ Open* 2015;**5**(9):e008592 doi:  
542 10.1136/bmjopen-2015-008592  
543 bmjopen-2015-008592 [pii][published Online First: Epub Date]|.
- 544 11. Craig P, Dieppe P, Macintyre S, et al. *Developing and Evaluating Complex Interventions: New*  
545 *Guidance: Medical Research Council*, 2008.
- 546 12. Tabak RG, Khoong EC, Chambers DA, et al. Bridging research and practice: models for dissemination  
547 and implementation research. *Am J Prev Med* 2012;**43**(3):337-50 doi:  
548 10.1016/j.amepre.2012.05.024  
549 S0749-3797(12)00389-3 [pii][published Online First: Epub Date]|.
- 550 13. Murray E, Treweek S, Pope C, et al. Normalisation process theory: a framework for developing,  
551 evaluating and implementing complex interventions. *BMC medicine* 2010;**8**:63 doi:  
552 10.1186/1741-7015-8-63[published Online First: Epub Date]|.
- 553 14. Johnson MJ, Pearson F, Emm A, et al. Developing a new screening tool for nutritional risk in neonatal  
554 intensive care. *Acta Paediatr* 2015;**104**(2):e90-3 doi: 10.1111/apa.12855[published Online First:  
555 Epub Date]|.

- 1  
2  
3 556 15. Westbury JA, Johnson MJ, Pond JP, et al. Developing the role of the nurse as a link advisor for  
4 557 research and a champion for nutrition in the neonatal intensive care unit. *Journal of Neonatal*  
5 558 *Nursing* 2013;**19**:198 doi: <http://dx.doi.org/10.1016/j.jnn.2013.01.003>[published Online First:  
6 559 Epub Date]].
- 7  
8 560 16. Koletzko B, Poindexter B, Uauy R. *Nutritional care of preterm infants : scientific basis and practical*  
9 561 *guidelines*. Basel: S. Karger AG, 2014.
- 10 562 17. Lee L, Girish S, van den Berg E, et al. Random safety audits in the neonatal unit. *Arch Dis Child Fetal*  
11 563 *Neonatal Ed* 2009;**94**(2):F116-9 doi: [adc.2007.131052](https://doi.org/10.1136/adc.2007.131052) [pii]  
12 564 [10.1136/adc.2007.131052](https://doi.org/10.1136/adc.2007.131052)[published Online First: Epub Date]].
- 13  
14 565 18. Parry G, Tucker J, Tarnow-Mordi W. CRIB II: an update of the clinical risk index for babies score.  
15 566 *Lancet* 2003;**361**(9371):1789-91 doi: [S0140-6736\(03\)13397-1](https://doi.org/10.1016/S0140-6736(03)13397-1) [pii]  
16 567 [10.1016/S0140-6736\(03\)13397-1](https://doi.org/10.1016/S0140-6736(03)13397-1)[published Online First: Epub Date]].
- 17  
18 568 19. Rochow N, Fusch G, Muhlinghaus A, et al. A nutritional program to improve outcome of very low  
19 569 birth weight infants. *Clin Nutr* 2012;**31**(1):124-31 doi: [10.1016/j.clnu.2011.07.004](https://doi.org/10.1016/j.clnu.2011.07.004)  
20 570 [S0261-5614\(11\)00131-2](https://doi.org/10.1016/j.clnu.2011.07.004) [pii][published Online First: Epub Date]].
- 21  
22 571 20. Roggero P, Gianni ML, Orsi A, et al. Implementation of nutritional strategies decreases postnatal  
23 572 growth restriction in preterm infants. *PLoS One* 2012;**7**(12):e51166 doi:  
24 573 [10.1371/journal.pone.0051166](https://doi.org/10.1371/journal.pone.0051166)  
25 574 [PONE-D-12-22771](https://doi.org/10.1371/journal.pone.0051166) [pii][published Online First: Epub Date]].
- 26  
27 575 21. Ehrenkranz RA, Younes N, Lemons JA, et al. Longitudinal growth of hospitalized very low birth weight  
28 576 infants. *Pediatrics* 1999;**104**(2 Pt 1):280-9  
29 577 22. Cole TJ, Statnikov Y, Santhakumaran S, et al. Birth weight and longitudinal growth in infants born  
30 578 below 32 weeks' gestation: a UK population study. *Arch Dis Child Fetal Neonatal Ed* 2013 doi:  
31 579 [10.1136/archdischild-2012-303536](https://doi.org/10.1136/archdischild-2012-303536)  
32 580 [archdischild-2012-303536](https://doi.org/10.1136/archdischild-2012-303536) [pii][published Online First: Epub Date]].
- 33  
34 581 23. Ehrenkranz RA, Dusick AM, Vohr BR, et al. Growth in the neonatal intensive care unit influences  
35 582 neurodevelopmental and growth outcomes of extremely low birth weight infants. *Pediatrics*  
36 583 2006;**117**(4):1253-61 doi: [117/4/1253](https://doi.org/10.1542/peds.2005-1368) [pii]  
37 584 [10.1542/peds.2005-1368](https://doi.org/10.1542/peds.2005-1368)[published Online First: Epub Date]].
- 38  
39 585 24. Stephens BE, Walden RV, Gargus RA, et al. First-week protein and energy intakes are associated with  
40 586 18-month developmental outcomes in extremely low birth weight infants. *Pediatrics*  
41 587 2009;**123**(5):1337-43 doi: [123/5/1337](https://doi.org/10.1542/peds.2008-0211) [pii]  
42 588 [10.1542/peds.2008-0211](https://doi.org/10.1542/peds.2008-0211)[published Online First: Epub Date]].
- 43  
44 589 25. Chan SH, Johnson MJ, Leaf AA, et al. Nutrition and neurodevelopmental outcomes in preterm  
45 590 infants: a systematic review. *Acta Paediatr* 2016;**105**(6):587-99 doi:  
46 591 [10.1111/apa.13344](https://doi.org/10.1111/apa.13344)[published Online First: Epub Date]].
- 47  
48 592 26. Donovan R, Puppala B, Angst D, et al. Outcomes of early nutrition support in extremely low-birth-  
49 593 weight infants. *Nutr Clin Pract* 2006;**21**(4):395-400 doi: [21/4/395](https://doi.org/10.1177/0885066606289111) [pii][published Online First:  
50 594 Epub Date]].
- 51  
52 595 27. Sneve J, Kattelman K, Ren C, et al. Implementation of a multidisciplinary team that includes a  
53 596 registered dietitian in a neonatal intensive care unit improved nutrition outcomes. *Nutr Clin*  
54 597 *Pract* 2008;**23**(6):630-4 doi: [23/6/630](https://doi.org/10.1177/0885066608316111) [pii]

1  
2  
3 598 10.1177/0884533608326140[published Online First: Epub Date] |.  
4 599 28. Olsen IE, Richardson DK, Schmid CH, et al. Dietitian involvement in the neonatal intensive care unit:  
5 600 more is better. J Am Diet Assoc 2005;**105**(8):1224-30 doi: S0002-8223(05)00645-0 [pii]

6  
7 601 10.1016/j.jada.2005.05.012[published Online First: Epub Date] |.  
8  
9 602  
10  
11 603  
12  
13  
14  
15 604  
16  
17  
18  
19  
20  
21  
22  
23  
24  
25  
26  
27  
28  
29  
30  
31  
32  
33  
34  
35  
36  
37  
38  
39  
40  
41  
42  
43  
44  
45  
46  
47  
48  
49  
50  
51  
52  
53  
54  
55  
56  
57  
58  
59  
60

For peer review only

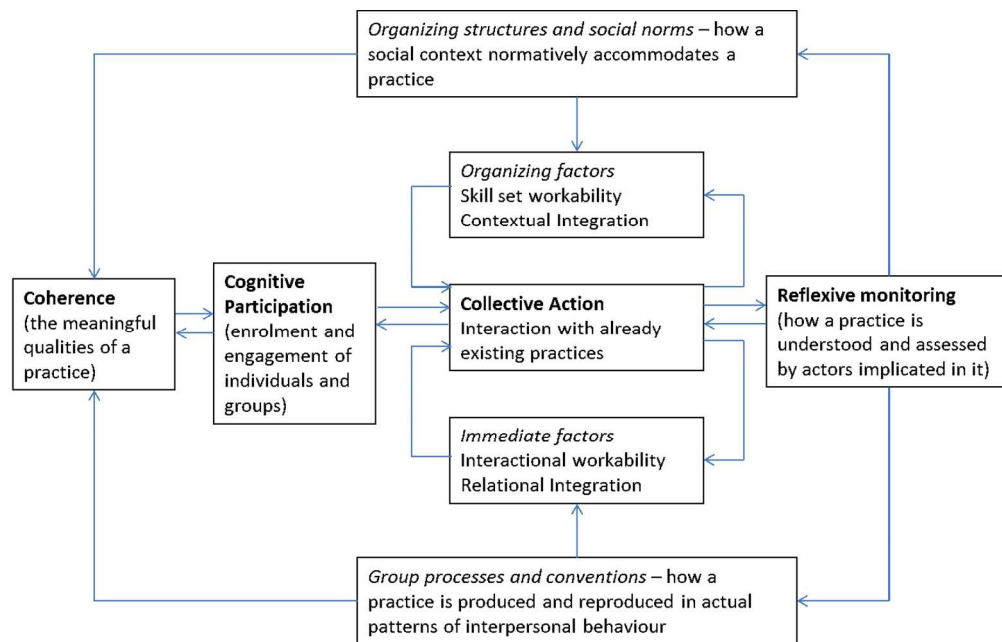

Figure 1: The Model of Normalization Process Theory  
The four main constructs of NPT are shown in bold. Reproduced with permission [8]

119x76mm (300 x 300 DPI)

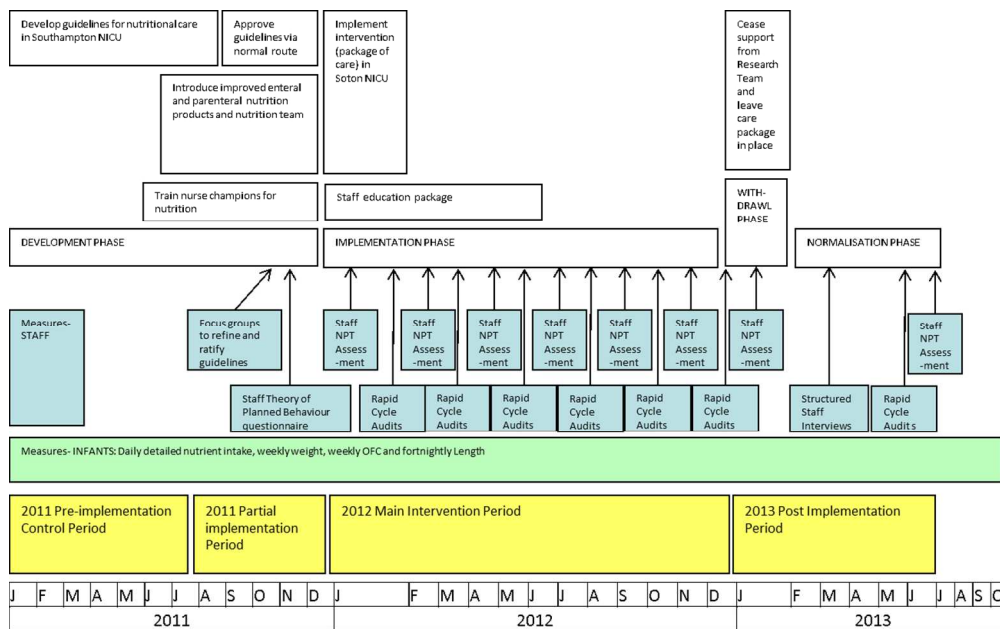

Figure 2: Study process flow chart

110x69mm (300 x 300 DPI)



Figure 3: Bar graphs showing mean daily nutrient intakes across the four study periods. Bars show mean daily Energy in kcal/kg/day (A), protein in g/kg/day (B), energy as a percentage of RRI (C) and protein as a percentage of RRI (D). Error bars represent 95% confidence intervals. Blue bars represent unadjusted data, while red bars are adjusted for sex, gestational age and weight at birth. \* $p < 0.05$  for difference vs period A, † $p < 0.05$  for difference vs period B, †† $p < 0.05$  for difference vs period C. (RRI=reasonable range of intake)

370x196mm (300 x 300 DPI)

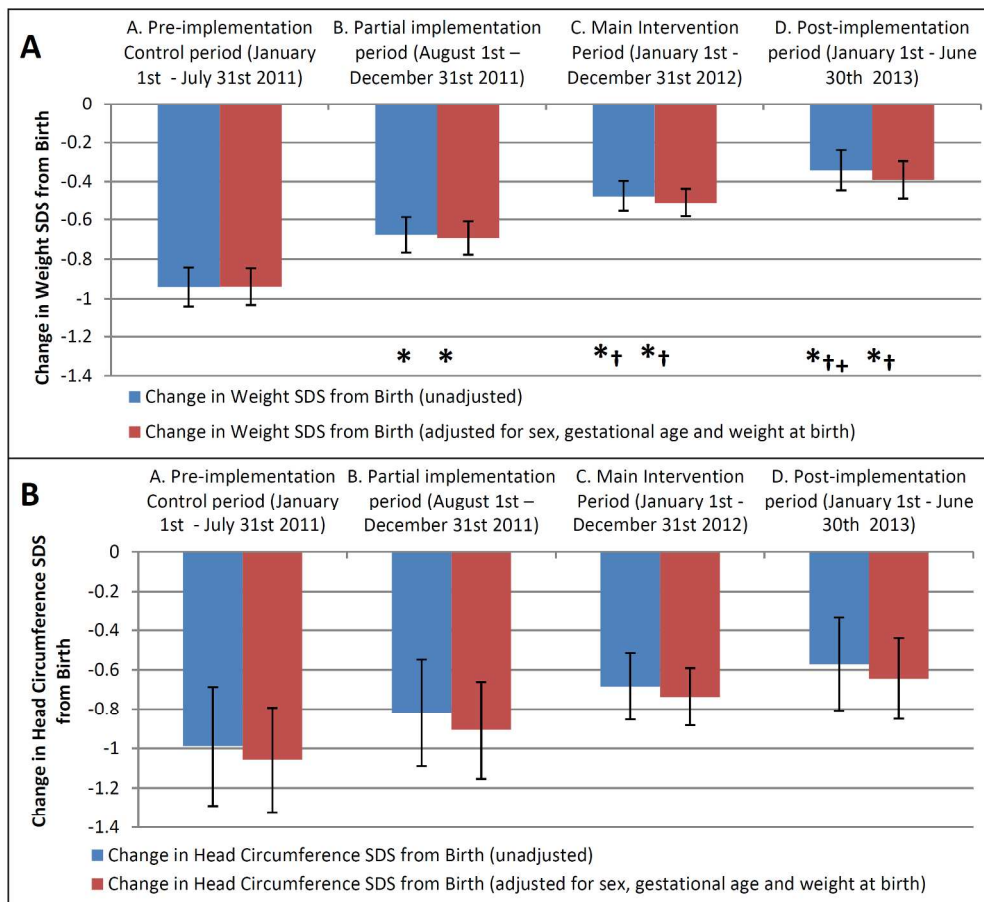

Figure 4: Bar graphs showing mean change in standard deviation score (SDS) across the four study periods. Changes are from birth until discharge for weight (A) and head circumference (B). Error bars represent 95% confidence intervals. Blue bars represent unadjusted data, whilst red bars are adjusted for sex, gestational age and weight at birth \* $p < 0.05$  for difference vs period A, † $p < 0.05$  for difference vs period B, †† $p < 0.05$  for difference vs period C

236x215mm (300 x 300 DPI)

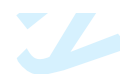

1  
2  
3  
4  
5  
6  
7  
8  
9  
10  
11  
12  
13  
14  
15  
16  
17  
18  
19  
20  
21  
22  
23  
24  
25  
26  
27  
28  
29  
30  
31  
32  
33  
34  
35  
36  
37  
38  
39  
40  
41  
42  
43  
44  
45  
46  
47  
48  
49  
50  
51  
52  
53  
54  
55  
56  
57  
58  
59  
60

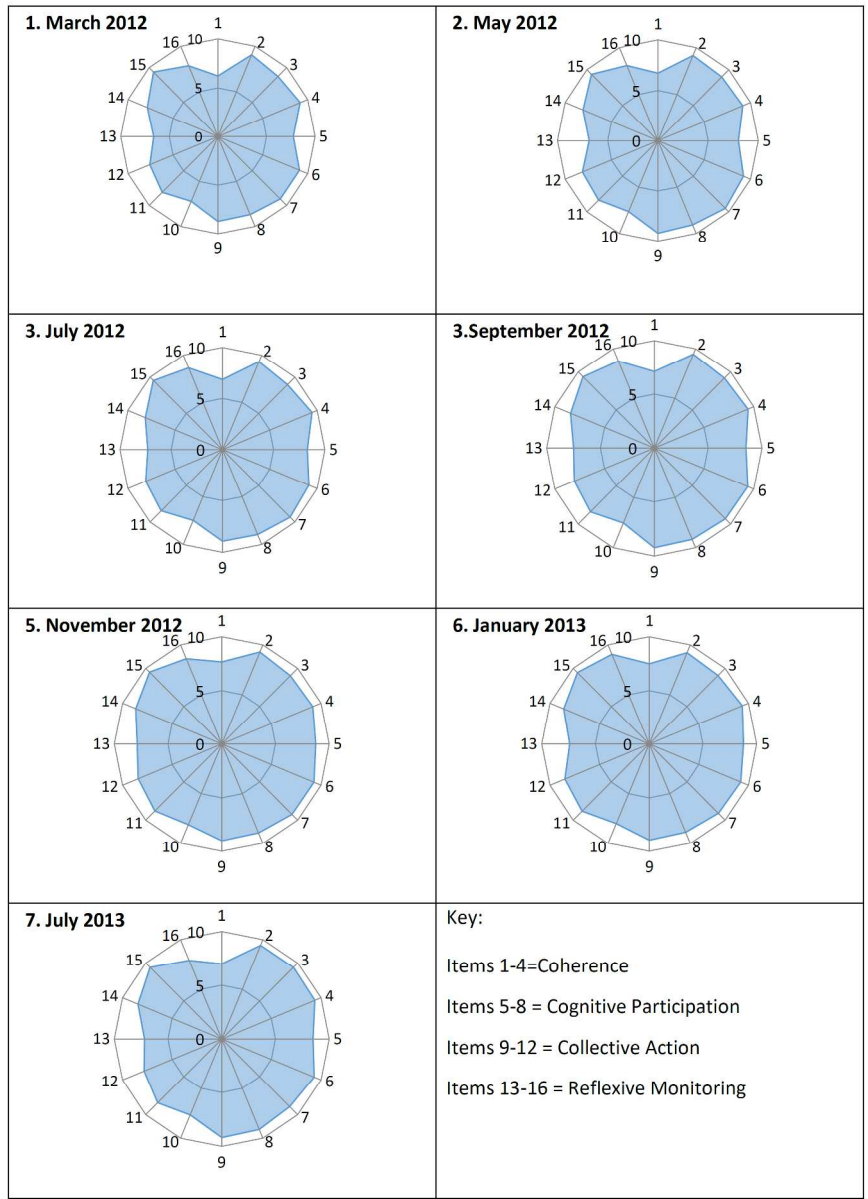

Figure 5: Radar plots showing the mean score for each sub-construct of NPT Results from the NPT questionnaire taken throughout the course of the study.

239x332mm (300 x 300 DPI)



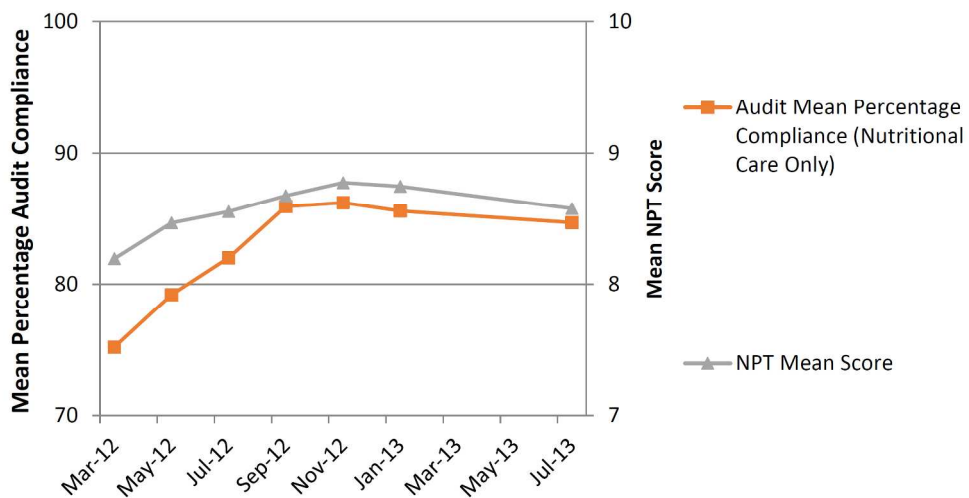

Figure 6: Relationship over time between mean NPT scores and percentage guideline compliance

224x117mm (300 x 300 DPI)

review only

1  
2  
3  
4  
5  
6  
7  
8  
9  
10  
11  
12  
13  
14  
15  
16  
17  
18  
19  
20  
21  
22  
23  
24  
25  
26  
27  
28  
29  
30  
31  
32  
33  
34  
35  
36  
37  
38  
39  
40  
41  
42  
43  
44  
45  
46  
47  
48  
49  
50  
51  
52  
53  
54  
55  
56  
57  
58  
59  
60

1  
2  
3  
4  
5  
6  
7  
8  
9  
10  
11  
12  
13  
14  
15  
16  
17  
18  
19  
20  
21  
22  
23  
24  
25  
26  
27  
28  
29  
30  
31  
32  
33  
34  
35  
36  
37  
38  
39  
40  
41  
42  
43  
44  
45  
46  
47  
48  
49  
50  
51  
52  
53  
54  
55  
56  
57  
58  
59  
60

# Guidelines for the Nutritional Care of Infants in the Neonatal Unit

**Version: 1.0**

**Issued: December 2011**

**Review date: December 2014**

**Author: Dr Alison Leaf**

The procedural aspects of this guideline can be found in the document entitled:-

Guideline Proforma - **Guidelines for the Nutritional Care of Infants in the Neonatal Unit**

## Contents

| Paragraph         |                                                                                       | Page |
|-------------------|---------------------------------------------------------------------------------------|------|
|                   | <b>Executive Summary</b>                                                              | 3    |
| 1.                | Introduction                                                                          | 4    |
| 2.                | Definitions                                                                           | 5    |
| 3.                | Roles and Responsibilities                                                            | 6    |
| 4.                | Related Trust Documents                                                               | 7    |
| 5.                | Guideline                                                                             |      |
|                   | <b>1. Aims and objectives; audit points</b>                                           | 8    |
|                   | <b>2. Assessment and monitoring</b>                                                   |      |
|                   | i. Initial assessment: growth / risk category / screen                                | 9    |
|                   | ii. On-going assessment: growth / biochemistry / nutrition screening / nutrition team | 10   |
|                   | <b>3. Nutrient requirements</b>                                                       | 11   |
|                   | <b>4. Standard nutritional support of preterm and sick infants</b>                    | 12   |
|                   | a. Overview by risk group                                                             | 12   |
|                   | b. Parenteral nutrition                                                               | 13   |
|                   | i. Indications for PN                                                                 | 13   |
|                   | ii. Starting PN                                                                       | 13   |
|                   | iii. Stock PN solutions                                                               | 13   |
|                   | iv. Pharmacy-manufactured ('bespoke') PN                                              | 13   |
|                   | v. Reducing PN as feeds increase                                                      | 14   |
|                   | vi. Peripheral PN                                                                     | 14   |
|                   | vii. Cautions                                                                         | 14   |
|                   | c. Enteral nutrition                                                                  | 15   |
|                   | i. Starting feeds                                                                     | 15   |
|                   | ii. Choice of milk                                                                    | 15   |
|                   | iii. Advancing feeds                                                                  | 15   |
|                   | iv. Routine nutritional supplements                                                   | 16   |
|                   | v. Nutrition at discharge                                                             | 16   |
|                   | <b>5. Management of common gut and feeding problems</b>                               | 17   |
|                   | a. Feed intolerance / gastric residuals                                               | 17   |
|                   | b. Abdominal distension                                                               | 17   |
|                   | c. Suspected Necrotising Enterocolitis (NEC)                                          | 17   |
|                   | d. Suspected Gastro-oesophageal reflux (GOR)                                          | 17   |
|                   | e. Suspected Food Protein Intolerance                                                 | 17   |
|                   | <b>6. Management of babies with surgical bowel problems</b>                           | 18   |
|                   | <b>7. Flow Charts</b>                                                                 | 20   |
|                   | a. Starting and Increasing Feeds – High Risk Infants                                  | 20   |
|                   | b. Starting and Increasing Feeds – Moderate Risk Infants                              | 21   |
|                   | c. Management of common feed related problems                                         | 22   |
|                   | d. Choice of milk                                                                     | 23   |
|                   | <b>8. Tables</b>                                                                      | 24   |
|                   | a. Starting and increasing feeds                                                      | 24   |
|                   | b. Nutrient content of commonly used products                                         | 25   |
|                   | <b>9. Supporting Information</b>                                                      | 26   |
| 6.                | References                                                                            | 32   |
| <b>Appendices</b> |                                                                                       |      |
| Appendix 1        | Nutrient Requirements of preterm infants                                              | 35   |
| Appendix 2        | Neonatal Nutrition Screening Tool                                                     | 36   |

## Executive Summary

Good nutrition is important at all stages of life. Babies are born at a time of rapid growth and formation of body tissues and organs, yet immature metabolism means they are unable to cope with either excess or lack of nutrients. Detail in both the quantity and quality of nutrients is critically important.

There is good evidence that mother's breast milk confers many advantages to baby, mother and to the formation of the parental bond. As well as containing just the right nutrients for human development, breast milk contains many factors which promote immune function and enable healthy intestinal development. Breast milk and breast-feeding should be encouraged in almost all situations.

Preterm infants and those with congenital abnormalities or metabolic disorders may require nutrient supplements or special feeds, and may require a period of intravenous nutrition until the gut is able to support their needs.

Measuring growth and monitoring biochemical well-being is crucial to optimising nutrition in high risk individuals.

These guidelines aim to provide both practical and theoretical guidance for the optimal nutrition of sick and preterm infants in the NNU at Southampton.

## 1. Introduction

- Good early growth is essential for long term health and well-being of all babies.
- Achieving recommended nutrient intake in very low birth-weight and sick infants is difficult particularly in the first weeks of life and development of a significant nutrient deficit is common. It is then very difficult to 'catch up'.
- Protein intake is particularly difficult to achieve.
- These guidelines aim to support decision-making such that nutrient delivery can be optimised. Close monitoring of intakes, biochemical status and growth is essential to monitor how well this is achieved.
- ***Every feed and every day is important – being aware of daily intake of key nutrients is the first step to improving growth and development***
- SENNAT (Southampton Electronic Neonatal Nutrition Assessment Tool) has been developed to help us all measure and monitor nutrient intakes and growth

### These guidelines are based on recommendations of:

- Enteral nutrient supply for preterm infants: commentary from the European Society of Paediatric Gastroenterology, Journal of Pediatric Gastroenterology and Nutrition 2010[1]
- Nutrition of the Preterm Infant: Scientific basis and Practical Guidelines (second edition). Tsang RC, Uauy R, Koletzko B, Zlotkin S. Digital Educational Publishing 2005[2]
- Guidelines on Paediatric Parenteral Nutrition of the European Society of Paediatric Gastroenterology, Hepatology and Nutrition (ESPGHAN) and the European Society for Clinical Nutrition and Metabolism (ESPEN), Supported by the European Society of Paediatric Research (ESPR), Journal of Pediatric Gastroenterology and Nutrition 2005[3]
- Vermont Oxford Network 'Potentially Better Practices (PBPs) for Nutrition' as laid out in Pediatrics, 2003[4]
- Management and support of infant feeding in maternity facilities. Infant and young child feeding : model chapter for textbooks for medical students and allied health professionals., World Health Organisation 2009[5]
- Optimal feeding of low-birth-weight infants, World Health Organisation, 2006[6]
- UNICEF Baby Friendly Initiative, <http://www.unicef.org.uk/babyfriendly>

## 2. Definitions

|       |                                                                                      |
|-------|--------------------------------------------------------------------------------------|
| AREDF | Absent or Reversed End Diastolic Flow (in umbilical artery, seen on antenatal scans) |
| AXR   | Abdominal X-Ray                                                                      |
| BMF   | Breast Milk Fortifier                                                                |
| CPAP  | Continuous Positive Airways Pressure                                                 |
| D/C   | Discharge                                                                            |
| DBM   | Donor Breast Milk                                                                    |
| DH    | Department of Health                                                                 |
| ELBW  | Extremely Low Birth Weight (birth weight <1000g)                                     |
| FBC   | Full Blood Count                                                                     |
| g     | grams                                                                                |
| IU    | International Units                                                                  |
| IUGR  | Intrauterine Growth Restriction                                                      |
| IV    | Intravenous                                                                          |
| kcal  | kilocalories                                                                         |
| kg    | kilogram                                                                             |
| LBW   | Low Birth Weight (birth weight <2500g)                                               |
| LFT   | Liver Function Tests                                                                 |
| MBM   | Maternal Breast Milk                                                                 |
| mg    | milligram                                                                            |
| ml    | millilitre                                                                           |
| mmol  | millimole                                                                            |
| NBM   | Nil By Mouth                                                                         |
| NEC   | Necrotising Enterocolitis                                                            |
| NICU  | Neonatal Intensive Care Unit                                                         |
| NNU   | Neonatal Unit                                                                        |
| PBP   | Potentially Better Practice                                                          |
| PDA   | Patent Ductus Arteriosus                                                             |
| PDF   | Post Discharge Formula                                                               |
| PN    | Parenteral Nutrition                                                                 |
| RCT   | Randomised Controlled Trial                                                          |
| SD    | Standard Deviation                                                                   |
| TAT   | Trans-anastamotic Tube                                                               |
| TPN   | Total Parenteral Nutrition                                                           |
| U&E   | Urea and Electrolytes                                                                |
| VLBW  | Very Low Birth Weight (birth weight <1500g)                                          |
| VON   | Vermont Oxford Network                                                               |

### 3. Roles and Responsibilities

#### BREAST-FEEDING AND LACTATION SUPPORT

- All staff: awareness of Trust Policy and NNU Guidelines
- 'Breast-feeding babes' – Lead Sandy Jackson: expert guidance for mothers breast-feeding on the post-natal wards
- NNU lactation support team – Lead Jess Macfarlane: expert guidance for mothers breast-feeding and/or expressing milk in NNU

#### PARENTERAL NUTRITION

- All staff: awareness of need for PN in high risk infants
- Nursing staff: awareness of location of 'stock' PN in NNU and knowledge and skills for PN administration appropriate to nursing skill level
- Medical staff: awareness of PN supplies available and how to prescribe; awareness of potential complications of PN and how to avoid
- Pharmacists: Amanda Bevan and Zoe Lansdowne: expertise in detailed composition of PN solutions and provision of PN in different situations on NNU

#### ENTERAL NUTRITION

- All staff: support for mothers in choice of feeding
- All staff: awareness of choices for enteral nutrition: maternal breast milk / breast-feeding; donor breast milk / milk bank; standard infant formula; formulas for preterm infants; special formulas for infants with specific gut or feeding problems
- Neonatal Dietitian (Anita Emm): expert knowledge of composition of breast milk and alternatives and guidance on making appropriate choices
- Surgical team: expert knowledge on potential feeding challenges in infants with congenital or acquired abnormalities of the gut, particularly following surgery.

#### FEEDING DIFFICULTIES

- All staff: awareness of common feeding difficulties of preterm infants and those with neurological complications
- Speech and language therapist: expert knowledge of structure and function of upper gastro- intestinal tract and how to optimise feeding potential of vulnerable babies

#### GROWTH MONITORING

- All staff: Awareness of importance of making accurate and regular measurements and plotting them on appropriate charts to monitor growth
- Nursing staff: Weigh babies at intervals as indicated by clinical condition (ideally three times per week)
- Medical and Nursing staff: Measure head circumference and length at intervals as indicated by clinical conditions (ideally head circumference at least weekly and length at least fortnightly)
- Medical and Nursing staff: Plot growth measurements on appropriate chart weekly (provided competent to do so)

#### SPECIAL CASES

- Neonatal Nutrition Team: Will review high risk or complex patients on weekly nutrition ward round

#### 4. Related Trust Documents

Donor Breast Milk Guideline (to be found at:

<http://staffnet/TrustDocsMedia/DeptDivSpecific/DivC/WomenNewborn/NeonatalUnit/NeonatalGuidelines/DonerBreastMilkGuideline/DonorBreastMilkGuideline.doc>)

Breastfeeding care pathway (on Neonatal Unit Guidelines on Unit Desktop PCs)

Vitamins and supplements guideline (on Neonatal Unit Guidelines on Unit Desktop PCs)

Parenteral Nutrition Guidebook, 4<sup>th</sup> edition (Hard copies in nurseries on Neonatal Unit)

Princess Anne Breastfeeding Policy (to be found at

<http://staffnet/TrustDocsMedia/DeptDivSpecific/DivC/WomenNewborn/Obstetrics/ObstetricClinicalGuidelines/BreastfeedingTermInfantsGuideline/BreastfeedingTermInfantsGuideline.doc>)

Neonatal Unit Breastfeeding and Formula Feeding Guideline (currently being written)

Neonatal Surgical Clinical Aids (to be found at:

<http://staffnet/Departments/DivisionC/Womenandnewborn/NeonatalServices/NeonatalSurgery/NeonatalSurgeryclinicalaids/NeonatalSurgeryclinicalaids.aspx>)

Central Venous Access Guideline (currently being written)

Naso/Orogastric Tubes in Neonates - the safe placement of: Guidelines (to be found

at:<http://staffnet/TrustDocsMedia/DeptDivSpecific/DivC/WomenNewborn/NeonatalUnit/NeonatalGuidelines/NasoOrogastricTubesinNeonates-thesafeplace/NasoOrogastricTubesinNeonates-thesafeplacementofGuidelines.DOC>)



## 5. Guideline Information

### 1. AIMS AND OBJECTIVES

- To optimise use of breast milk and breast-feeding
- To achieve recommended nutrient intakes
- To achieve postnatal growth and body composition approximating fetal growth.
- To reduce the risk of nutritional deficiency states such as late anaemia of prematurity or metabolic bone disease.
- To reduce the risk of feeding related morbidities such as NEC or cholestasis
- To optimise long term neurodevelopmental outcome.

### KEY PRINCIPLES

- All babies should be measured and have nutritional risk assessment on admission, and weekly during their stay
- Nutrition support should be started early: PN for high risk; enteral feeds for lower risk
- Mother's breast milk is the feed of first choice
- Feed tolerance should be assessed regularly and managed according to algorithms
- Protein intake should be documented and optimised in preterm infants
- High risk babies should be seen each week by the Nutrition Team
- Nutrition and feeding should be discussed in Discharge Planning and documented in the notes

### AUDIT POINTS

- Use of Nutrition Screening Tool, on all NNU admissions (100%)
- Use of growth charts on all NNU admissions (100%)
  - Weight and Head Circumference plot weekly; length plot 2-weekly
- Lactation advice and support by 6 hours for all mothers of VLBW infants
  - 100% - unless mother too ill
- Breastfeeding rates at discharge
- Protein and energy intakes as recommended by Tsang 2005
- Use of nutritional supplements according to Guidelines
- Documentation of Nutrition Plan at discharge (100%)

## 2. ASSESSMENT AND MONITORING

### (i) INITIAL ASSESSMENT

#### a. Growth Measurement

All infants should have weight, length and head circumference measured and plotted on the appropriate growth chart at admission. This information, together with other risk factors detailed below, will identify the degree of 'nutritional risk' – ie risk of becoming malnourished or developing nutrition and feeding related problems. Infants with multiple risk factors should be classified according to their highest individual risk factor. This will guide nutritional care and allow subsequent progress to be monitored.

#### b. Risk assessment – identify level of risk for nutrition and / or feeding-related problems

##### High risk

- Preterm <28 weeks
- ELBW < 1000g
- Severe IUGR (weight < 2<sup>nd</sup> centile with AREDF) <35 weeks
- Infant establishing feeds after episode of NEC or GI perforation
- Infants with severe congenital GI malformation: e.g. gastroschisis
- Severe Perinatal hypoxia / ischaemia

##### Moderate risk

- Preterm 28-31<sup>+6</sup> weeks, otherwise well
- VLBW 1000 – 1500g
- Moderate IUGR (weight < 9<sup>th</sup> centile with AREDF) <35 weeks
- Baby on inotropes
- Baby on indomethacin/ibuprofen (NB avoid concomitant treatment with steroids)
- Baby >1500g with illness or congenital anomaly which may compromise feeding
- Symptomatic polycythaemia, with PCV  $\geq$  70%

##### Low risk

- Preterm 32-36<sup>+6</sup> weeks, otherwise well
- AREDF / IUGR  $\geq$ 35 weeks
- Term Infants >37 weeks

## (ii) ON-GOING ASSESSMENT AND MONITORING

- 1  
2  
3  
4  
5  
6  
7  
8  
9  
10  
11  
12  
13  
14  
15  
16  
17  
18  
19  
20  
21  
22  
23  
24  
25  
26  
27  
28  
29  
30  
31  
32  
33  
34  
35  
36  
37  
38  
39  
40  
41  
42  
43  
44  
45  
46  
47  
48  
49  
50  
51  
52  
53  
54  
55  
56  
57  
58  
59  
60
- a. GROWTH
    - i. Weight should be measured at least twice a week, and plotted on CLOSE MONITORING WHO growth chart weekly. More frequent weights required for some babies should be plotted on a daily weight chart
    - ii. Head circumference should be measured and plotted weekly
    - iii. Length should be measured and plotted within the first week, and every 2 weeks thereafter.
    - iv. If a baby is too sick to be weighed and measured so cannot be plotted, mark the bottom of the growth chart at date with a triangle ( $\Delta$ ) at the day's date.
    - v. Targets for weight – changes in weight in the early days of life usually reflect fluid balance: aim for weight loss of no more than 10% from birth weight. Once baby is stable and growing, aim for gain of 15-20 grams/kg/day
    - vi. Head circumference and length: normally expect increase of 0.75 cm/week
  - b. BIOCHEMISTRY
    - i. **First week of PN:**
      - Full TPN Profile daily (FULL IP MG on eQuest, this includes U&E's, Calcium, magnesium phosphate and LFTs)
      - FBC twice weekly
    - ii. **Second and subsequent week of PN:**
      - Full TPN Profile and FBC twice weekly if stable (daily if still unstable)
    - iii. **Triglycerides** should be measured weekly (ideally Mondays) when on IV lipid
    - iv. **If on PN for longer than 1 month, then Trace elements (Zn, Cu, Se, Mn – use special blood bottle in Dr's Office) and Vitamins (A, D and E) should be measured monthly. Consider measuring Iron status and clotting**
    - v. **When on enteral feeds:**
      - Infants in the High and Medium risk categories need weekly FBC, U&Es, LFTs and Bone profiles once they are off PN and fully enterally fed. This can be extended to once fortnightly when babies are moved into Special Care.
  - c. SCREENING
    - i. A Neonatal Nutrition Screening form should be completed on admission and on Sunday/Monday when the baby has been weighed and measured each week on all babies to identify those requiring nutrition team review
  - d. NUTRITION TEAM REVIEW
    - i. Nutrition ward rounds take place on Tuesday mornings from 0900-1100. Nutrition team will see all 'high-risk' babies, and any others identified by nutritional screening on Sunday/Mondays.

### 3. NUTRIENT REQUIREMENTS

Nutrient requirement for Term and Preterm infants in the first weeks of life are summarised below. The figures shown below are based on the parenteral requirements for the first week, and the enteral requirements for the subsequent weeks (for a full list of parenteral and enteral requirements see Appendix 1).

Term infants – based on intake in 150 ml/kg breast milk; preterm infants based on recommendations in Tsang 2005 unless otherwise stated.

There are no specific guidelines for those babies born over 1.5kg and under term weight (2.5 kg) but it can be anticipated that their nutritional needs will be between those of preterm infants and term infants. Nutritional support should therefore aim to deliver nutrient intakes in this area.

It should be noted that these are just recommendations, and some infants may require more of certain nutrients such as Sodium and Potassium as dictated by the results of blood tests.

| Nutrient<br>Unit/kg/day | Term<br>infant | Preterm<br>VLBW<br>1000-1500g<br>1 <sup>st</sup> week<br>(parenteral) | Preterm<br>VLBW<br>1000-1500g<br>After 1 <sup>st</sup><br>week<br>(enteral) | Preterm<br>ELBW<br>< 1000g<br>1 <sup>st</sup> week<br>(parenteral) | Preterm<br>ELBW<br>< 1000g<br>After 1 <sup>st</sup><br>week<br>(enteral) |
|-------------------------|----------------|-----------------------------------------------------------------------|-----------------------------------------------------------------------------|--------------------------------------------------------------------|--------------------------------------------------------------------------|
| Energy (kcal)           | 100            | 60-70                                                                 | 110-130                                                                     | 75-85                                                              | 130-150                                                                  |
| Protein (g)             | 1.5-2.1        | 3.5                                                                   | 3.4-4.2                                                                     | 3.5                                                                | 3.8-4.4                                                                  |
| Nitrogen (g)            | 0.24-0.34      | 0.56                                                                  | 0.54-0.61                                                                   | 0.56                                                               | 0.61-0.70                                                                |
| Sodium (mmol)           | 1.4            | 2.0-5.0                                                               | 3.0-7.0                                                                     | 2.0-5.0                                                            | 3.0-7.0                                                                  |
| Potassium<br>(mmol)     | 2.0            | 0-2.0                                                                 | 2.0-3.0                                                                     | 0-2.0                                                              | 2.0-3.0                                                                  |
| Calcium<br>(mmol)       | 1.25           | 1.5                                                                   | 2.5-5.5                                                                     | 1.5                                                                | 2.5-5.5                                                                  |
| Phosphate<br>(mmol)     | 1.3            | 1.5-1.9                                                               | 1.9-4.5                                                                     | 1.5-1.9                                                            | 1.9-4.5                                                                  |
| Vitamin D IU*           | 340            | 40-160                                                                | 800-1000                                                                    | 40-160                                                             | 800-1000                                                                 |
| Vitamin A IU**          | 1150           | 700-1500                                                              | 700-1500                                                                    | 700-1500                                                           | 700-1500                                                                 |
| Iron (umol)             | 17.9           | 0                                                                     | 35.8-71.6                                                                   | 0                                                                  | 35.8-71.6                                                                |

\*Vitamin D = dose quoted is total daily dose; ESPGHAN 2010 recommendation for enteral dose for preterm infants; term infants DH Dietary Reference Values 1991 (340 IU = 8.5 mcg Vit D)

\*\*Vitamin A = dose quoted is total daily dose; term infants DH Dietary Reference Values 1991 (1150 IU = 350 mcg of Vitamin A retinol equivalent)

#### 4. STANDARD NUTRITION SUPPORT –

##### (a) OVERVIEW - GETTING STARTED - EARLY TPN AND TROPHIC MILK FEEDS

##### **HIGH RISK / MEDIUM RISK (see flow charts for high [A] and medium risk preterm infants [B])**

- Aim to introduce milk feeds gradually while maintaining calorie and nutrient intake with PN
- Before starting or increasing milk ensure baby is clinically stable and abdomen soft
- Ensure mother has lactation support to start expressing (see breastfeeding care pathway)

##### **High risk preterm (<28 weeks; <1000g; severe IUGR/AREDFV <35 weeks)**

|         |                                                                                                                                                                                                                                                                                              |
|---------|----------------------------------------------------------------------------------------------------------------------------------------------------------------------------------------------------------------------------------------------------------------------------------------------|
| Day 1   | Start Stock Preterm PN at 60-90 ml/kg/day via UVC or long line, as soon as possible unless baby very unstable. Give fresh colostrum as mouth care or as trophic feeds                                                                                                                        |
| Day 2-3 | Start trophic feeds: MBM 1 ml/kg 2-4 hourly (if no MBM can use DBM- see choice of milk chart);                                                                                                                                                                                               |
| Day 3-7 | Change to Stock Preterm + Sodium PN when 6% weight loss from birthweight [7], additional sodium required, or by day 5, whichever soonest. Increase milk by 10-20 ml/kg/day as tolerated (see table); Aim to decrease PN flow rates with feeds only once baby on total fluids of 180ml/kg/day |

##### **Moderate risk preterm (28-31<sup>+6</sup> weeks; 1000g <1500g; mod IUGR/AREDFV < 35 weeks)**

|         |                                                                                                                                                                                                                                                                     |
|---------|---------------------------------------------------------------------------------------------------------------------------------------------------------------------------------------------------------------------------------------------------------------------|
| Day 1   | Start Stock preterm PN at 60-90 ml/kg/day via UVC or long line as soon as possible; if no central access consider peripheral PN                                                                                                                                     |
| Day 1-2 | Start colostrum/milk 1 ml/kg 2 hourly ('see choice of milk' chart)                                                                                                                                                                                                  |
| Day 3-7 | Change to Stock Preterm + Sodium PN when 6% weight loss, or by day 5, whichever is sooner. Aim to decrease PN flow rates with feeds only once baby on total fluids of 180ml/kg/day. Increase milk by 20-30 ml/kg/day according to clinical condition and tolerance; |

##### **High / moderate risk term or near-term infants**

All high/moderate risk babies should have a plan for nutrition support on admission and periods greater than 48 hours without protein and micronutrients should be unusual

##### **Low risk**

|         |                                                                             |
|---------|-----------------------------------------------------------------------------|
| Day 1   | Commence milk feeds 30-60 ml/kg/day, supplemented by IV fluids if necessary |
| Day 2-7 | Increase milk feeds by 30 ml/kg/day as tolerated                            |

##### **NOTES**

- If severely unwell or acidotic, PN may need to be delayed (though contains acetate)
- Babies with HIE undergoing therapeutic hypothermia, may tolerate trophic milk feeds
- For babies with surgical problems, see 'surgical guidelines' – section 6

Version: 1.0

Issued: December 2011

Disclaimer: It is your responsibility to check against StaffNet that this printout is the most recent issue of this document

Page 12 of 37

#### 4. (b) PARENTERAL NUTRITION

##### i) Indications for PN

- High or Moderate risk infants as described above
- Infants who are NBM and unlikely to achieve adequate milk intake in the next 5 days
- Infants who are not tolerating feeds such that they cannot take full feed volumes for 5 consecutive days

##### ii) Starting PN

- In high and moderate risk infants PN should be started as soon as possible as delay can result in significant and cumulative nutrient deficits.
- Birth weight  $\leq 1500\text{g}$  – start as soon as possible after birth
  - Ideally within 6 hours
- Birth weight  $>1500\text{g}$  – if enteral feeding contra-indicated, start PN by
  - 48 hours in 1500-2500g
  - 72 hours in 2500-3500g if NBM
- Central line insertion (UVC or peripherally inserted central venous line) should be a priority for high and moderate risk infants
- If feeds are stopped on high or medium risk infant for any reason, re-stat PN

##### iii) Stock PN

- Infants should be started on Stock PN in the first instance as detailed below:
  - Preterm PN – For preterm infants ( $<37/40$  gestation) where additional sodium is not indicated (ie until 6% weight loss, or day 5 of life)
  - Preterm + Sodium PN- For preterm infants ( $<37/40$  gestation) requiring maintenance sodium. **This should be the PN of choice for the majority of preterm infants after the first few days following birth**, as it contains more protein.
  - Term PN – for Term infants ( $\geq 37$  weeks gestation) at any point after birth.
- Stock PN comprises an aqueous solution (glucose, amino acids, electrolytes and trace elements) and a lipid solution (**which contains both fat- and water-soluble vitamins**). For adequate nutrition it is **important that the lipid is always given with the aqueous solution** at all times (except when well advanced on enteral feeds - see below).

##### iv) Pharmacy made ('bespoke') PN

- Neither PN alone nor unfortified full breast milk feeds fully meet the nutritional needs of preterm infants, so the period when a preterm infant transitions from PN to milk feeds is when they are at highest risk of poor nutrient intakes.
- Stock PN is designed to give the maximum possible nutrition at 130ml/kg/day. **Therefore, pharmacy can make bespoke PN, which provides more nutrition in a smaller volume, should be used whenever a preterm infant is receiving less than 130ml/kg/day of Stock PN.** This will occur whenever a preterm infant is increasing on enteral feeds, is fluid restricted, or receiving other infusions
- Bespoke PN may also be appropriate where infants have electrolyte requirements than cannot be met with Stock PN

**v) Reducing PN as enteral feeds increase**

- **Only once the infant is receiving 180ml/kg/day total fluids should the PN solution be decreased as enteral feeds increase** (unless there is a clinical decision to restrict fluids).
- Once the infant is on 90ml/kg/day enteral feeds, the rate of lipid infusion should be halved, and then stopped when the infant reaches 135ml/kg/day enteral feeds (beware with pharmacy made TPN as this reduction in lipid may have already been done as part of the prescription). Any shortfall in total fluid volume due to the reduction in lipid should be made up by increasing the aqueous PN solution, to allow maximum protein to be delivered to the infant (though do not go above the maximum prescribed rate). This is important when infants are on Stock PN, but for those on bespoke PN, the reduction in lipid may have already been done/accounted for by the pharmacists when the PN was prescribed so may not be necessary (check with the pharmacists first). **Remember that once the lipid is stopped, vitamin intake will be inadequate until Abidec is started.**

**vi) Peripheral PN**

- PN should ideally be given via a central line. However, there are occasions in high nutritional risk infants with difficult access where the benefits of giving PN peripherally may outweigh the risks. Such decisions should be made by the Consultant responsible for the patient.

**vii) Cautions on PN**

SEPSIS - may affect lipid metabolism; measure triglycerides and if  $>2.8\text{mmol/L}$  consider reducing or stopping IV lipid for 12-24 hours in severely septicaemic baby (remember to restart/increase lipid when sepsis has resolved)

THROMBOCYTOPENIA – high concentration of polyunsaturated fats may impair platelet adhesion: reduce lipid to 1-2 g/kg/day if platelets  $<50$ .

CHOLESTATIC JAUNDICE – total and prolonged PN increases the risk, so try to give some enteral feed if at all possible; other risk factors include IUGR, sepsis and short bowel syndrome. Lipid solutions containing fish oil (eg SMOF) can reduce or reverse cholestasis, and should be considered in high risk babies if on PN for 4 weeks or more. Alternate day lipid may also be indicated in this situation, or if altered liver function - discuss with the pharmacists.

#### 4 (c) ENTERAL NUTRITION

- i. **Starting feeds** – see section 4(a) for guidance. Before starting feeds ensure baby is clinically stable and abdomen soft. In high-risk infants trophic feeding should be started within the first 72 hours if at all possible to minimise intestinal mucosal atrophy, and continued until ready to progress.
- ii. **Choice of milk** – Mother's breast milk is almost always the feed of first choice, unless contraindicated by maternal illness or drugs. If no maternal milk available pasteurised donor breast may be used for high risk babies (parental consent required) in accordance with the DBM guideline. Preterm formula (LBW/Aptamil Preterm) is indicated for infants with gestation <34 weeks, or birth weight <1800 grams; Post discharge formula (Nutriprem 2) is indicated for preterm infants either as sole diet or in addition to breast-feeding from around 36 weeks (or at discharge) up to 6 months corrected. (see Flow Chart D)
- iii. **Advancing feeds** – see section 4 (a) for guidance on volumes
- Before starting or increasing milk ensure baby is clinically stable and abdomen soft. Small gastric residuals can be tolerated if baby well. Passage of meconium and then changing stools is an important indication of gut motility. Glycerine suppositories may be useful if no stool passed for 48 hours.
  - Feeds can be increased by 10-20ml/kg/day in high-risk, 20-30ml/kg/day in moderate risk and 30 ml/kg/day in low risk babies
  - Test for residuals 4-6 hourly
  - If baby vomits, or has residuals >25% of the previous 4 hours total feed volume and persisting or increasing examine and assess baby and refer to flow chart C
- iv. **Nutritional supplements**
- BREAST MILK FORTIFIER (BMF, see high risk and moderate risk flow charts A and B) - 'multi-component' fortifier provides additional calories (carbohydrate), protein (cows' milk based), minerals and vitamins in a powder which is added to mother's breast milk. It should be more or less routine for babies with birth weight <1500g to receive fortifier once they have tolerated 150 mls/kg/day of MBM for 24 hours, unless significant gut or renal compromise. Blood Urea and albumin levels provide useful markers of protein status. In general, give ½ strength for 24-48 hours and then increase to full strength (2.2g sachet to 50 mls MBM), though it may be preferable to increase the fortifier by ¼s in high risk infants. For some extremely high risk infants it may be prudent to start fortifier when on 120-135 mls/kg/day of MBM and increase strength more gradually as PN is gradually reduced, in order to ensure the baby will be able to achieve enteral nutrient targets before stopping PN.



- Vitamins and Iron – breast milk provides insufficient vitamins (particularly vitamin A and D) for preterm infants, and virtually no iron. Abidec (multivitamins) and Sytron (iron) should be started according to NNU guideline
- Electrolytes and minerals
  - Small doses should be given as boluses, as scheduled on drug chart
  - Sodium : aim to maintain serum sodium 135-145 mmol/L  
If on > 4 mmol/kg/day, add to daily feeds in milk kitchen; if < 4 mmol/kg/day, give as divided bolus drugs (ideally as a four times daily regimen)
  - Phosphate: content of BM is low. Aim to maintain serum inorganic phosphate levels greater than 1.8mmol/L. Usually given as Potassium Acid Phosphate 0.5-2mmol/kg/day. If required as outpatient, may be preferable to use BMF

#### v. Nutrition at discharge

It is important to start discharge-planning well in advance. Breast-feeding at discharge is the preferred goal for all infants. However for preterm infants nutritional supplementation will be required. For those not being breast fed advice has to be given on choice of formula, so for all infants a pre-discharge nutrition assessment should be made and plan documented.

#### MUM PLANNING TO BREAST FEED

- Ensure lactation support is on-going re feeding technique
- Discuss with Out-reach sister re support at home
- **All preterm infants (<35 weeks) should have Abidec (1 ml) and Sytron (1 ml) daily**
- Assess growth
  - If growth has been good and weight, length and HC are no more than 0.67 SD (ie one centile line) below birth levels, then assess weight gain after 48 hours. If satisfactory can go home breast-feeding
  - If baby has had significant post-natal growth restriction and is >1.33 SD below birth (2 centile lines), discuss with Nutrition team / Dietician and consider discharge on BMF, with Outreach Support
  - For those with modest growth restriction, i.e. between one and two centile line drop, review overall pattern of growth and consider requesting nutrition review and Outreach support.

#### MUM PLANNING TO FORMULA FEED

- Babies <34 weeks gestation, with birthweight <2kg can be considered for discharge on Post-Discharge Formula (PDF) – ‘Nutriprem 2’. This should be continued until 3 to 6 months corrected age.
- ELBW and VLBW babies who have been on LBW formula should be changed to PDF at approximately 36 weeks corrected age, or when beginning to take most feeds by bottle. For those who have had severe extra-uterine growth restriction, continuing with LBW formula to 40 weeks corrected age may be appropriate.
- Babies discharged on PDF should have Abidec 0.6 ml, but not Sytron.
- If changing to term formula, prescribe Abidec 1 ml (continue until at least one year post term) and Sytron 1ml (continue until 6 month post term)

SOLIDS – can be introduced at 5-8 months REAL AGE (ie not corrected for prematurity)

**5. MANAGEMENT OF COMMON GUT AND FEEDING PROBLEMS** – see flow chart C

- a. **Gastric aspirates / residuals** – preterm infants have immature gut motility, and aspirates/residuals and small vomits are not uncommon. Dark green bile stained aspirates, particularly in association with abdominal distension and / or tenderness are a cause for concern. However small milky / yellow aspirates up to 2-3 mls are frequently normal. They can be replaced, and feeds continued.
- b. **Abdominal distension** – this is another common feature in preterm infants, due to poor gut motility. It tends to be more common in babies on nasal CPAP, with high volumes of air flowing into the upper airway and oesophagus. Tenderness, or systemic symptoms and signs such as apnoea, tachycardia or temperature instability should raise concern. If baby is otherwise well, a small glycerine suppository may help to stimulate peristalsis, and enable feeds to be continued.
- c. **Suspected NEC** – classical features are blood and mucous in stools, bile stained aspirates and abdominal tenderness. Systemic signs such as tachycardia and hypotension occur in severe NEC. X-ray might show intramural gas ('pneumatosis coli'), dilated loops of bowel, free air, or a 'gas-less' bowel. In suspected NEC feeds should be stopped, and urgent attention paid to supporting ventilation, circulation and fluid balance.
- d. **Suspected GOR** – mild milk reflux is common in newborn babies, including those born preterm and is usually self-limiting. It is rarely the cause of significant cardio-respiratory disturbance. However, apnoea and bradycardia are common in preterm babies and may occur in association with feeds. Try to avoid using gaviscon in babies who are having fortified MBM as the milk becomes excessively thick.
- e. **Suspected Food Protein Intolerance** – food protein (e.g. cow's milk protein) intolerance can occur in young infants either breast fed or formula fed. Symptoms may include severe regurgitation, vomiting, constipation, peri-anal rash, blood in stools and iron deficiency anaemia. Non-intestinal features may include skin rash – atopic eczema, and colic. If this is thought to be the cause of symptoms, it is recommended that cow's milk protein be excluded from diet. If breast feeding, mother should exclude both cows' milk and egg products from her diet for two weeks, while continuing to breast feed. Formula fed infants should be tried on amino acid formula. If improvement is seen, a staged reintroduction should be carried out. If no improvement is seen on definite exclusion diet, food protein intolerance is unlikely. If exclusion diet is difficult to maintain, a trial of amino-acid formula may be breast fed infants. See review by Vandenplas et al.[8]

## 6. MANAGEMENT OF BABIES WITH SURGICAL BOWEL CONDITIONS WHICH MAY COMPROMISE NUTRITION

Information has been extracted from the NEONATAL SURGERY CLINICAL AIDS on SUHTranet:

(<http://staffnet/Departments/DivisionC/Womenandnewborn/Neonatalservices/Neonatalurgery/Neonatalurgeryclinicalaids/Anorectalmalformations.aspx>)

This website should be checked to ensure that the most up to date version of the guidance is used.

### GASTROSCHISIS

All babies with gastroschisis will require TPN.

For those treated with a Medicina Silo insertion at the cot-side a percutaneous long line should be sited on the Neonatal Unit but line insertion should ideally be delayed until after gut manipulation has ceased, i.e. once the silo has been removed and the defect closed, to reduce the chance of line colonisation. The median time to closure is 4 days. If it is felt that TPN should be commenced before this time then this can be given via peripheral cannula. In babies in whom it is thought there may be a delay in defect closure it may be better to proceed with line insertion prior to closure. As some gastroschisis babies may go on to have intestinal failure and require long term central venous access, central lines should only be inserted by staff with considerable experience of line insertion so as to avoid loss of suitable veins.

If the baby is taken to theatre for primary closure or surgical silo creation a percutaneous long line can be inserted in theatre at the time if someone with the appropriate expertise is available.

Duration of TPN may vary from 10 days to 6 weeks with a mean of 3 weeks. In rare cases gut function may be impaired for many months.

### DUODENAL ATRESIA

A trans-anastamotic tube (TAT) can be placed during surgery, which allows feeding into the jejunum. A naso/orogastric tube will also be required for gastric decompression. Usually a 6Fr enteral feeding tube is placed nasojejurally and an 8Fr nasogastric tube placed down the other nostril. In preterm babies this may produce problems due to obstruction to both nostrils. In this situation it may be better to pass an orogastric 8Fr tube and leave one nostril patent.

Poor duodenal contractility may delay normal oral feeding for as long as 3 weeks. This may be overcome by transanastamotic feeding although there is evidence that this may delay eventual oral feeding. It is NOT usually necessary to place a long line or commence TPN because of the use of TAT feeding. Duration of admission is about 7 - 10 days but may be longer if motility is very delayed.

### EXOMPHALOS

Nutritional support: Most babies who have undergone primary closure will tolerate enteral feeding soon and not need TPN. Most babies with a silo will require a long line and TPN

## MECONIUM ILEUS

Feeding may start when gut recovery from surgery allows. Usually start on MBM or standard formula feed grading up slowly. Feed may need to change to hydrolysed formula if weight gain inadequate on breast milk or standard formula. Occasionally TPN is needed.

80-90% of babies with MI are deficient in pancreatic enzymes, and supplementation with 'Creon®' may be required. Further details are provided in Surgical Clinical Aids and treatment will usually be guided by advice from the CF team

## OESOPHAGEAL ATRESIA and TRACHEO-OESOPHAGEAL FISTULA

A trans-anastomotic tube (TAT) nasogastric tube will be placed at time of surgery and feeding usually commences via the TAT at 48hrs post-op. If the TAT falls out do not re-pass as this may perforate the anastomosis. Consult the surgical team immediately.

Oral feeding normally starts between 3 and 5 days post-op at the discretion of the surgical team.

Gastro-oesophageal reflux prophylaxis: some surgeons use ranitidine post-op for 3 - 6 months. Others do not.

7. FLOW CHARTS

a. Starting and Increasing Feeds- HIGH RISK INFANTS



b. Starting and Increasing Feeds- MODERATE RISK INFANTS

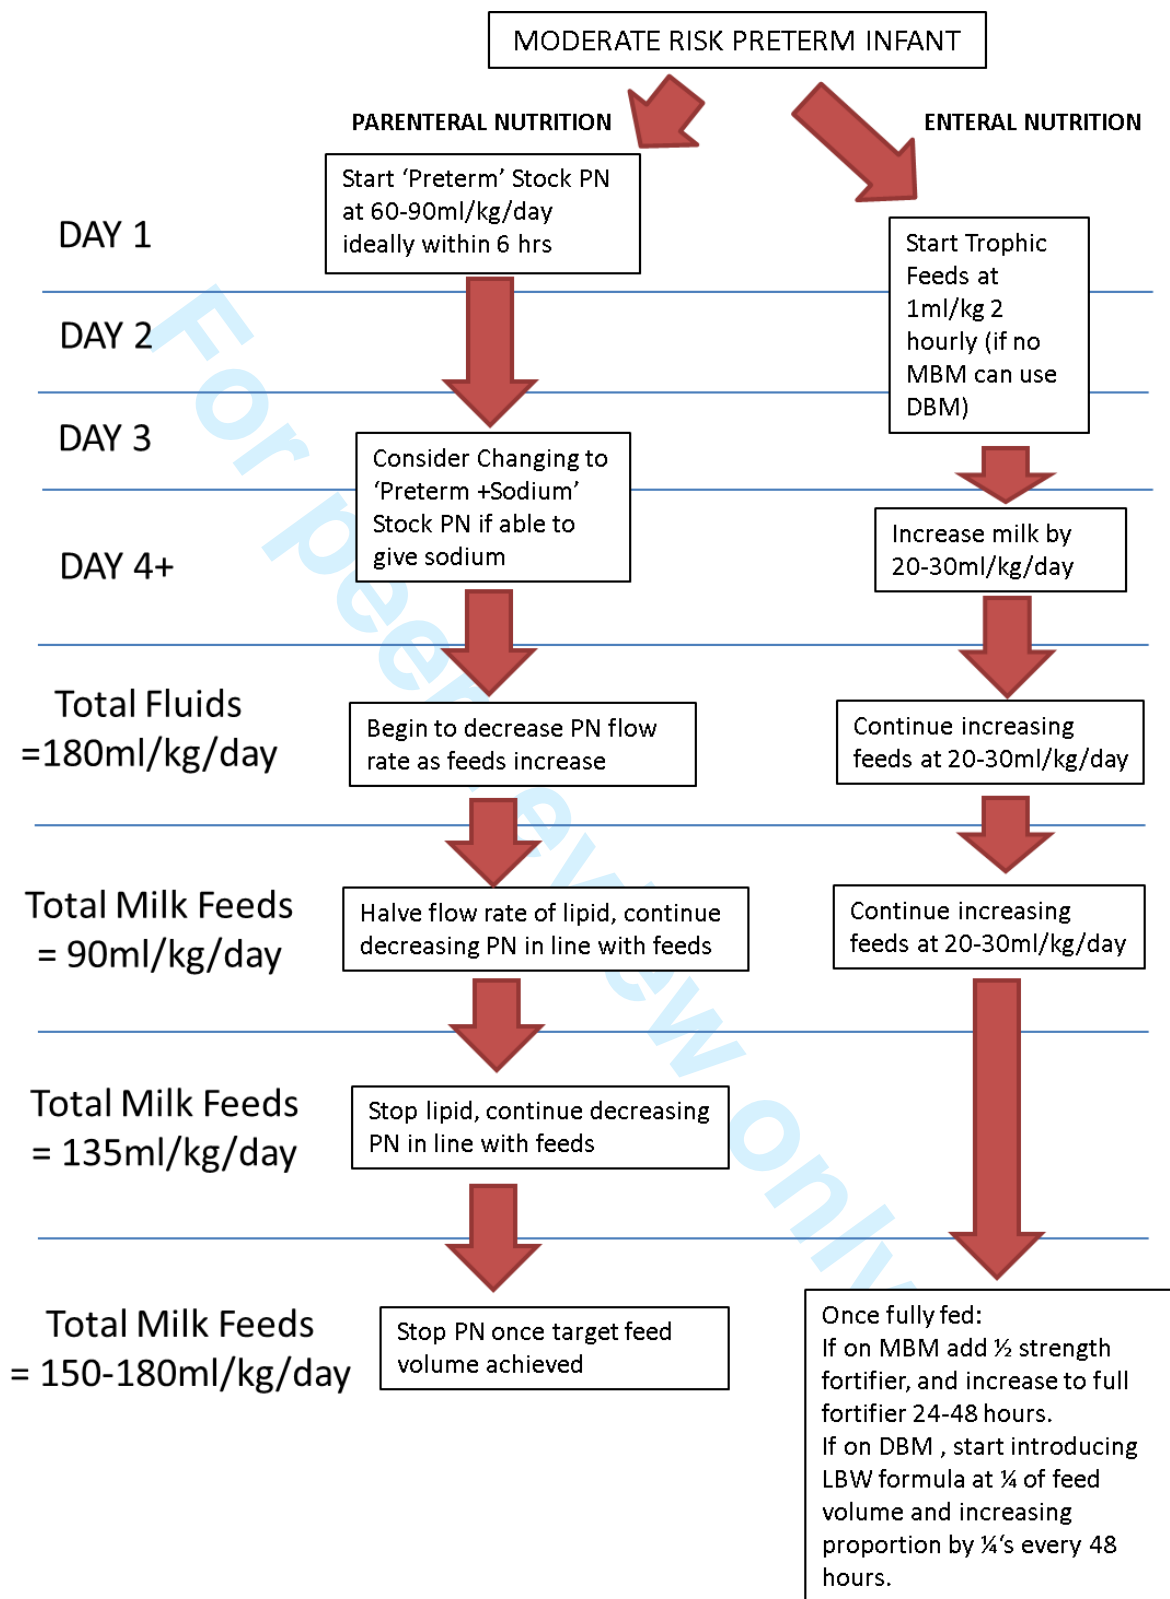

**b. Management of common feed-related problems**

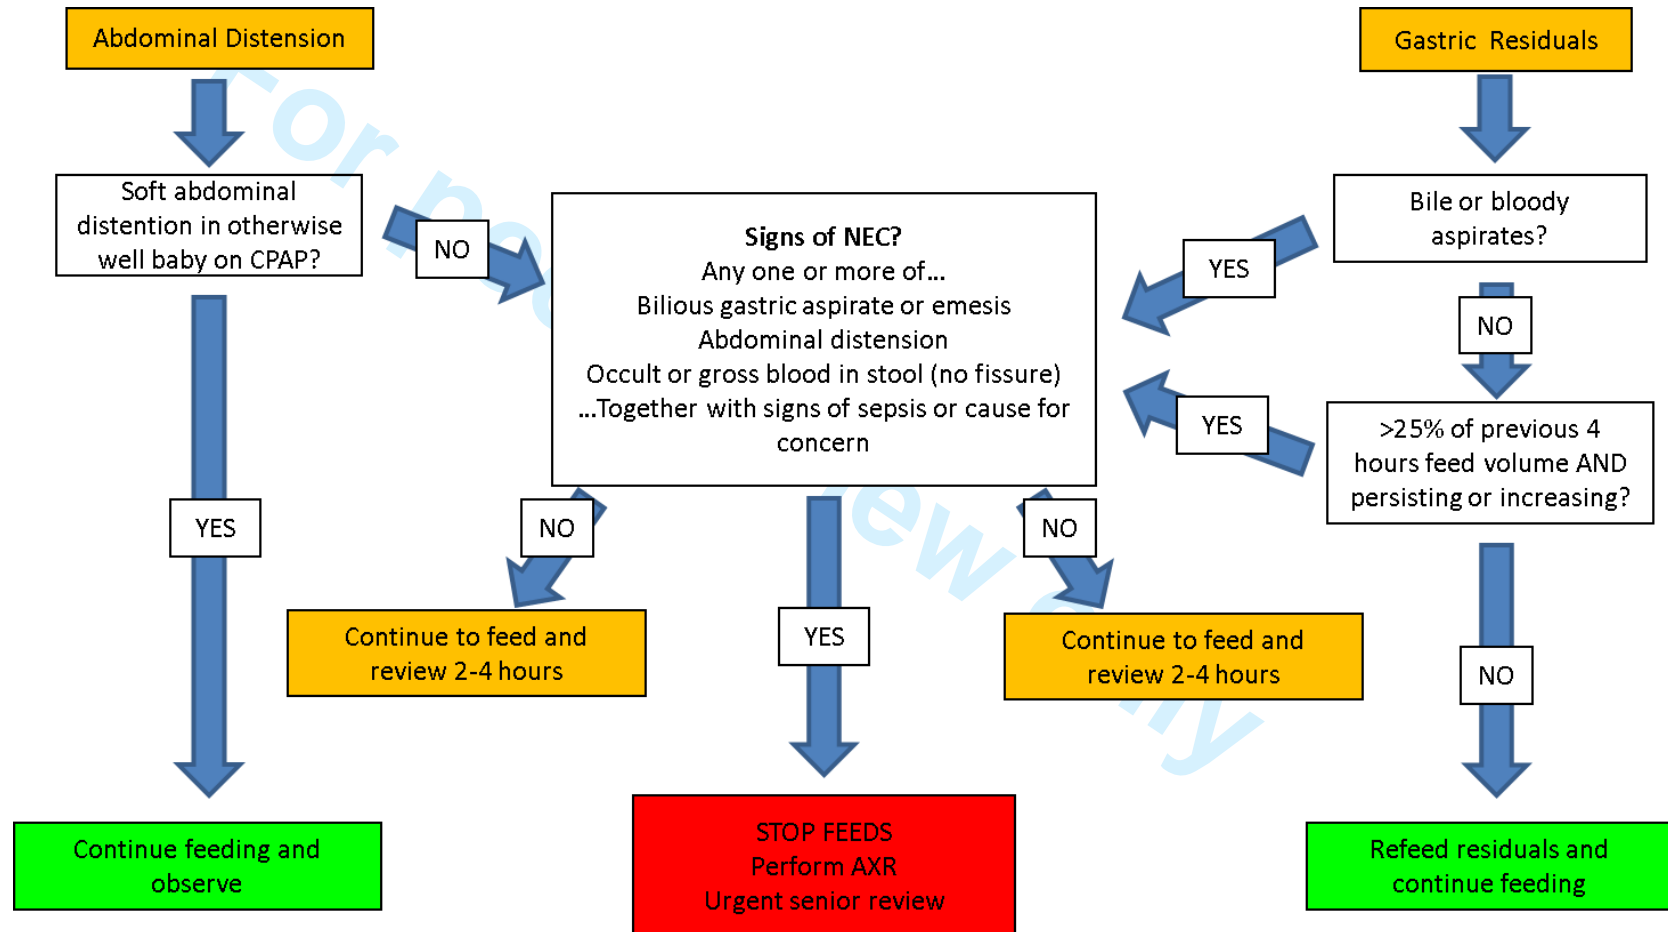

**c. Choice of Milk**

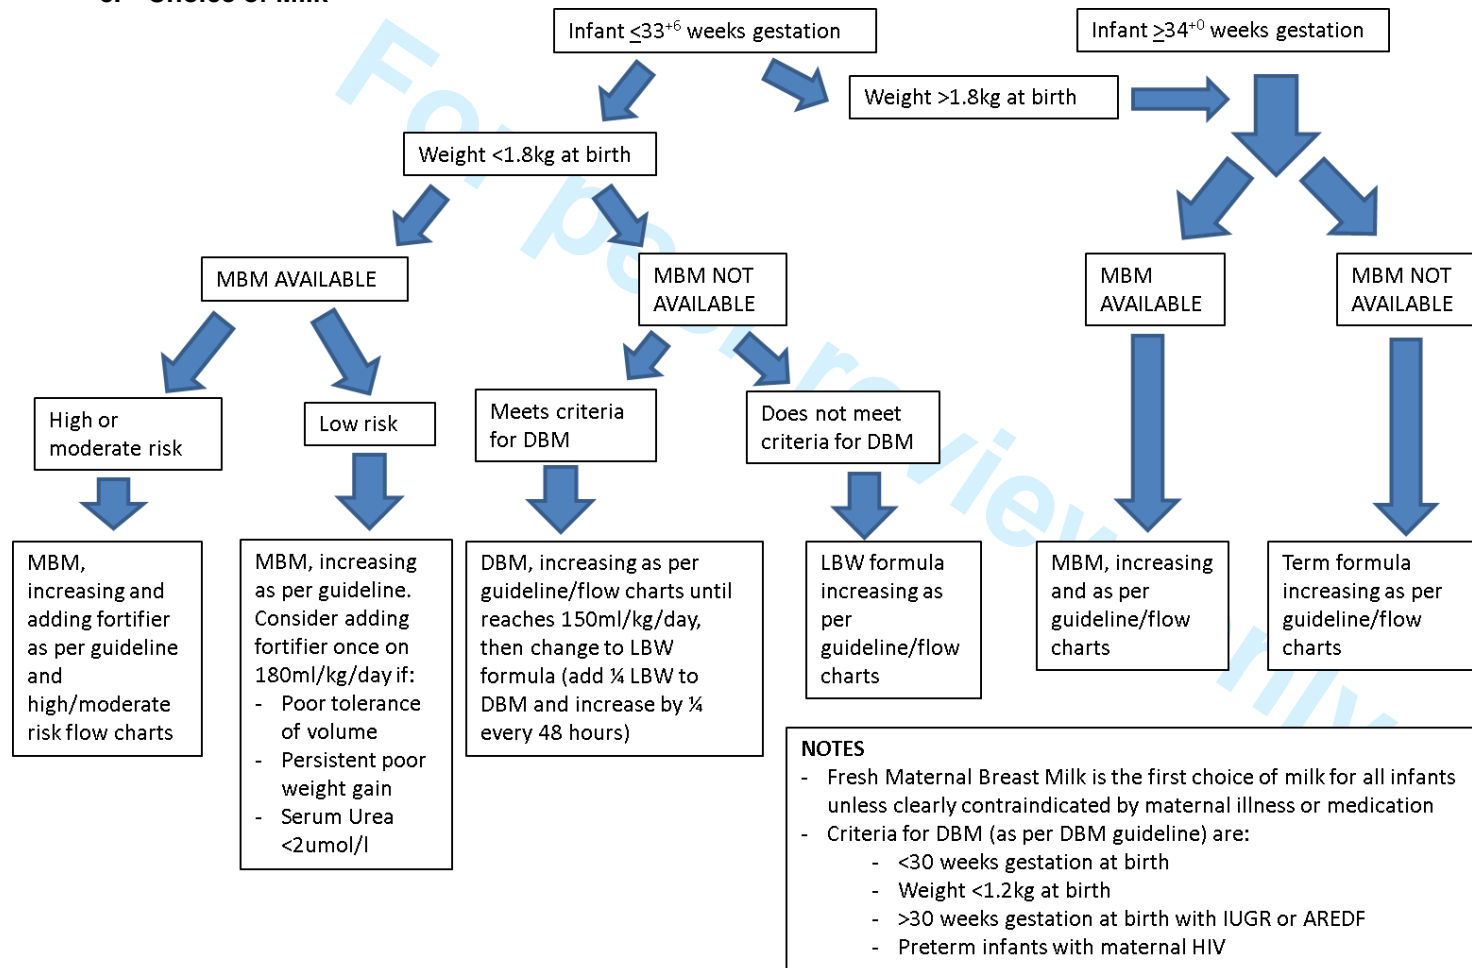



**8. TABLES**

## a. Starting and Increasing Feeds

## i. High Risk Infants (based on increases of 10-20ml/kg/day)

| Weight (kg)   | Start at (hourly) | Start at (2 hourly) | Increase hourly feed volume by* | Increase 2hourly feed volume by |
|---------------|-------------------|---------------------|---------------------------------|---------------------------------|
| less than 0.6 | N/A               | 0.5                 | 0.25ml every 24 hours           | 0.5ml every 24 hours            |
| 0.6-0.9       | 0.5               | 1                   | 0.5ml every 24 hours            | 1ml every 24 hours              |
| 0.9-1.2       | 0.75              | 1.5                 | 0.5ml every 12 hours            | 1ml every 12 hours              |
| 1.2-1.5       | 1                 | 2                   | 0.5ml every 8 hours             | 1ml every 8 hours               |
| 1.5-1.8       | 1.25              | 2.5                 | 0.5ml every 6 hours             | 1ml every 6 hours               |
| 1.8-2         | 1.5               | 3                   | 1ml every 12 hours              | 2ml every 12 hours              |

## ii. Moderate Risk Infants (based on increases on 20-30ml/kg/day)

| Weight (kg)   | Start at (hourly) | Start at (2 hourly) | Increase hourly feed volume by:* | Increase 2hourl feed volume by: |
|---------------|-------------------|---------------------|----------------------------------|---------------------------------|
| 1.0-1.2       | 1                 | 2                   | 0.5ml every 6 hours              | 1ml every 6 hours               |
| 1.2-1.6       | 1.5               | 3                   | 1ml every 12 hours               | 2ml every 12 hours              |
| 1.6-2.0       | 2                 | 4                   | 1ml every 8 hours                | 2ml every 8 hours               |
| 2-2.4         | 2.5               | 5                   | 1ml every 6 hours                | 2ml every 6 hours               |
| 2.4 and above | 3                 | 6                   | 1.5ml every 8 hours              | 3ml every 8 hours               |

\*Note that this refers to the actual feed **volume** based on 1 hourly feeds. Therefore if baby is 2 hourly fed then multiply the amount on this table by 2 to give the increase on the feed volume, if on 3 hourly feeds multiply by 3 and so on.

| Fluid Name<br>Nutrient                                                     | Preterm Stock PN | Preterm + Sodium Stock PN | Term Stock PN | Stock Lipid         | Dextrose 10%        | MBM/DBM | MBM with Full Fortifier* | Neocate LCP | Peptijunior | LBW Formula (Aptamil Preterm) | Post D/C Formula (Nutriprem 2) | Term formula | Infantrini |
|----------------------------------------------------------------------------|------------------|---------------------------|---------------|---------------------|---------------------|---------|--------------------------|-------------|-------------|-------------------------------|--------------------------------|--------------|------------|
| Energy (kcal)                                                              | 63.0             | 59.8                      | 70.2          | 166.7               | 40.0                | 69.0    | 85.0                     | 71.0        | 66.0        | 80.0                          | 75.0                           | 66.0         | 100.0      |
| Protein (g)                                                                | 2.3              | 2.8                       | 2.5           | 0                   | 0.0                 | 1.3     | 2.5                      | 2.0         | 1.8         | 2.6                           | 2.0                            | 1.3          | 2.6        |
| Carbohydrate (g)                                                           | 12.1             | 11.0                      | 13.5          | 0                   | 0.0                 | 7.2     | 10.0                     | 8.1         | 6.8         | 8.4                           | 7.4                            | 7.3          | 10.3       |
| Fat (g)                                                                    | 0                | 0                         | 0             | 16.7                | 0.0                 | 4.1     | 4.1                      | 3.5         | 3.5         | 3.9                           | 4.0                            | 3.5          | 5.4        |
| Sodium(mmol)                                                               | 0.0              | 4.3                       | 2.8           | 0.1                 | 0.0                 | 0.7     | 2.2                      | 0.8         | 0.9         | 3.0                           | 1.2                            | 0.7          | 1.1        |
| Potassium (mmol)                                                           | 2.4              | 1.7                       | 1.9           | 0                   | 0.0                 | 1.5     | 2.1                      | 1.6         | 1.7         | 2.1                           | 2.0                            | 1.6          | 2.4        |
| Calcium(mmol)                                                              | 0.8              | 1.0                       | 0.9           | 0                   | 0.0                 | 0.8     | 2.5                      | 1.2         | 1.2         | 2.3                           | 2.2                            | 1.2          | 2.0        |
| Phosphorous (mmol)                                                         | 1.0              | 2.2                       | 0.9           | 1.5                 | 0.0                 | 0.5     | 1.7                      | 1.1         | 0.9         | 2.0                           | 1.5                            | 0.9          | 1.3        |
| Iron (umol)                                                                | 0.0              | 0.0                       | 0.0           | 0.0                 | 0.0                 | 1.3     | 1.3                      | 18.8        | 13.8        | 25.1                          | 17.9                           | 9.5          | 21.5       |
| Vitamin A (IU)                                                             | 0.0              | 0.0                       | 0.0           | 3910.0              | 0.0                 | 213.0   | 985.6                    | 264.0       | 173.2       | 599.4                         | 269.7                          | 183.2        | 333.0      |
| Vitamin D (IU)                                                             | 0.0              | 0.0                       | 0.0           | 680.0               | 0.0                 | 0.0     | 200.0                    | 51.0        | 52.0        | 120.0                         | 68.0                           | 48.0         | 68.0       |
| Volume (ml/kg) required to reach recommended protein intake (ELBW infants) | 152              | 125                       | 140           | Contains no protein | Contains no protein | 292     | 152                      | 195         | 211         | 146                           | 190                            | 292          | 146        |

## b. Nutrient Content of Commonly Used Products per 100ml

Typical Values are used and are correct at 18/10/2011

\*Based on Cow and Gate Nutriprem Breast Milk Fortifier

## 9. SUPPORTING INFORMATION

### GUIDELINES AND NUTRITIONAL CARE

There is good evidence from large epidemiological studies such as EPICure that preterm infants often fail to grow adequately, dropping to significantly lower centiles for weight and head circumference at discharge than those which they were born on[9, 10]. There is also evidence that growth failure is also associated with poorer neurodevelopmental outcomes[11]. One significant causative factor for this failure of growth is that these infants receive inadequate nutrition, and there is evidence that they fail to achieve appropriate targets for nutrient intake[12, 13]. Feeding practices across different neonatal units has been shown to be one of the factors responsible for the variability in lengths of stay and the level of postnatal growth restriction seen between different units offering the same level of care[14]. Although there is uncertainty around the definitive practice of nutritional support in preterm infants, there is evidence that standardisation of practice and the use of guidelines is beneficial. A systematic review and meta-analysis by Patole and De Clerk in 2005 showed that the use of standardised feeding regimens reduced rates of NEC, and in the context of the Vermont Oxford Network's 'Potentially Better Practices for Nutrition', the standardisation of practice was shown to reduce the time to start TPN and enteral feeds, improve use of breast milk, reduce lengths of stay and a lower rate of infants being discharged with weights below the 10<sup>th</sup> centile [4, 15]. Donovan et al studied aspects of nutrient intake and outcomes before and after the introduction of nutrition support guidelines in their NICU, showing significantly earlier initiation of both parenteral and enteral feeding, earlier achievement of full enteral feeding, and earlier regaining of birth-weight after introduction of guidelines[16].

### ASSESSMENT AND MONITORING

Some babies are at higher risk than others of nutritional problems – under-nutrition, feed – related complications or both. Regular assessment of nutritional status and monitoring of growth will help identify infants with greater nutritional needs or a higher risk of poor growth or problems. Preterm infants in particular are at risk and should have their weight, head circumference and length measured at a minimum of once a week [4, 6, 17].

The following are things to consider when assessing nutritional risk

- Term babies with appropriate birth weight have good nutrient stores, designed to support them through the first few days when breast milk volumes are low. They are low risk.

- Preterm babies have low nutrient stores and are born at time of rapid growth – the earlier they are then the bigger the problem and the greater their nutritional risk. This is compounded by immature gut and metabolic function. They are moderate to high risk (depending on gestation) and need early nutrition support.
- Growth restricted babies have less nutritional reserve; they may also have reduced perfusion to the gut before birth and an increased risk of NEC. These babies will therefore be at greater risk compared to babies of a similar gestation.
- Congenital abnormalities such as gastrointestinal abnormalities, facial anomalies and cardiac problems (including PDA and associated treatment) will all affect nutritional status and increase nutritional risk.
- Acquired disorders such as hypoxic-ischaemic injury, sepsis and NEC will impact on the nutrition infants receive and in turn put them at higher risk of poor nutrition.
- Combinations of the any of the above factors will result in a greater overall risk.

## NUTRITIONAL REQUIREMENTS

TERM INFANTS: breast milk provides appropriate nutrients for healthy term babies and breast-feeding should be supported and encouraged. Babies who are not being breast fed should be fed on a standard cows' milk based formula.

PRETERM INFANTS: evidence-based recommendations are available to guide nutrient intakes for preterm infants. The most comprehensive is Tsang 2005 [2], which gives guidelines for parenteral and enteral nutrition support, and specifies requirements for babies <1000g and 1000-1500g birth-weight, during both 'transition' phase (days 2-7 of life) and 'growth phase' (day 7 onwards). ESPHGAN 2010 [1] gives recommendations for enteral intake of fluid and nutrients, though is largely based on the Tsang recommendations. Growth is rapid in the third trimester of fetal life; infants born preterm thus have high requirements for nutrients, but immature physiological capacity to handle them. Breast milk is the optimal first choice for preterm infants' nutrition, however even at high volumes will not provide all adequate nutrients: supplementation with breast milk fortifier or preterm formula may be necessary. The tables in this guideline refer to the Tsang recommendations for energy and protein in VLBW infants and how they compare to typical feeds used in Southampton. Note that only LBW formula milk fed at 150ml/kg/day or fully fortified breast milk fed at 180ml/kg/day is able to achieve the recommended amounts). The full Tsang recommended nutrient intakes are given in Appendix 1. Essentially, the less mature, the lower the nutrient stores/reserves, the earlier nutrient provision is required

## STANDARD NUTRITIONAL SUPPORT OF PRETERM AND SICK INFANTS

## a. PARENTERAL NUTRITION

i. *Early use of PN*

The VON Potentially Better Practices for nutrition state that TPN should be commenced as early as possible, ideally within the first 24 hours of life [4]. This helps prevent the net nutrient loss and catabolism that occurs when an infant is born prematurely. Significant nutritional deficits have been shown to occur in the first few days (up to 2 weeks) after birth, so introduction of TPN early is a strategy to help prevent this [12]. There is also good evidence that it promotes anabolism, prevents the loss of protein mass, improves calorie intakes, can improve growth and is safe [3, 18-21].

ii. *Protein intake*

As described above, nutrient delivery in high risk groups is challenging, and the delivery of protein and energy early in life often fails to meet recommended targets. Whilst intravenous glucose given early on will meet energy needs in many cases, it contains no protein, which can only be administered using TPN or milk feeds. Therefore, in high risk infants who cannot be fully fed quickly, it is vital to give the largest amount of protein possible as TPN, as early as possible to try and prevent the accumulation of deficits. In view of this, Stock TPN in Southampton has recently been reformulated to provide higher levels of protein in a smaller volume. Using high protein TPN to deliver higher protein intakes in the first few days of life in preterm infants has recently been shown to have metabolic benefits in addition to the prevention of catabolism, including a reduction in hyperglycaemia and insulin use [22], and a significant reduction non-oliguric hyperkalaemia [23].

iii. *Peripheral vs central PN*

It is generally accepted that is preferable to given TPN via a percutaneous central venous catheter ('long line') than via a peripheral cannula, in view of the decreased risk of extravasation, the difficulty associated in obtaining repeated peripheral access in preterm infants, and the ability to give higher concentrations of glucose and potassium. Central lines on the other hand have the disadvantage of the risk of catheter related infections. A Cochrane review in 2007 concluded that central TPN was not associated with an increased risk of infection compared to peripheral TPN, and there was some evidence that central TPN resulted in a smaller number of catheters/cannulas per infant required to deliver the TPN, together with improved nutrient delivery [24]. However, it also concluded that there was no significant

1  
2  
3  
4  
5  
6  
7  
8  
9  
10  
11  
12  
13  
14  
15  
16  
17  
18  
19  
20  
21  
22  
23  
24  
25  
26  
27  
28  
29  
30  
31  
32  
33  
34  
35  
36  
37  
38  
39  
40  
41  
42  
43  
44  
45  
46  
47  
48  
49  
50  
51  
52  
53  
54  
55  
56  
57  
58  
59  
60

difference in adverse events (including extravasation) when comparing central to peripheral TPN. Therefore, whilst TPN should be given centrally wherever possible, peripheral TPN should be considered in some individual cases where there is significant nutritional risk and a delay or difficulty in obtaining central access [3].

*iv. Monitoring and Complications*

Careful monitoring of patients whilst on TPN is important to ensure appropriate and adequate nutrition, and to identify potential complications, including liver disease, metabolic bone disease and catheter-related infection. Current recommendations regarding monitoring have been laid out by ESPGHANs guidelines on paediatric parenteral nutrition[3]., and can be found in the NNU Parenteral Nutrition Guidebook

**b. ENTERAL FEEDING**

*i. Choice of milk*

There is good evidence that maternal breast milk (and to some extent donor breast milk) is protective against NEC, so breast milk should be the food of first choice [25-30]. Ideally this should be the mother's own fresh colostrum. All mothers of preterm infants should have lactation support, and help with expressing within 6 hours of birth (ideally within half an hour according to current WHO recommendations)[5]. If no maternal milk available by 48 hours and the baby is ready for milk, consent should be sought to use DBM. However, as DBM is a limited resource and there is evidence it contains fewer nutrients than mother's own breast milk, DBM should be reserved only for the purposes of establishing feeds in high risk infants, as laid out in the DBM guideline). Where breast milk cannot be used, preterm infants should receive a specialist high calorie and high protein formula ('LBW formula')[31-33]. Preterm formulas are designed to meet the basic nutritional requirements of most preterm infants when fed between 150 and 180ml/kg. Preterm formulas can be used as soon as commencement of enteral feeding is recommended. Term formulas should not be used as they fail to meet the nutritional needs of premature infants. There is no evidence to support the use of term elemental/semi elemental formulas in the early stages of feeding unless there is a compelling clinical reason to do so.

*ii. Starting Feeds*

The objective of early feeding is to stimulate gut maturation, motility and hormone release. As starvation leads to atrophy of the gut, withholding feeds

1  
2  
3  
4  
5  
6  
7  
8  
9  
10  
11  
12  
13  
14  
15  
16  
17  
18  
19  
20  
21  
22  
23  
24  
25  
26  
27  
28  
29  
30  
31  
32  
33  
34  
35  
36  
37  
38  
39  
40  
41  
42  
43  
44  
45  
46  
47  
48  
49  
50  
51  
52  
53  
54  
55  
56  
57  
58  
59  
60

may render subsequent feeding less safe and protract the time to reach full enteral feeding [34]. No work has yet addressed whether initial feeds should be exclusively breast milk (mother's own or donor) or whether initial feeds should be delayed if only formula is available. However most evidence suggests that any enteral feed given early may be better than gut starvation [35].

Trophic feeding is defined as small volumes of enteral feeds up to 24 mls/kg/day given to promote gut function. It has been shown to prevent changes of starvation in gut mucosa, but a systematic review of 9 trials of trophic feeds vs withholding feed, including 754 infants, did not find any difference in overall feed tolerance, weight gain or rates of NEC [36]. Due to concerns about NEC, commencement of enteral feeds is sometimes delayed in preterm infants. A Cochrane review of early vs delayed introduction of progressive enteral feeds did not show an increase in NEC with early feeds, but despite almost 1000 babies in 5 RCTs the conclusion was that data was insufficient [37]. The ADEPT trial randomised 404 preterm, growth-restricted babies to early feeds (start day 2) or late feeds (start day 6): the early group achieved full feeding earlier, required less PN and had less cholestasis, and no difference was seen in incidence of NEC [38]. There is thus no evidence to support delaying feeds; there is a lack of good evidence to guide feeding policy in babies on inotropes and ibuprofen.

*iii. Rate of advancing feeds*

In standard risk infants a rate of increase of 30ml/kg/day is reported safe, whereas data is more limited in the high risk infant. Evidence points towards several days of trophic feeds followed by a rate of increase of 10-20ml/kg/day. There should be a low threshold for withholding stepped increases secondary to tolerance concerns in the high risk infants. There is limited data on this. A Cochrane review [39] including 4 RCTs and 496 babies, considered increase of up to 24 mls/kg/day as slow, and 25 or greater mls/kg/day as rapid. More rapid increase was associated with earlier tolerance of full feeds and faster weight gain, and no difference in NEC, but numbers were too small to make definite conclusions. This topic is being considered by NIHR for a multi-centre UK trial at present.

*iv. Nutritional Supplements:*

As mentioned above, the nutritional needs of preterm infants are greater than infants born at term, and as such breast milk is adequate to meet those

needs [2]. In order to maintain the benefits of breast milk whilst optimising the nutritional status and growth of preterm infants' single multicomponent fortifiers (BMF) have been developed.

Concerns with the use of BMFs include tolerance and their effects to increasing osmolality and in turn the risk of NEC. Most studies have found no significant problems with the tolerance of fortified EBM [40], and a recent review of published evidence found no link between the relatively small increases in osmolality caused by the addition of fortifier to breast milk and NEC [41]. A Cochrane review concluded that the use of BMFs can lead to short term improvements in weight, length and head circumference and that while it is unlikely that further comparative studies with breast milk alone are to take place it recommends further research seeks to evaluate long term outcomes of BMF therapy and identify the optimum composition of BMF products [42].

Recommendations made in 2010 by ESPGHAN stated that the feed of choice for preterm infants (<1800g) was mother's own breast milk supplemented with BMF, or special preterm formula if breast milk not available [1].

v. *Nutrition at Discharge:*

Preterm infants are often discharged home with growth below that expected according to their birth centile. A review by ESPGHAN in 2006 looking at the evidence for feeding preterm infants after discharge recommended that infants discharged with an appropriate weight for their corrected gestational age should be discharged either breast feeding (where breast fed) or on regular formula (where formula fed). However, they also concluded that preterm infants discharged with a subnormal weight for their corrected gestation age should receive fortifier in addition to breast milk (where breast fed) or on special high energy/protein preterm infant formula (where formula fed) [43]. Recently, a Cochrane review looked at this in more detail, addressing the question of whether using fortifier in breast fed preterm infants after discharge improved growth. It concluded that using fortifier after discharge improved growth in infancy, though the evidence was limited [44].



## 6. References

1. Agostoni, C., et al., *Enteral nutrient supply for preterm infants: commentary from the European Society of Paediatric Gastroenterology, Hepatology and Nutrition Committee on Nutrition*. J Pediatr Gastroenterol Nutr, 2010. **50**(1): p. 85-91.
2. Tsang, R.C., *Nutrition of the preterm infant*. 2nd ed. ed. 2005, Cincinnati: Digital Educational Publishing. viii, 427 p.
3. Koletzko, B., et al., *1. Guidelines on Paediatric Parenteral Nutrition of the European Society of Paediatric Gastroenterology, Hepatology and Nutrition (ESPGHAN) and the European Society for Clinical Nutrition and Metabolism (ESPEN), Supported by the European Society of Paediatric Research (ESPR)*. J Pediatr Gastroenterol Nutr, 2005. **41 Suppl 2**: p. S1-87.
4. Kuzma-O'Reilly, B., et al., *Evaluation, development, and implementation of potentially better practices in neonatal intensive care nutrition*. Pediatrics, 2003. **111**(4 Pt 2): p. e461-70.
5. WHO, *Management and support of infant feeding in maternity facilities*, in *Infant and young child feeding : model chapter for textbooks for medical students and allied health professionals*. 2009, World Health Organisation. p. 29-36.
6. Edmond, K. and R. Bahl, *Optimal feeding of low-birth-weight infants*. 2006, World Health Organisation.
7. Hartnoll, G., P. Betremieux, and N. Modi, *Randomised controlled trial of postnatal sodium supplementation on body composition in 25 to 30 week gestational age infants*. Arch Dis Child Fetal Neonatal Ed, 2000. **82**(1): p. F24-8.
8. Vandenplas, Y., et al., *Guidelines for the diagnosis and management of cow's milk protein allergy in infants*. Arch Dis Child, 2007. **92**(10): p. 902-8.
9. Wood, N.S., et al., *The EPICure study: growth and associated problems in children born at 25 weeks of gestational age or less*. Archives of Disease in Childhood Fetal & Neonatal Edition, 2003. **88**(6): p. F492-500.
10. Ehrenkranz, R.A., et al., *Longitudinal growth of hospitalized very low birth weight infants*. Pediatrics, 1999. **104**(2 Pt 1): p. 280-9.
11. Ehrenkranz, R.A., et al., *Growth in the neonatal intensive care unit influences neurodevelopmental and growth outcomes of extremely low birth weight infants*. Pediatrics, 2006. **117**(4): p. 1253-61.
12. Embleton, N.E., N. Pang, and R.J. Cooke, *Postnatal malnutrition and growth retardation: an inevitable consequence of current recommendations in preterm infants?* Pediatrics, 2001. **107**(2): p. 270-3.
13. Martin, C.R., et al., *Nutritional practices and growth velocity in the first month of life in extremely premature infants*. Pediatrics, 2009. **124**(2): p. 649-57.
14. Cooke, R.J., S.B. Ainsworth, and A.C. Fenton, *Postnatal growth retardation: a universal problem in preterm infants*. Arch Dis Child Fetal Neonatal Ed, 2004. **89**(5): p. F428-30.
15. Patole, S.K. and N. de Klerk, *Impact of standardised feeding regimens on incidence of neonatal necrotising enterocolitis: a systematic review and meta-analysis of observational studies*. Arch Dis Child Fetal Neonatal Ed, 2005. **90**(2): p. F147-51.
16. Donovan, R., et al., *Outcomes of early nutrition support in extremely low-birth-weight infants*. Nutr Clin Pract, 2006. **21**(4): p. 395-400.
17. *Malnutrition- What nurses working with children and young people need to know and do. An RCN position statement*. 2006, Royal College of Nursing.
18. Anderson, T.L., et al., *A controlled trial of glucose versus glucose and amino acids in premature infants*. J Pediatr, 1979. **94**(6): p. 947-51.
19. Ibrahim, H.M., et al., *Aggressive early total parental nutrition in low-birth-weight infants*. J Perinatol, 2004. **24**(8): p. 482-6.
20. Wilson, D.C., et al., *Randomised controlled trial of an aggressive nutritional regimen in sick very low birthweight infants*. Arch Dis Child Fetal Neonatal Ed, 1997. **77**(1): p. F4-11.

21. Van Goudoever, J.B., et al., *Immediate commencement of amino acid supplementation in preterm infants: effect on serum amino acid concentrations and protein kinetics on the first day of life*. *J Pediatr*, 1995. **127**(3): p. 458-65.
22. Mahaveer, A., C. Grime, and C. Morgan, *Increasing early protein intake is associated with a reduction in insulin-treated hyperglycaemia in very preterm infants*. *Arch Dis Child Fetal Neonatal Ed*, 2011. **96**(Suppl 1): p. Fa21.
23. Iacobelli, S., et al., *Standardized parenteral nutrition in preterm infants: early impact on fluid and electrolyte balance*. *Neonatology*, 2010. **98**(1): p. 84-90.
24. Ainsworth, S.B., L. Clerihew, and W. McGuire, *Percutaneous central venous catheters versus peripheral cannulae for delivery of parenteral nutrition in neonates*. *Cochrane Database Syst Rev*, 2007(3): p. CD004219.
25. Lucas, A. and T.J. Cole, *Breast milk and neonatal necrotising enterocolitis*. *Lancet*, 1990. **336**(8730): p. 1519-23.
26. McGuire, W. and M.Y. Anthony, *Donor human milk versus formula for preventing necrotising enterocolitis in preterm infants: systematic review*. *Arch Dis Child Fetal Neonatal Ed*, 2003. **88**(1): p. F11-4.
27. Schanler, R.J., et al., *Randomized trial of donor human milk versus preterm formula as substitutes for mothers' own milk in the feeding of extremely premature infants*. *Pediatrics*, 2005. **116**(2): p. 400-6.
28. Boyd, C.A., M.A. Quigley, and P. Brocklehurst, *Donor breast milk versus infant formula for preterm infants: systematic review and meta-analysis*. *Arch Dis Child Fetal Neonatal Ed*, 2007. **92**(3): p. F169-75.
29. Schanler, R.J., *Suitability of human milk for the low-birthweight infant*. *Clin Perinatol*, 1995. **22**(1): p. 207-22.
30. Henderson, G., M.Y. Anthony, and W. McGuire, *Formula milk versus maternal breast milk for feeding preterm or low birth weight infants*. *Cochrane Database Syst Rev*, 2007(4): p. CD002972.
31. Premji, S.S., T.R. Fenton, and R.S. Sauve, *Higher versus lower protein intake in formula-fed low birth weight infants*. *Cochrane Database Syst Rev*, 2006(1): p. CD003959.
32. Atkinson, S.A., et al., *Randomized Trial of Feeding Nutrient-Enriched vs Standard Formula to Premature Infants during the First Year of Life*. *Pediatric Research*. **45**(4): p. 276A.
33. Lucas, A., F. King, and N.B. Bishop, *Postdischarge formula consumption in infants born preterm*. *Arch Dis Child*, 1992. **67**(6): p. 691-2.
34. Ziegler, E.E., P.J. Thureen, and S.J. Carlson, *Aggressive nutrition of the very low birthweight infant*. *Clin Perinatol*, 2002. **29**(2): p. 225-44.
35. King, C., *What's new in enterally feeding the preterm infant?* *Arch Dis Child Fetal Neonatal Ed*, 2010. **95**(4): p. F304-8.
36. Bombell, S. and W. McGuire, *Early trophic feeding for very low birth weight infants*. *Cochrane Database Syst Rev*, 2009(3): p. CD000504.
37. Morgan, J., L. Young, and W. McGuire, *Delayed introduction of progressive enteral feeds to prevent necrotising enterocolitis in very low birth weight infants*. *Cochrane Database Syst Rev*, 2011(3): p. CD001970.
38. Leaf, A., et al., *Early or late enteral feeding for preterm growth-restricted infants? The abnormal Doppler enteral prescription trial*. *Archives of Disease in Childhood*, 2010. **95**: p. A3.
39. Morgan, J., L. Young, and W. McGuire, *Slow advancement of enteral feed volumes to prevent necrotising enterocolitis in very low birth weight infants*. *Cochrane Database Syst Rev*, 2011(3): p. CD001241.
40. Lucas, A., et al., *Randomized outcome trial of human milk fortification and developmental outcome in preterm infants*. *Am J Clin Nutr*, 1996. **64**(2): p. 142-51.
41. Pearson, F., M.J. Johnson, and A.A. Leaf, *Milk Osmolality - Does it Matter?* *Arch Dis Child Fetal Neonatal Ed*, 2011. **In press**.
42. Kuschel, C.A. and J.E. Harding, *Multicomponent fortified human milk for promoting growth in preterm infants*. *Cochrane Database Syst Rev*, 2004(1): p. CD000343.

- 1  
2  
3  
4  
5  
6  
7  
8  
9  
10  
11  
12  
13  
14  
15  
16  
17  
18  
19  
20  
21  
22  
23  
24  
25  
26  
27  
28  
29  
30  
31  
32  
33  
34  
35  
36  
37  
38  
39  
40  
41  
42  
43  
44  
45  
46  
47  
48  
49  
50  
51  
52  
53  
54  
55  
56  
57  
58  
59  
60
43. Aggett, P.J., et al., *Feeding preterm infants after hospital discharge: a commentary by the ESPGHAN Committee on Nutrition*. *J Pediatr Gastroenterol Nutr*, 2006. **42**(5): p. 596-603.
44. McCormick, F.M., et al., *Multinutrient fortification of human breast milk for preterm infants following hospital discharge*. *Cochrane Database Syst Rev*, 2010(7): p. CD004866.

For peer review only

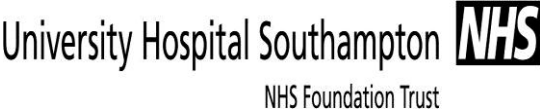

Appendix 1- Nutritional requirements of Preterm Infants

Table with columns for birth weight categories (Extremely Low Birth Weight <1000g and Very Low Birth Weight <1500g) and nutrient types (Energy, Protein, Carbohydrate, Fat, Sodium, Chloride, Potassium, Calcium, Phosphorous, Magnesium, Iron, Zinc, Copper, Selenium, Iodine, Manganese, Vitamin A, Vitamin D, Vitamin E, Vitamin K, Thiamin, Riboflavin, Vitamin B6, Folate, Vitamin B12, Biotin, Pantothenic Acid, Niacin, Vitamin C, Taurine, Choline, Carnitine, Inositol). Rows list various nutrients with values for different feeding methods and growth stages.

Affix Patient Label Here

**Neonatal Nutritional Screening Tool**

*To be completed on admission and weekly  
(every Monday)*

**Gestation at birth:**

**Birth Weight:**

**1. Assess Growth**

|                 |  |                  |  |                |  |
|-----------------|--|------------------|--|----------------|--|
| Current Weight: |  | Current Centile: |  | Birth Centile: |  |
| Current OFC:    |  | Current Centile: |  | Birth Centile: |  |
| Current Length: |  | Current Centile: |  | Birth Centile: |  |

**2. Determine Risk Category**

*Tick*

|               |                                                                                                                                                                                                                                                                                                                                                                                                                                                                      |      |
|---------------|----------------------------------------------------------------------------------------------------------------------------------------------------------------------------------------------------------------------------------------------------------------------------------------------------------------------------------------------------------------------------------------------------------------------------------------------------------------------|------|
| HIGH RISK     | <i>Any one of:</i> <ul style="list-style-type: none"> <li>• Preterm &lt;28 weeks at birth</li> <li>• Extremely Low Birth Weight &lt; 1000g</li> <li>• Severe IUGR (weight &lt; 2<sup>nd</sup> centile and AREFDV) &lt;35 weeks</li> <li>• Infant establishing feeds after episode of NEC or GI perforation</li> <li>• Infants with severe congenital GI malformation: gastroschisis</li> <li>• Perinatal hypoxia / ischaemia with multi-organ dysfunction</li> </ul> | Tick |
| MODERATE RISK | <i>Any one of:</i> <ul style="list-style-type: none"> <li>• Preterm 28-31<sup>+6</sup> weeks, otherwise well</li> <li>• Very Low Birth Weight 1000 - 1500g</li> <li>• Moderate IUGR (weight &lt; 9<sup>th</sup> centile and AREFDV) &lt;35 weeks</li> <li>• Baby on inotropes</li> <li>• Baby on indomethacin/ibuprofen</li> <li>• Illness or congenital anomaly which may compromise feeding</li> <li>• Polycythaemia</li> </ul>                                    | Tick |
| LOW RISK      | <i>Any one of:</i> <ul style="list-style-type: none"> <li>• Preterm 32-36<sup>+6</sup> weeks, otherwise well</li> <li>• AREFDV / IUGR ≥35 weeks</li> </ul>                                                                                                                                                                                                                                                                                                           | Tick |
| NO RISK       | <ul style="list-style-type: none"> <li>• Well Term Infant ≥37 weeks</li> </ul>                                                                                                                                                                                                                                                                                                                                                                                       | Tick |

**3. Determine the need for nutrition team review**

The nutrition team should review any infant meeting the following criteria:

*Tick*

|                                                       |      |
|-------------------------------------------------------|------|
| • High Risk Infants according to criteria above       | Tick |
| • Not regained birth weight by 2 weeks of age         | Tick |
| • >15% weight loss at any time                        | Tick |
| • Weight gain <10g/kg/day from 2 weeks of age onwards | Tick |
| • Drop through 2 centile lines for weight/HC/length   | Tick |
| • Intake <150ml/kg/day from 2 weeks of age onwards    | Tick |
| • NEC or GI surgery at any time                       | Tick |

Name of person completing assessment: \_\_\_\_\_ Signature: \_\_\_\_\_

***If completing a first assessment on admission, please place this form in the plastic wallet in the baby's clear plastic nursing folder, next to the nutrition flow charts***

***If completing a a weekly assessment, please place this form in the box outside Room 3 once filled out***

**Nutrition Team Review**

Date: \_\_\_\_\_

Staff Present:

Day: \_\_\_\_\_

Gestation at Birth: \_\_\_\_\_

Corrected Gestation: \_\_\_\_\_

**Current Clinical Issues:**

**Fluid Intake**

Total Prescribed Fluids: ml/kg/day

Enteral Feed Type:

Parenteral Feed Type:

**Nutrient Intake**

**Enteral Feed Provides:**

Milk Feeds: ml/kg/day kcal/kg/day g/kg/day Protein

**Parenteral Feed Provides:**

Aqueous PN: ml/kg/day kcal/kg/day g/kg/day Protein

Lipid: ml/kg/day kcal/kg/day

---

**Total Intake:** ml/kg/day kcal/kg/day g/kg/day Protein

g/kg/day Lipid

*Comments on intake:*

**Bloods**

|        |                 |             |            |
|--------|-----------------|-------------|------------|
| Hb:    | Sodium:         | Creatinine: | ALP:       |
| CRP:   | Potassium:      | Albumin:    | ALT:       |
| Other: | Urea:           | Bili:       | Magnesium: |
|        | Calcium (corr): |             | Phosphate: |

**Assessment**

**Recommendations**

Additional File 2: Data tables to accompany Figure 3 (mean daily nutrient intakes across stay) and Figure 4 (growth over stay)

| Period                                                             | Degrees of Freedom | Mean Daily Energy Intake in kcal/kg/day (95% CI) |                                                       | Mean Daily Protein Intake in g/kg/day (95% CI) |                                                       | Mean Daily Energy Intake as a percentage of RRI (95% CI) |                                                       | Mean Daily Protein Intake as a percentage of RRI (95% CI) |                                                       |
|--------------------------------------------------------------------|--------------------|--------------------------------------------------|-------------------------------------------------------|------------------------------------------------|-------------------------------------------------------|----------------------------------------------------------|-------------------------------------------------------|-----------------------------------------------------------|-------------------------------------------------------|
|                                                                    |                    | Unadjusted                                       | Adjusted for sex, gestational age and weight at birth | Unadjusted                                     | Adjusted for sex, gestational age and weight at birth | Unadjusted                                               | Adjusted for sex, gestational age and weight at birth | Unadjusted                                                | Adjusted for sex, gestational age and weight at birth |
| A. Pre-implementation period (January 1st - July 31st 2011)        | 10190              | 115.17<br>(111.79 to 118.54)                     | 114.51<br>(111.07 to 117.96)                          | 2.88<br>(2.77 to 2.98)                         | 2.87<br>(2.76 to 2.98)                                | 105.31<br>(103.00 to 107.61)                             | 102.42<br>(100.45 to 104.39)                          | 79.56<br>(77.35 to 81.77)                                 | 79.19<br>(76.92 to 81.45)                             |
| B. Partial implementation period (August 1st - December 31st 2011) | 10190              | 115.77<br>(112.61 to 118.94)                     | 115.21<br>(112.00 to 118.42)                          | 3.09<br>(2.99 to 3.19)                         | 3.09<br>(2.98 to 3.19)                                | 102.69<br>(100.50 to 104.88)                             | 100.86<br>(98.93 to 102.79)                           | 83.53<br>(81.42 to 85.65)                                 | 83.25<br>(81.10 to 85.40)                             |
| C. Main Intervention Period (January 1st - December 31st 2012)     | 10190              | 117.87<br>(115.23 to 120.52)                     | 117.49<br>(114.82 to 120.16)                          | 3.20<br>(3.12 to 3.28)                         | 3.20<br>(3.12 to 3.28)                                | 100.75<br>(98.95 to 102.54)                              | 100.58<br>(99.07 to 102.09)                           | 85.70<br>(83.97 to 87.42)                                 | 85.53<br>(83.78 to 87.28)                             |
| D. Post-implementation period (January 1st - June 30th 2013)       | 10190              | 120.45<br>(116.83 to 124.07)                     | 120.25<br>(116.61 to 123.89)                          | 3.34<br>(3.23 to 3.46)                         | 3.34<br>(3.23 to 3.46)                                | 96.50<br>(94.03 to 98.98)                                | 97.27<br>(95.18 to 99.36)                             | 86.79<br>(84.42 to 89.17)                                 | 86.82<br>(84.42 to 89.22)                             |

Detailed Results of the generalized linear model with mixed effects for nutrient intakes across all 4 study periods. (RRI- reasonable range of intake, CI-confidence interval)

| Comparison | Mean Difference in Daily Energy Intake kcal/kg/day |         |                                                       |         | Mean Difference in Daily Protein Intake g/kg/day |         |                                                       |         | Mean Difference in Daily Energy Intake as a percentage of RRI |         |                                                       |         | Mean Difference in Daily Protein Intake as a percentage of RRI |         |                                                       |         |
|------------|----------------------------------------------------|---------|-------------------------------------------------------|---------|--------------------------------------------------|---------|-------------------------------------------------------|---------|---------------------------------------------------------------|---------|-------------------------------------------------------|---------|----------------------------------------------------------------|---------|-------------------------------------------------------|---------|
|            | Unadjusted                                         | p value | Adjusted for sex, gestational age and weight at birth | p value | Unadjusted                                       | p value | Adjusted for sex, gestational age and weight at birth | p value | Unadjusted                                                    | p value | Adjusted for sex, gestational age and weight at birth | p value | Unadjusted                                                     | p value | Adjusted for sex, gestational age and weight at birth | p value |
| A vs B     | -0.601                                             | 0.986   | -0.698                                                | 0.979   | -0.216                                           | 0.001   | -0.215                                                | 0.001   | 2.612                                                         | 0.162   | 1.559                                                 | 0.536   | -3.971                                                         | 0.006   | -4.066                                                | 0.005   |
| A vs C     | -2.704                                             | 0.549   | -2.974                                                | 0.47    | -0.33                                            | <0.001  | -0.33                                                 | <0.001  | 4.559                                                         | 0.007   | 1.843                                                 | 0.431   | -6.136                                                         | <0.001  | -6.345                                                | <0.001  |
| A vs D     | -5.279                                             | 0.143   | -5.733                                                | 0.101   | -0.472                                           | <0.001  | -0.473                                                | <0.001  | 8.802                                                         | <0.001  | 5.149                                                 | 0.002   | -7.232                                                         | <0.001  | -7.633                                                | <0.001  |
| B vs C     | -2.103                                             | 0.638   | -2.276                                                | 0.577   | -0.114                                           | 0.169   | -0.115                                                | 0.169   | 1.947                                                         | 0.409   | 0.283                                                 | 0.994   | -2.165                                                         | 0.283   | -2.28                                                 | 0.242   |
| B vs D     | -4.678                                             | 0.19    | -5.035                                                | 0.144   | -0.256                                           | 0.003   | -0.257                                                | 0.003   | 6.19                                                          | 0.001   | 3.59                                                  | 0.058   | -3.262                                                         | 0.163   | -3.568                                                | 0.113   |
| C vs D     | -2.575                                             | 0.543   | -2.759                                                | 0.489   | -0.142                                           | 0.087   | -0.143                                                | 0.091   | 4.243                                                         | 0.01    | 3.306                                                 | 0.031   | -1.096                                                         | 0.837   | -1.288                                                | 0.766   |

Pairwise comparison of all study periods using the generalized linear model with mixed effects approach, showing difference between periods. P values <0.05 are highlighted in bold. Unadjusted differences are given together with differences adjusted for sex, gestational age and weight at birth. Tukey's method was used to adjust for multiple comparisons. (RRI- reasonable range of intake)

| Period                                                             | Mean Change in Weight SDS from birth (95% Confidence Interval) |                              |                                                       | Mean Change in Head Circumference from birth (95% Confidence Interval) |                              |                                                       |
|--------------------------------------------------------------------|----------------------------------------------------------------|------------------------------|-------------------------------------------------------|------------------------------------------------------------------------|------------------------------|-------------------------------------------------------|
|                                                                    | Degrees of Freedom                                             | Unadjusted                   | Adjusted for sex, gestational age and weight at birth | Degrees of Freedom                                                     | Unadjusted                   | Adjusted for sex, gestational age and weight at birth |
| A. Pre-implementation period (January 1st - July 31st 2011)        | 3628                                                           | -0.941<br>(-1.040 to -0.842) | -0.939<br>(-1.032 to -0.847)                          | 745                                                                    | -0.989<br>(-1.290 to -0.687) | -1.0574<br>(-1.322 to -0.793)                         |
| B. Partial implementation period (August 1st - December 31st 2011) | 3628                                                           | -0.677<br>(-0.767 to -0.587) | -0.693<br>(-0.778 to -0.609)                          | 745                                                                    | -0.819<br>(-1.089 to -0.548) | -0.908<br>(-1.153 to -0.662)                          |
| C. Main Intervention Period (January 1st - December 31st 2012)     | 3628                                                           | -0.476<br>(-0.556 to -0.397) | -0.510<br>(-0.583 to -0.437)                          | 745                                                                    | -0.685<br>(-0.855 to -0.515) | -0.738<br>(-0.884 to -0.591)                          |
| D. Post-implementation period (January 1st - June 30th 2013)       | 3628                                                           | -0.342<br>(-0.445 to -0.239) | -0.3911 (-0.4865 to -0.2957)                          | 745                                                                    | -0.571<br>(-0.807 to -0.335) | -0.645<br>(-0.851 to -0.434)                          |

Detailed Results of the general linear model with mixed effects for the change in standard deviation scores (SDS) during stay across all 4 study periods.

| Comparison | Mean Change in Weight SDS from birth |         |                                                       |         | Mean Change in Head Circumference SDS from birth |         |                                                       |         |
|------------|--------------------------------------|---------|-------------------------------------------------------|---------|--------------------------------------------------|---------|-------------------------------------------------------|---------|
|            | Unadjusted                           | p value | Adjusted for sex, gestational age and weight at birth | p value | Unadjusted                                       | p value | Adjusted for sex, gestational age and weight at birth | p value |
| A vs B     | -0.264                               | <0.001  | -0.245                                                | <0.001  | -0.17                                            | 0.823   | -0.15                                                 | 0.83    |
| A vs C     | -0.465                               | <0.001  | -0.429                                                | <0.001  | -0.304                                           | 0.305   | -0.32                                                 | 0.155   |
| A vs D     | -0.599                               | <0.001  | -0.548                                                | <0.001  | -0.418                                           | 0.14    | -0.413                                                | 0.077   |
| B vs C     | -0.201                               | <0.001  | -0.184                                                | <0.001  | -0.134                                           | 0.796   | -0.17                                                 | 0.582   |
| B vs D     | -0.335                               | <0.001  | -0.302                                                | <0.001  | -0.248                                           | 0.508   | -0.263                                                | 0.363   |
| C vs D     | -0.134                               | 0.028   | -0.119                                                | 0.055   | -0.114                                           | 0.827   | -0.093                                                | 0.867   |

Pairwise comparison of all study periods using the general linear model with mixed effects approach, showing difference between periods. P values <0.05 are highlighted in bold. Unadjusted differences are given together with differences adjusted for sex, gestational age and weight at birth. Tukey's method was used to adjust for multiple comparisons. (SDS-standard deviation score)



STROBE 2007 (v4) Statement—Checklist of items that should be included in reports of *cohort studies*

| Section/Topic                | Item # | Recommendation                                                                                                                                                                       | Reported on page # |
|------------------------------|--------|--------------------------------------------------------------------------------------------------------------------------------------------------------------------------------------|--------------------|
| Title and abstract           | 1      | (a) Indicate the study's design with a commonly used term in the title or the abstract                                                                                               | 1                  |
|                              |        | (b) Provide in the abstract an informative and balanced summary of what was done and what was found                                                                                  | 2                  |
| <b>Introduction</b>          |        |                                                                                                                                                                                      |                    |
| Background/rationale         | 2      | Explain the scientific background and rationale for the investigation being reported                                                                                                 | 4                  |
| Objectives                   | 3      | State specific objectives, including any prespecified hypotheses                                                                                                                     | 5-6                |
| <b>Methods</b>               |        |                                                                                                                                                                                      |                    |
| Study design                 | 4      | Present key elements of study design early in the paper                                                                                                                              | 6-7                |
| Setting                      | 5      | Describe the setting, locations, and relevant dates, including periods of recruitment, exposure, follow-up, and data collection                                                      | 6-7                |
| Participants                 | 6      | (a) Give the eligibility criteria, and the sources and methods of selection of participants. Describe methods of follow-up                                                           | 6-8                |
|                              |        | (b) For matched studies, give matching criteria and number of exposed and unexposed                                                                                                  |                    |
| Variables                    | 7      | Clearly define all outcomes, exposures, predictors, potential confounders, and effect modifiers. Give diagnostic criteria, if applicable                                             | 8-9                |
| Data sources/<br>measurement | 8*     | For each variable of interest, give sources of data and details of methods of assessment (measurement). Describe comparability of assessment methods if there is more than one group | 8-9                |
| Bias                         | 9      | Describe any efforts to address potential sources of bias                                                                                                                            | 9-10               |
| Study size                   | 10     | Explain how the study size was arrived at                                                                                                                                            | 7-8                |
| Quantitative variables       | 11     | Explain how quantitative variables were handled in the analyses. If applicable, describe which groupings were chosen and why                                                         | 9-10               |
| Statistical methods          | 12     | (a) Describe all statistical methods, including those used to control for confounding                                                                                                | 9-10               |
|                              |        | (b) Describe any methods used to examine subgroups and interactions                                                                                                                  | 9-10               |
|                              |        | (c) Explain how missing data were addressed                                                                                                                                          | 10                 |
|                              |        | (d) If applicable, explain how loss to follow-up was addressed                                                                                                                       | N/A                |
|                              |        | (e) Describe any sensitivity analyses                                                                                                                                                | 9-10               |
| <b>Results</b>               |        |                                                                                                                                                                                      |                    |

|                          |     |                                                                                                                                                                                                              |                                          |
|--------------------------|-----|--------------------------------------------------------------------------------------------------------------------------------------------------------------------------------------------------------------|------------------------------------------|
| Participants             | 13* | (a) Report numbers of individuals at each stage of study—eg numbers potentially eligible, examined for eligibility, confirmed eligible, included in the study, completing follow-up, and analysed            | 11                                       |
|                          |     | (b) Give reasons for non-participation at each stage                                                                                                                                                         | N/A                                      |
|                          |     | (c) Consider use of a flow diagram                                                                                                                                                                           | Figure 2                                 |
| Descriptive data         | 14* | (a) Give characteristics of study participants (eg demographic, clinical, social) and information on exposures and potential confounders                                                                     | 11                                       |
|                          |     | (b) Indicate number of participants with missing data for each variable of interest                                                                                                                          | 11, additional file 2                    |
|                          |     | (c) Summarise follow-up time (eg, average and total amount)                                                                                                                                                  | 10-14                                    |
| Outcome data             | 15* | Report numbers of outcome events or summary measures over time                                                                                                                                               | 10-14, figure 3 and 4                    |
| Main results             | 16  | (a) Give unadjusted estimates and, if applicable, confounder-adjusted estimates and their precision (eg, 95% confidence interval). Make clear which confounders were adjusted for and why they were included | 11-13, figure 3 and 4, additional file 2 |
|                          |     | (b) Report category boundaries when continuous variables were categorized                                                                                                                                    | 11-13, figure 3 and 4, additional file 2 |
|                          |     | (c) If relevant, consider translating estimates of relative risk into absolute risk for a meaningful time period                                                                                             | N/A                                      |
| Other analyses           | 17  | Report other analyses done—eg analyses of subgroups and interactions, and sensitivity analyses                                                                                                               | N/A                                      |
| <b>Discussion</b>        |     |                                                                                                                                                                                                              |                                          |
| Key results              | 18  | Summarise key results with reference to study objectives                                                                                                                                                     | 15-16                                    |
| <b>Limitations</b>       |     |                                                                                                                                                                                                              |                                          |
| Interpretation           | 20  | Give a cautious overall interpretation of results considering objectives, limitations, multiplicity of analyses, results from similar studies, and other relevant evidence                                   | 15-19                                    |
| Generalisability         | 21  | Discuss the generalisability (external validity) of the study results                                                                                                                                        | 15-19                                    |
| <b>Other information</b> |     |                                                                                                                                                                                                              |                                          |
| Funding                  | 22  | Give the source of funding and the role of the funders for the present study and, if applicable, for the original study on which the present article is based                                                | 22                                       |

\*Give information separately for cases and controls in case-control studies and, if applicable, for exposed and unexposed groups in cohort and cross-sectional studies.

**Note:** An Explanation and Elaboration article discusses each checklist item and gives methodological background and published examples of transparent reporting. The STROBE checklist is best used in conjunction with this article (freely available on the Web sites of PLoS Medicine at <http://www.plosmedicine.org/>, Annals of Internal Medicine at <http://www.annals.org/>, and Epidemiology at <http://www.epidem.com/>). Information on the STROBE Initiative is available at [www.strobe-statement.org](http://www.strobe-statement.org).
