# Supplementary material for: Successfully implementing and embedding guidelines to improve the nutrition and growth of preterm infants in neonatal intensive care: a prospective interventional study
Source: PubMed Central journal article supplement (PMC5728292; doi:10.1136/bmjopen-2017-017727), 2017-12-06
Supplement: bmjopen-2017-017727supp002.pdf [file bmjopen-2017-017727supp002.pdf]

## Additional File 2: Data tables to accompany Figure 3 (mean daily nutrient intakes across stay) and Figure 4 (growth over stay)

| Period                                                             | Degrees of Freedom | Mean Daily Energy Intake in kcal/kg/day (95% CI) |                                                       | Mean Daily Protein Intake in g/kg/day (95% CI) |                                                       | Mean Daily Energy Intake as a percentage of RRI (95% CI) |                                                       | Mean Daily Protein Intake as a percentage of RRI (95% CI) |                                                       |
|--------------------------------------------------------------------|--------------------|--------------------------------------------------|-------------------------------------------------------|------------------------------------------------|-------------------------------------------------------|----------------------------------------------------------|-------------------------------------------------------|-----------------------------------------------------------|-------------------------------------------------------|
|                                                                    |                    | Unadjusted                                       | Adjusted for sex, gestational age and weight at birth | Unadjusted                                     | Adjusted for sex, gestational age and weight at birth | Unadjusted                                               | Adjusted for sex, gestational age and weight at birth | Unadjusted                                                | Adjusted for sex, gestational age and weight at birth |
| A. Pre-implementation period (January 1st - July 31st 2011)        | 10190              | 115.17<br>(111.79 to 118.54)                     | 114.51<br>(111.07 to 117.96)                          | 2.88<br>(2.77 to 2.98)                         | 2.87<br>(2.76 to 2.98)                                | 105.31<br>(103.00 to 107.61)                             | 102.42<br>(100.45 to 104.39)                          | 79.56<br>(77.35 to 81.77)                                 | 79.19<br>(76.92 to 81.45)                             |
| B. Partial implementation period (August 1st - December 31st 2011) | 10190              | 115.77<br>(112.61 to 118.94)                     | 115.21<br>(112.00 to 118.42)                          | 3.09<br>(2.99 to 3.19)                         | 3.09<br>(2.98 to 3.19)                                | 102.69<br>(100.50 to 104.88)                             | 100.86<br>(98.93 to 102.79)                           | 83.53<br>(81.42 to 85.65)                                 | 83.25<br>(81.10 to 85.40)                             |
| C. Main Intervention Period (January 1st - December 31st 2012)     | 10190              | 117.87<br>(115.23 to 120.52)                     | 117.49<br>(114.82 to 120.16)                          | 3.20<br>(3.12 to 3.28)                         | 3.20<br>(3.12 to 3.28)                                | 100.75<br>(98.95 to 102.54)                              | 100.58<br>(99.07 to 102.09)                           | 85.70<br>(83.97 to 87.42)                                 | 85.53<br>(83.78 to 87.28)                             |
| D. Post-implementation period (January 1st - June 30th 2013)       | 10190              | 120.45<br>(116.83 to 124.07)                     | 120.25<br>(116.61 to 123.89)                          | 3.34<br>(3.23 to 3.46)                         | 3.34<br>(3.23 to 3.46)                                | 96.50<br>(94.03 to 98.98)                                | 97.27<br>(95.18 to 99.36)                             | 86.79<br>(84.42 to 89.17)                                 | 86.82<br>(84.42 to 89.22)                             |

**Detailed Results of the generalized linear model with mixed effects for nutrient intakes across all 4 study periods.** (RRI- reasonable range of intake, CI-confidence interval)

| Comparison | Mean Difference in Daily Energy Intake kcal/kg/day |         |                                                       |         | Mean Difference in Daily Protein Intake g/kg/day |         |                                                       |         | Mean Difference in Daily Energy Intake as a percentage of RRI |         |                                                       |         | Mean Difference in Daily Protein Intake as a percentage of RRI |         |                                                       |         |
|------------|----------------------------------------------------|---------|-------------------------------------------------------|---------|--------------------------------------------------|---------|-------------------------------------------------------|---------|---------------------------------------------------------------|---------|-------------------------------------------------------|---------|----------------------------------------------------------------|---------|-------------------------------------------------------|---------|
|            | Unadjusted                                         | p value | Adjusted for sex, gestational age and weight at birth | p value | Unadjusted                                       | p value | Adjusted for sex, gestational age and weight at birth | p value | Unadjusted                                                    | p value | Adjusted for sex, gestational age and weight at birth | p value | Unadjusted                                                     | p value | Adjusted for sex, gestational age and weight at birth | p value |
| A vs B     | -0.601                                             | 0.986   | -0.698                                                | 0.979   | -0.216                                           | 0.001   | -0.215                                                | 0.001   | 2.612                                                         | 0.162   | 1.559                                                 | 0.536   | -3.971                                                         | 0.006   | -4.066                                                | 0.005   |
| A vs C     | -2.704                                             | 0.549   | -2.974                                                | 0.47    | -0.33                                            | <0.001  | -0.33                                                 | <0.001  | 4.559                                                         | 0.007   | 1.843                                                 | 0.431   | -6.136                                                         | <0.001  | -6.345                                                | <0.001  |
| A vs D     | -5.279                                             | 0.143   | -5.733                                                | 0.101   | -0.472                                           | <0.001  | -0.473                                                | <0.001  | 8.802                                                         | <0.001  | 5.149                                                 | 0.002   | -7.232                                                         | <0.001  | -7.633                                                | <0.001  |
| B vs C     | -2.103                                             | 0.638   | -2.276                                                | 0.577   | -0.114                                           | 0.169   | -0.115                                                | 0.169   | 1.947                                                         | 0.409   | 0.283                                                 | 0.994   | -2.165                                                         | 0.283   | -2.28                                                 | 0.242   |
| B vs D     | -4.678                                             | 0.19    | -5.035                                                | 0.144   | -0.256                                           | 0.003   | -0.257                                                | 0.003   | 6.19                                                          | 0.001   | 3.59                                                  | 0.058   | -3.262                                                         | 0.163   | -3.568                                                | 0.113   |
| C vs D     | -2.575                                             | 0.543   | -2.759                                                | 0.489   | -0.142                                           | 0.087   | -0.143                                                | 0.091   | 4.243                                                         | 0.01    | 3.306                                                 | 0.031   | -1.096                                                         | 0.837   | -1.288                                                | 0.766   |

**Pairwise comparison of all study periods using the generalized linear model with mixed effects approach, showing difference between periods.** P values <0.05 are highlighted in bold. Unadjusted differences are given together with differences adjusted for sex, gestational age and weight at birth. Tukey's method was used to adjust for multiple comparisons. (RRI- reasonable range of intake)

| Period                                                             | Mean Change in Weight SDS from birth (95% Confidence Interval) |                              |                                                       | Mean Change in Head Circumference from birth (95% Confidence Interval) |                              |                                                       |
|--------------------------------------------------------------------|----------------------------------------------------------------|------------------------------|-------------------------------------------------------|------------------------------------------------------------------------|------------------------------|-------------------------------------------------------|
|                                                                    | Degrees of Freedom                                             | Unadjusted                   | Adjusted for sex, gestational age and weight at birth | Degrees of Freedom                                                     | Unadjusted                   | Adjusted for sex, gestational age and weight at birth |
| A. Pre-implementation period (January 1st - July 31st 2011)        | 3628                                                           | -0.941<br>(-1.040 to -0.842) | -0.939<br>(-1.032 to -0.847)                          | 745                                                                    | -0.989<br>(-1.290 to -0.687) | -1.0574<br>(-1.322 to -0.793)                         |
| B. Partial implementation period (August 1st - December 31st 2011) | 3628                                                           | -0.677<br>(-0.767 to -0.587) | -0.693<br>(-0.778 to -0.609)                          | 745                                                                    | -0.819<br>(-1.089 to -0.548) | -0.908<br>(-1.153 to -0.662)                          |
| C. Main Intervention Period (January 1st - December 31st 2012)     | 3628                                                           | -0.476<br>(-0.556 to -0.397) | -0.510<br>(-0.583 to -0.437)                          | 745                                                                    | -0.685<br>(-0.855 to -0.515) | -0.738<br>(-0.884 to -0.591)                          |
| D. Post-implementation period (January 1st - June 30th 2013)       | 3628                                                           | -0.342<br>(-0.445 to -0.239) | -0.3911 (-0.4865 to -0.2957)                          | 745                                                                    | -0.571<br>(-0.807 to -0.335) | -0.645<br>(-0.851 to -0.434)                          |

Detailed Results of the general linear model with mixed effects for the change in standard deviation scores (SDS) during stay across all 4 study periods.

| Comparison | Mean Change in Weight SDS from birth |         |                                                       |         | Mean Change in Head Circumference SDS from birth |         |                                                       |         |
|------------|--------------------------------------|---------|-------------------------------------------------------|---------|--------------------------------------------------|---------|-------------------------------------------------------|---------|
|            | Unadjusted                           | p value | Adjusted for sex, gestational age and weight at birth | p value | Unadjusted                                       | p value | Adjusted for sex, gestational age and weight at birth | p value |
| A vs B     | -0.264                               | <0.001  | -0.245                                                | <0.001  | -0.17                                            | 0.823   | -0.15                                                 | 0.83    |
| A vs C     | -0.465                               | <0.001  | -0.429                                                | <0.001  | -0.304                                           | 0.305   | -0.32                                                 | 0.155   |
| A vs D     | -0.599                               | <0.001  | -0.548                                                | <0.001  | -0.418                                           | 0.14    | -0.413                                                | 0.077   |
| B vs C     | -0.201                               | <0.001  | -0.184                                                | <0.001  | -0.134                                           | 0.796   | -0.17                                                 | 0.582   |
| B vs D     | -0.335                               | <0.001  | -0.302                                                | <0.001  | -0.248                                           | 0.508   | -0.263                                                | 0.363   |
| C vs D     | -0.134                               | 0.028   | -0.119                                                | 0.055   | -0.114                                           | 0.827   | -0.093                                                | 0.867   |

Pairwise comparison of all study periods using the general linear model with mixed effects approach, showing difference between periods. P values <0.05 are highlighted in bold. Unadjusted differences are given together with differences adjusted for sex, gestational age and weight at birth. Tukey's method was used to adjust for multiple comparisons. (SDS-standard deviation score)
